# Supplementary material for: Pd-catalyzed arylation/aza-Michael addition cascade to C2-spiroindolines and azabicyclo[3.2.2]nonanones
Source: Royal Society of Chemistry journal article supplement (doi:10.1039/d0cc04935b), 2020-01-01

# Supporting Information

## Pd-Catalyzed Arylation/Aza-Michael Addition Cascade to C2-Spiroindolines and Azabicyclo[3.2.2]nonanones

Xiao-Wen Zhang, Hui Zhang, Hu-Chong Wang, Ming-Hui Zhu, Hengjiang Cong,  
and Wen-Bo Liu\*

Sauvage Center for Molecular Sciences; Engineering Research Center of Organosilicon  
Compounds & Materials (Ministry of Education); College of Chemistry and Molecular  
Sciences, Wuhan University, Wuhan, Hubei, 430072, China

*E-mail: wenboliu@whu.edu.cn*

### Table of Contents

|                                                                                                                                                                    |    |
|--------------------------------------------------------------------------------------------------------------------------------------------------------------------|----|
| General Information and Materials .....                                                                                                                            | 1  |
| Optimization of Reaction Conditions for the synthesis of C2-Spiroindolines <b>3aa</b> (Tables S1–S4) .....                                                         | 2  |
| Optimization of Reaction Conditions for the synthesis of Azabicyclo[3.2.2]nonan-ones <b>6a</b> (Tables S5–S8) .....                                                | 4  |
| Asymmetric Evaluation to Azabicyclo[3.2.2]nonan-ones <b>6a</b> (Tables S9) .....                                                                                   | 6  |
| Scheme S1. Unsuccessful Substrates .....                                                                                                                           | 7  |
| General Procedure and Spectroscopic Data for Pd-Catalyzed Cascade Vinylogous Arylation/Aza-Michael Addition Reaction to Construct C2-Spiroindolines .....          | 7  |
| General Procedure and Spectroscopic Data for Pd-Catalyzed Cascade $\alpha'$ -Arylation/Aza-Michael Addition Reaction to Construct Azabicyclo[3.2.2]nonanones ..... | 16 |
| Gram Scale Synthesis of <b>3aa</b> .....                                                                                                                           | 20 |
| Preparation and Characterization of Substrates .....                                                                                                               | 20 |
| X-Ray Crystallographic Data of <b>3aa</b> and <b>3ac</b> .....                                                                                                     | 22 |
| Reference .....                                                                                                                                                    | 40 |
| $^1\text{H}$ NMR and $^{13}\text{C}$ NMR Spectra of New Compounds .....                                                                                            | 41 |

## General Information and Materials

Unless otherwise stated, all reactions were carried out with oven-dried glassware using Schlenk manifolds under an atmosphere of dry argon. Reactions were monitored by thin-layer chromatography (TLC) or gas chromatography mass spectrometry (GC-MS). TLC was performed using Huanghai  $8\pm 0.2$   $\mu\text{m}$  precoated glass plates (0.25 mm) and visualized by UV fluorescence quenching,  $\text{KMnO}_4$ , *p*-anisaldehyde, or phosphomolybdic acid staining. Huanghai silica gel (particle size 300 – 400 or 200 – 300 mesh) was used for silica gel chromatography.  $^1\text{H}$  NMR spectra were recorded at room temperature on a Bruker ADVANCE III 400 MHz spectrometer and were reported relative to  $\text{CDCl}_3$  ( $\delta$  7.26 ppm),  $\text{C}_6\text{D}_6$  ( $\delta$  7.16 ppm), or acetone-*d*<sub>6</sub> ( $\delta$  2.05 ppm).  $^{13}\text{C}$  NMR spectra were recorded on a Bruker ADVANCE III 400 MHz spectrometer (100 MHz) and were reported relative to  $\text{CDCl}_3$  ( $\delta$  77.16 ppm),  $\text{C}_6\text{D}_6$  ( $\delta$  128.06 ppm), or acetone-*d*<sub>6</sub> ( $\delta$  29.84 ppm).  $^{19}\text{F}$  NMR spectra were recorded on a Bruker ADVANCE III 400 MHz spectrometer (376 MHz) and were reported relative to  $\text{CFCl}_3$  ( $\delta$  0.0 ppm). Data for  $^1\text{H}$  NMR were reported as chemical shift ( $\delta$  ppm) (multiplicity, coupling constant (Hz), integration) using standard abbreviations for multiplicities: s = singlet, d = doublet, t = triplet, q = quartet, quint = quintet, m = multiplet, and br s = broad signal. Data for  $^{13}\text{C}$  NMR and  $^{19}\text{F}$  NMR were reported in terms of chemical shifts ( $\delta$  ppm). High resolution mass spectra (HRMS) were obtained by use of a Bruker Compact TOF mass spectrometer in an electrospray ionization mode (ESI+) or an atmospheric pressure chemical ionization (APCI+).

Petroleum ether (60 ~ 90 °C) was used as eluent for silica gel chromatography. Dry solvents were purchased commercially or were dried by passage through an activated alumina column under argon. Other reagents were purchased commercially and used without further purification unless otherwise noted.

## Optimization of Reaction Conditions for the synthesis of C2-Spiroindolines 3aa (Tables S1–S4)

**Table S1. Screening of bases.**

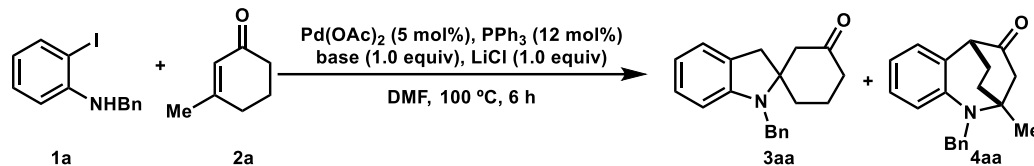

| entry <sup>a</sup> | base                | yield of 3aa/4aa (%) | entry | base                            | yield of 3aa/4aa (%) |
|--------------------|---------------------|----------------------|-------|---------------------------------|----------------------|
| 1                  | NaOMe               | –                    | 7     | LiO <sup>t</sup> Bu             | 62/5                 |
| 2                  | NaOH                | 10/–                 | 8     | LiHMDS                          | 31/–                 |
| 3                  | NaH                 | 6/–                  | 9     | KOTMS                           | 29/–                 |
| 4                  | NaHMDS              | 27/–                 | 10    | K <sub>3</sub> PO <sub>4</sub>  | –                    |
| 5                  | NaO <sup>t</sup> Bu | 37/–                 | 11    | Cs <sub>2</sub> CO <sub>3</sub> | –                    |
| 6                  | KO <sup>t</sup> Bu  | 43/8                 | 12    | TBD <sup>b</sup>                | –                    |

<sup>a</sup> Reaction conditions: **1a** (0.2 mmol), **2a** (0.4 mmol), Pd(OAc)<sub>2</sub> (5 mol%), PPh<sub>3</sub> (12 mol%), base (1.0 equiv), LiCl (1.0 equiv) in DMF (1 mL) at 100 °C for 6 h. <sup>b</sup> TBD = 1,5,7-triazabicyclo[4.4.0]dec-5-ene.

**Table S2. Screening of solvents.**

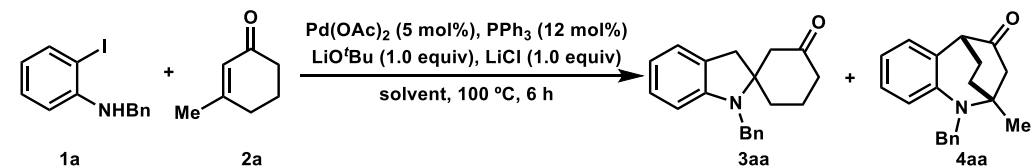

| entry <sup>a</sup> | solvent     | yield of 3aa/4aa (%) | entry | solvent | yield of 3aa/4aa (%) |
|--------------------|-------------|----------------------|-------|---------|----------------------|
| 1                  | THF         | –                    | 5     | DMF     | 62/5                 |
| 2                  | toluene     | –                    | 6     | NMP     | 51/–                 |
| 3                  | DME         | –                    | 7     | DMSO    | 47/–                 |
| 4                  | 1,4-dioxane | –                    |       |         |                      |

<sup>a</sup> Reaction conditions: **1a** (0.2 mmol), **2a** (0.4 mmol), Pd(OAc)<sub>2</sub> (5 mol%), PPh<sub>3</sub> (12 mol%), LiO<sup>t</sup>Bu (1.0 equiv), LiCl (1.0 equiv) in solvent (1 mL) at 100 °C for 6 h.

**Table S3. Screening of palladium precursors.**

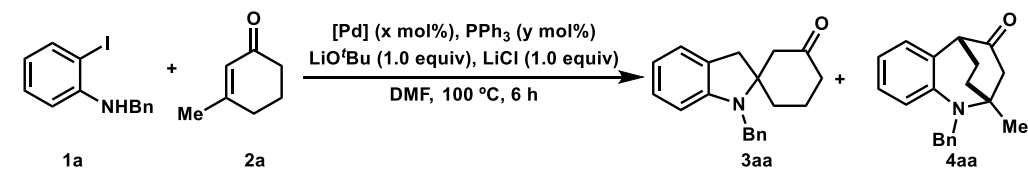

| entry <sup>a</sup> | [Pd] (x mol%) | PPh <sub>3</sub> (y mol%) | yield of 3aa/4aa (%) |
|--------------------|---------------|---------------------------|----------------------|
|                    |               |                           |                      |

|   |                                          |    |      |
|---|------------------------------------------|----|------|
| 1 | Pd(OAc) <sub>2</sub> (5)                 | 12 | 62/5 |
| 2 | Pd(PPh <sub>3</sub> ) <sub>4</sub> (5)   | 0  | 71/– |
| 3 | Pd <sub>2</sub> (dba) <sub>3</sub> (2.5) | 12 | 68/6 |

<sup>a</sup> Reaction conditions: **1a** (0.2 mmol), **2a** (0.4 mmol), [Pd] (5 mol%), PPh<sub>3</sub> (12 mol%), LiO<sup>t</sup>Bu (1.0 equiv), LiCl (1.0 equiv) in DMF (1 mL) at 100 °C for 6 h.

**Table S4. Screening of catalyst loading, amount of base, and temperature.**

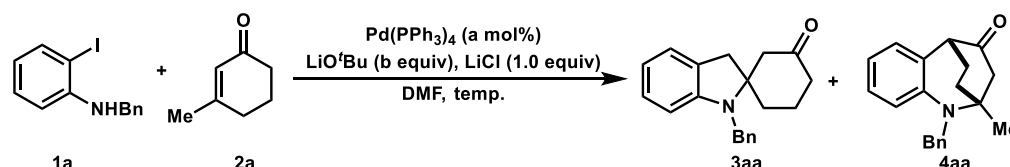

| entry <sup>a</sup> | Pd(PPh <sub>3</sub> ) <sub>4</sub><br>(a mol%) | LiO <sup>t</sup> Bu<br>(b equiv) | temp. (°C) | time (h) | yield of<br><b>3aa/4aa</b> (%) |
|--------------------|------------------------------------------------|----------------------------------|------------|----------|--------------------------------|
| 1 <sup>b</sup>     | 5                                              | 1.0                              | 100        | 6        | 71/–                           |
| 2                  | 5                                              | 1.0                              | 100        | 6        | 76/5                           |
| 3                  | 2                                              | 1.0                              | 100        | 6        | 73/–                           |
| 4                  | 1                                              | 1.0                              | 100        | 6        | 80/–                           |
| 5                  | 1                                              | 1.0                              | 120        | 6        | 71/5                           |
| 6                  | 1                                              | 1.0                              | 80         | 6        | 76/5                           |
| 7                  | 1                                              | 1.0                              | 60         | 24       | 79/–                           |
| 8                  | 1                                              | 1.0                              | 40         | 24       | 62/–                           |
| 9                  | 1                                              | 1.2                              | 60         | 24       | 81(80)/–                       |
| 10                 | 1                                              | 1.5                              | 60         | 24       | 67/13                          |
| 11                 | 0                                              | 1.2                              | 60         | 24       | –                              |
| 12                 | 1                                              | 0                                | 60         | 24       | –                              |
| 13 <sup>c</sup>    | 1                                              | 1.2                              | 60         | 24       | 80/7                           |

<sup>a</sup> Reaction conditions: **1a** (0.2 mmol), **2a** (0.4 mmol), Pd(PPh<sub>3</sub>)<sub>4</sub> (a mol%), LiO<sup>t</sup>Bu (b equiv), LiCl (1.0 equiv) in DMF (2 mL, c = 0.1 mol/mL). <sup>b</sup> c = 0.2 mol/mL. <sup>c</sup> Without LiCl.

**General procedure for condition optimizations (Tables S1–S4):** In an argon-filled glovebox, to a screw capped vial equipped with a magnetic stirring bar were added [Pd] (0.01 mmol, 5 mol%), PPh<sub>3</sub> (0.024 mmol, 12 mol%, if necessary), base (1.0 equiv), LiCl (1.0 equiv), **1a** (0.2 mmol), **2a** (0.4 mmol), and DMF (1 mL). After the vial was sealed, the contents were stirred at the indicated temperature for the indicated time. The vial was removed from the glovebox, diluted with EA (10 mL) and water (10 mL). The aqueous phase was extracted with EA (10 mL × 3) and the combined organic layers were washed with H<sub>2</sub>O (10 mL × 3) and brine, then dried over anhydrous Na<sub>2</sub>SO<sub>4</sub>. The solvents were removed under reduced pressure and the yield was determined by <sup>1</sup>H NMR of the crude mixture using 1,3,5-trimethoxybenzene as an internal standard.

## Optimization of Reaction Conditions for the synthesis of Azabicyclo[3.2.2]nonan-ones **6a** (Tables S5–S8)

**Table S5. Screening of palladium precursors.**

| entry <sup>a</sup> | [Pd]                                                | yield (%) <sup>b</sup> |
|--------------------|-----------------------------------------------------|------------------------|
| 1 <sup>c</sup>     | Pd(PPh <sub>3</sub> ) <sub>4</sub>                  | (49) <sup>d</sup>      |
| 2                  | Pd(TFA) <sub>2</sub>                                | 60                     |
| 3                  | Pd(OAc) <sub>2</sub>                                | 51                     |
| 4                  | Pd(CH <sub>3</sub> CN) <sub>2</sub> Cl <sub>2</sub> | 67 (65) <sup>d</sup>   |
| 5 <sup>e</sup>     | Pd <sub>2</sub> (dba) <sub>3</sub>                  | 47                     |

<sup>a</sup> Reaction conditions: **1a** (0.2 mmol), **5a** (0.4 mmol), [Pd] (5 mol%), PPh<sub>3</sub> (12 mol%), LiO'Bu (1.2 equiv), LiCl (1.0 equiv) in DMF (2 mL) at 80 °C for 8.5 h. <sup>b</sup> Determined by GC analysis of the crude mixture using biphenyl as an internal standard. <sup>c</sup> Without PPh<sub>3</sub>. <sup>d</sup> Isolated yield. <sup>e</sup> With Pd<sub>2</sub>(dba)<sub>3</sub> (2.5 mol%).

**Table S6. Screening of bases.**

| entry <sup>a</sup> | base                            | yield (%) <sup>b</sup> |
|--------------------|---------------------------------|------------------------|
| 1                  | LiO'Bu                          | 85                     |
| 2                  | NaO'Bu                          | 57                     |
| 3                  | KO'Bu                           | 36                     |
| 4                  | LiHMDS                          | 75                     |
| 5                  | LiOH                            | 87(65) <sup>c</sup>    |
| 6                  | Li <sub>2</sub> CO <sub>3</sub> | —                      |
| 7                  | LiOMe                           | 88 (68) <sup>c</sup>   |
| 8                  | Cs <sub>2</sub> CO <sub>3</sub> | 22                     |
| 9                  | K <sub>3</sub> PO <sub>4</sub>  | 3                      |

<sup>a</sup> Reaction conditions: **1a** (0.2 mmol), **5a** (0.4 mmol), Pd(CH<sub>3</sub>CN)<sub>2</sub>Cl<sub>2</sub> (5 mol%), PPh<sub>3</sub> (12 mol%), base (1.2 equiv), LiCl (1.0 equiv) in DMF (2 mL) at 80 °C for 8.5 h. <sup>b</sup> Determined by GC analysis of the crude mixture using biphenyl as an internal standard. <sup>c</sup> Isolated yield.

**Table S7. Screening of solvents.**

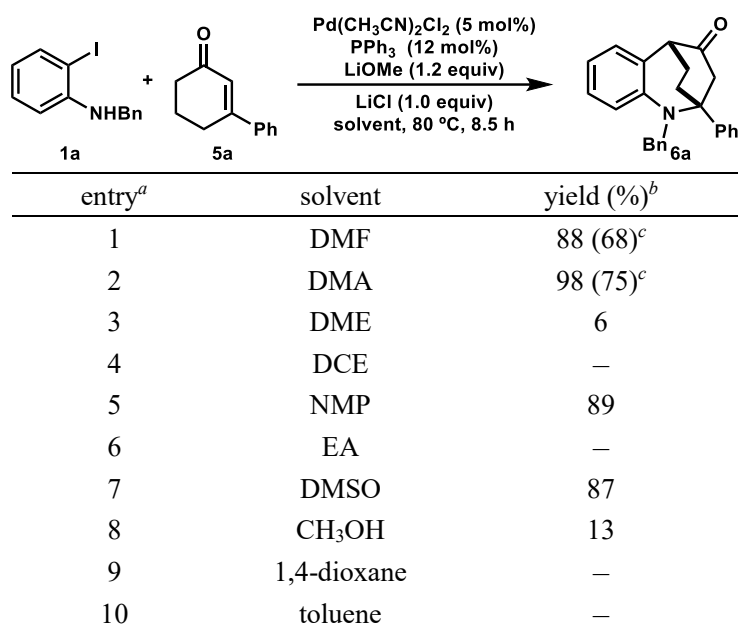

<sup>a</sup> Reaction conditions: **1a** (0.2 mmol), **5a** (0.4 mmol), Pd(CH<sub>3</sub>CN)<sub>2</sub>Cl<sub>2</sub> (5 mol%), PPh<sub>3</sub> (12 mol%), LiOMe (1.2 equiv), LiCl (1.0 equiv) in solvent (2 mL) at 80 °C for 8.5 h. <sup>b</sup> Determined by GC analysis of the crude mixture using biphenyl as an internal standard. <sup>c</sup> Isolated yield.

**Table S8. Screening of ligands and ratio of substrates.**

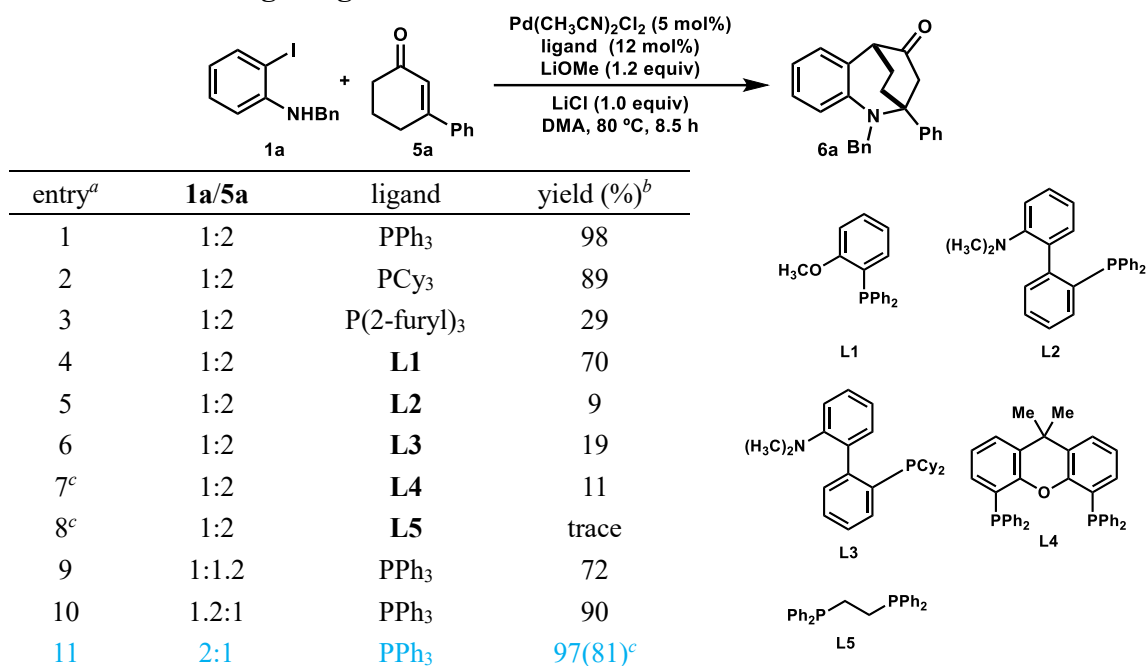

<sup>a</sup> Reaction conditions: **1a**, **5a**, Pd(CH<sub>3</sub>CN)<sub>2</sub>Cl<sub>2</sub> (5 mol%), ligand (12 mol%), LiOMe (1.2 equiv), LiCl (1.0 equiv) in DMA (2 mL) at 80 °C for 8.5 h. <sup>b</sup> Determined by GC analysis of the crude mixture using biphenyl as an internal standard. <sup>c</sup> Isolated yield.

**General procedure for condition optimization (Tables S5–S8):** In an argon-filled glovebox, to a screw capped vial equipped with a magnetic stirring bar were added Pd(CH<sub>3</sub>CN)<sub>2</sub>Cl<sub>2</sub> (0.01 mmol, 5 mol%), PPh<sub>3</sub> (0.024 mmol, 12 mol%), LiOMe (0.24 mmol,

1.2 equiv), LiCl (0.2 mmol, 1.0 equiv), **1a** (0.2 mmol, 1.0 equiv), 3-arylcyclohex-2-en-1-one **5a** (0.4 mmol, 2.0 equiv), and DMA (2 mL). The vial was sealed and stirred at 80 °C for 8.5 h. After removed from the glove box, the mixture was diluted with water (10 mL), and extracted with EA (10 mL × 3). Then the combined organic layers were washed with H<sub>2</sub>O (10 mL × 3) and brine, and then dried over anhydrous Na<sub>2</sub>SO<sub>4</sub>. Yield of **6a** was determined by GC analysis using biphenyl as an internal standard.

## Asymmetric Evaluation to Azabicyclo[3.2.2]nonan-ones **6a** (Tables S9)

**Table S9. Evaluation of chiral phosphine ligands.**

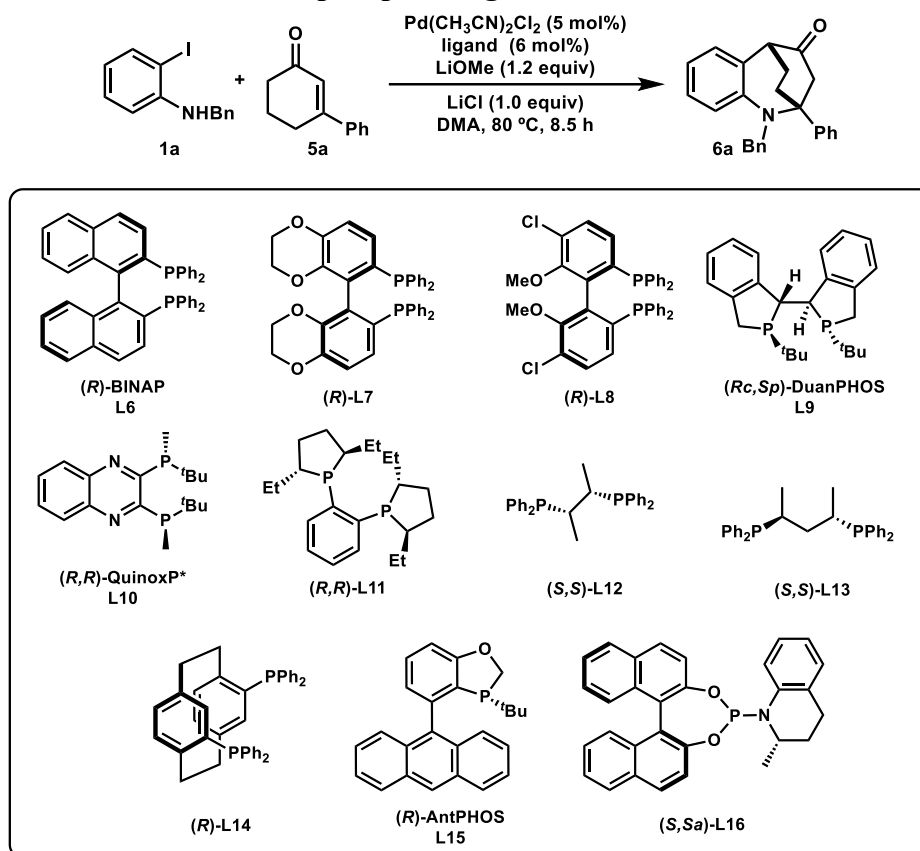

| entry <sup>a</sup> | ligand     | yield (%) <sup>b</sup> | ee (%) <sup>c</sup> | entry | ligand                 | yield (%) <sup>b</sup> | ee (%) <sup>c</sup> |
|--------------------|------------|------------------------|---------------------|-------|------------------------|------------------------|---------------------|
| 1                  | <b>L6</b>  | –                      | –                   | 7     | <b>L12</b>             | 67                     | <1                  |
| 2                  | <b>L7</b>  | 30                     | <1                  | 8     | <b>L13</b>             | 45                     | 4                   |
| 3                  | <b>L8</b>  | 44                     | 4                   | 9     | <b>L14</b>             | 29                     | 5                   |
| 4                  | <b>L9</b>  | –                      | –                   | 10    | <b>L15<sup>d</sup></b> | –                      | –                   |
| 5                  | <b>L10</b> | –                      | –                   | 11    | <b>L16<sup>d</sup></b> | 11                     | 8                   |
| 6                  | <b>L11</b> | –                      | –                   |       |                        |                        |                     |

<sup>a</sup> Reaction conditions: **1a**, **5a**, Pd(CH<sub>3</sub>CN)<sub>2</sub>Cl<sub>2</sub> (5 mol%), ligand (6 mol%), LiOMe (1.2 equiv), LiCl (1.0 equiv) in DMA (2 mL) at 80 °C for 8.5 h. <sup>b</sup> Determined by GC analysis of the crude mixture using biphenyl as an internal standard. <sup>c</sup> Determined by HPLC analysis (Chiralpak IB). <sup>d</sup> 12 mol% of ligand.

## Scheme S1. Unsuccessful Substrates

### 1) Unsuccessful aryl halide

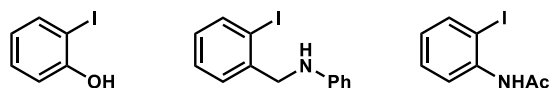

### 2) Unsuccessful acyclic aldehydes and ketones

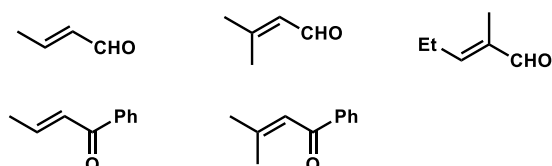

Substrates above were evaluated, either no reaction occurred, or an inseparable mixture was obtained.

## General Procedure and Spectroscopic Data for Pd-Catalyzed Cascade Vinylous Arylation/Aza-Michael Addition Reaction to Construct C2-Spiroindolines

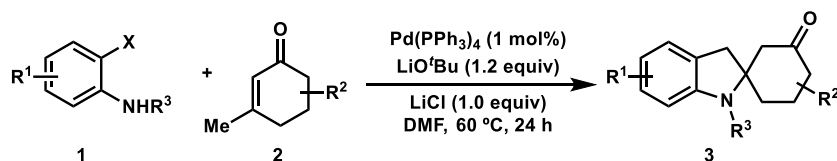

**General procedure:** In an argon-filled glove box, Pd(PPh<sub>3</sub>)<sub>4</sub> (0.002 mmol, 1 mol%), LiO<sup>t</sup>Bu (0.24 mmol, 1.2 equiv), LiCl (0.2 mmol, 1.0 equiv), **1** (0.2 mmol, 1.0 equiv), cyclohexenone **2** (0.4 mmol, 2.0 equiv), and DMF (2 mL) were added to a screw-capped vial equipped with a magnetic stirring bar. The vial was sealed and stirred at 60 °C for 24 h (or 100 °C for 2 h). After removed from the glove box, the mixture was diluted with water (10 mL), and extracted with EA (10 mL × 3). Then the combined organic layers were washed with H<sub>2</sub>O (10 mL × 3) and brine, and then dried over anhydrous Na<sub>2</sub>SO<sub>4</sub>. The solvents were removed under reduced pressure and the crude mixture was purified by silica gel chromatography to provide the desired product **3**.

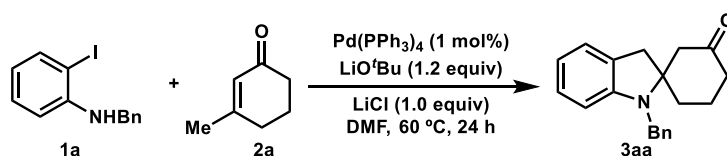

**1'-Benzylspiro[cyclohexane-1,2'-indolin]-3-one 3aa:** General procedure was followed. The reaction was performed with Pd(PPh<sub>3</sub>)<sub>4</sub> (2.4 mg, 0.002 mmol, 1 mol%), LiO<sup>t</sup>Bu (19.9 mg, 0.24 mmol, 1.2 equiv), LiCl (8.6 mg, 0.2 mmol, 1 equiv), **1a** (62.1 mg, 0.2 mmol, 1 equiv), and 3-methylcyclohex-2-en-1-one **2a** (44 μL, 0.4 mmol, 2 equiv) in DMF (2 mL) at 60 °C for 24 h. The desired product **3aa** (46.3 mg, 80%) was obtained as a white solid



after purification by silica gel chromatography (PE / CH<sub>2</sub>Cl<sub>2</sub> = 2 / 1 with 0.5% EA). *R<sub>f</sub>* = 0.5 (PE / EA = 5 / 1); mp: 138 – 142 °C; <sup>1</sup>H NMR (400 MHz, C<sub>6</sub>D<sub>6</sub>) δ 7.25 – 7.17 (m, 4H), 7.11 (t, *J* = 6.9 Hz, 1H), 6.98 – 6.88 (m, 2H), 6.72 – 6.63 (m, 1H), 6.13 (d, *J* = 7.7 Hz, 1H), 3.86 (AB, *J* = 16.5 Hz, 1H), 3.74 (BA, *J* = 16.5 Hz, 1H), 2.65 (AB, *J* = 15.3 Hz, 1H), 2.46 (BA, *J* = 15.4 Hz, 1H), 2.34 (dt, *J* = 12.9, 2.3 Hz, 1H), 2.15 – 2.06 (m, 1H), 1.91 (d, *J* = 12.9 Hz, 1H), 1.63 (ddd, *J* = 16.5, 11.2, 6.5 Hz, 1H), 1.44 – 1.06 (m, 4H); <sup>13</sup>C NMR (100 MHz, C<sub>6</sub>D<sub>6</sub>) δ 207.0, 150.7, 140.0, 128.9, 128.2, 127.2, 126.9, 126.7, 124.8, 118.2, 107.3, 71.2, 48.8, 47.1, 40.6, 39.8, 33.9, 20.9; HRMS (ESI<sup>+</sup>): calc'd for C<sub>20</sub>H<sub>21</sub>NNaO [M+Na]<sup>+</sup>: 314.1515; found: 314.1520.

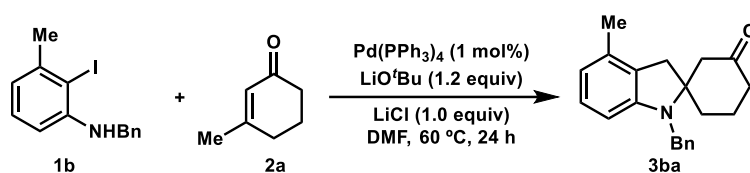

**1'-Benzyl-4'-methylspiro[cyclohexane-1,2'-indolin]-3-one 3ba:** General procedure was followed. The reaction was performed with Pd(PPh<sub>3</sub>)<sub>4</sub> (1.2 mg, 0.001 mmol, 1 mol%), LiO'Bu (9.3 mg, 0.12 mmol, 1.2 equiv), LiCl (4.3 mg, 0.1 mmol, 1.0 equiv), **1b** (33.0 mg, 0.1 mmol, 1.0 equiv), and 3-methylcyclohex-2-en-1-one **2a** (22 μL, 0.2 mmol, 2.0 equiv) in DMF (1 mL) at 60 °C for 24 h. The desired product **3ba** (25.0 mg, 82%) was obtained as a yellow solid after purification by silica gel chromatography (PE / CH<sub>2</sub>Cl<sub>2</sub> = 2 / 1 with 0.5% EA). *R<sub>f</sub>* = 0.5 (PE / EA = 5 / 1); mp: 104 – 106 °C; <sup>1</sup>H NMR (400 MHz, C<sub>6</sub>D<sub>6</sub>) δ 7.26 (d, *J* = 7.1 Hz, 2H), 7.21 (t, *J* = 7.5 Hz, 2H), 7.12 (t, *J* = 7.1 Hz, 1H), 6.90 (t, *J* = 7.7 Hz, 1H), 6.53 (d, *J* = 7.6 Hz, 1H), 6.03 (d, *J* = 7.8 Hz, 1H), 3.89 (AB, *J* = 16.5 Hz, 1H), 3.79 (BA, *J* = 16.5 Hz, 1H), 2.69 (AB, *J* = 15.3 Hz, 1H), 2.43 (BA, *J* = 15.4 Hz, 1H), 2.36 (dt, *J* = 12.8, 2.3 Hz, 1H), 2.18 – 2.08 (m, 1H), 2.01 (s, 3H), 1.95 (d, *J* = 12.8 Hz, 1H), 1.65 (td, *J* = 13.6, 6.3 Hz, 1H), 1.46 – 1.38 (m, 1H), 1.37 – 1.11 (m, 3H); <sup>13</sup>C NMR (100 MHz, C<sub>6</sub>D<sub>6</sub>) δ 207.2, 150.5, 140.2, 133.9, 128.9, 128.3, 127.2, 126.9, 125.0, 119.7, 104.9, 71.0, 49.2, 47.2, 40.6, 38.6, 34.1, 20.9, 18.6; HRMS (ESI<sup>+</sup>): calc'd for C<sub>21</sub>H<sub>23</sub>NNaO [M+Na]<sup>+</sup>: 328.1672; found: 328.1666.

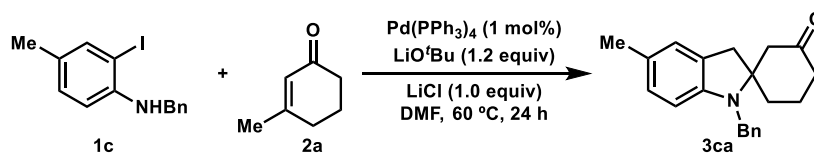

**1'-Benzyl-5'-methylspiro[cyclohexane-1,2'-indolin]-3-one 3ca:** General procedure was followed. The reaction was performed with Pd(PPh<sub>3</sub>)<sub>4</sub> (2.2 mg, 0.002 mmol, 1 mol%), LiO'Bu (19.6 mg, 0.24 mmol, 1.2 equiv), LiCl (8.8 mg, 0.2 mmol, 1.0 equiv), **1c** (64.8 mg, 0.2 mmol, 1.0 equiv), and 3-methylcyclohex-2-en-1-one **2a** (44 μL, 0.4 mmol, 2.0 equiv) in DMF (2 mL) at 60 °C for 24 h. The desired product **3ca** (46.8 mg, 77%) was obtained as a white solid after purification by silica gel chromatography (PE / CH<sub>2</sub>Cl<sub>2</sub> = 2 / 1 with 0.5% EA). *R<sub>f</sub>* = 0.5 (PE / EA = 5 / 1); mp: 92 – 93 °C; <sup>1</sup>H NMR (400 MHz, C<sub>6</sub>D<sub>6</sub>) δ 7.27 (d, *J* = 7.1 Hz, 2H), 7.21 (t, *J* = 7.5 Hz, 2H), 7.12 (t, *J* = 7.2 Hz, 1H), 6.78 – 6.71 (m, 2H), 6.08 (d, *J* = 8.3 Hz, 1H), 3.87 (AB, *J* = 16.4 Hz, 1H), 3.73 (BA, *J* = 16.4

Hz, 1H), 2.67 (AB,  $J = 15.2$  Hz, 1H), 2.49 (BA,  $J = 15.3$  Hz, 1H), 2.38 (dt,  $J = 12.8, 2.3$  Hz, 1H), 2.17 (s, 3H), 2.16 – 2.10 (m, 1H), 1.92 (d,  $J = 12.8$  Hz, 1H), 1.65 (td,  $J = 13.5, 6.3$  Hz, 1H), 1.49 – 1.14 (m, 4H);  $^{13}\text{C}$  NMR (100 MHz,  $\text{C}_6\text{D}_6$ )  $\delta$  207.2, 148.7, 140.2, 128.8, 128.2, 127.2, 127.02, 127.00, 126.9, 125.8, 107.1, 71.5, 48.5, 47.5, 40.6, 39.8, 33.9, 21.0, 20.9; HRMS (ESI<sup>+</sup>): calc'd for  $\text{C}_{21}\text{H}_{23}\text{NNaO}$   $[\text{M}+\text{Na}]^+$ : 328.1672; found: 328.1673.

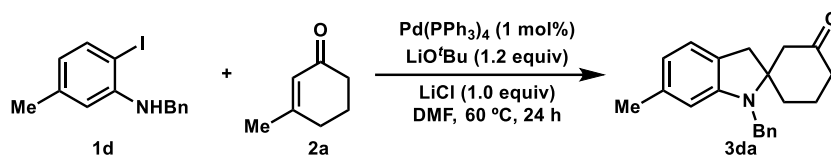

**1'-Benzyl-6'-methylspiro[cyclohexane-1,2'-indolin]-3-one 3da:** General procedure was followed. The reaction was performed with  $\text{Pd}(\text{PPh}_3)_4$  (2.5 mg, 0.002 mmol, 1 mol%),  $\text{LiO}^t\text{Bu}$  (19.3 mg, 0.24 mmol, 1.2 equiv),  $\text{LiCl}$  (8.7 mg, 0.2 mmol, 1.0 equiv), **1d** (64.8 mg, 0.2 mmol, 1.0 equiv), and 3-methylcyclohex-2-en-1-one **2a** (44  $\mu\text{L}$ , 0.4 mmol, 2.0 equiv) in DMF (2 mL) at 60 °C for 24 h. The desired product **3da** (50.5 mg, 83%) was obtained as a white solid after purification by silica gel chromatography (PE /  $\text{CH}_2\text{Cl}_2 = 2 / 1$  with 0.5% EA).  $R_f = 0.6$  (PE / EA = 5 / 1); mp: 89 – 91 °C;  $^1\text{H}$  NMR (400 MHz,  $\text{CDCl}_3$ )  $\delta$  7.27 (d,  $J = 7.1$  Hz, 2H), 7.20 (t,  $J = 7.5$  Hz, 2H), 7.11 (t,  $J = 7.2$  Hz, 1H), 6.89 (d,  $J = 7.3$  Hz, 1H), 6.53 (d,  $J = 7.3$  Hz, 1H), 6.06 (s, 1H), 3.90 (AB,  $J = 16.6$  Hz, 1H), 3.80 (BA,  $J = 16.6$  Hz, 1H), 2.66 (AB,  $J = 15.2$  Hz, 1H), 2.47 (BA,  $J = 15.2$  Hz, 1H), 2.38 (dt,  $J = 12.9, 2.3$  Hz, 1H), 2.17 – 2.08 (m, 1H), 2.06 (s, 3H), 1.93 (d,  $J = 12.9$  Hz, 1H), 1.64 (td,  $J = 13.6, 6.2$  Hz, 1H), 1.46 – 1.08 (m, 4H);  $^{13}\text{C}$  NMR (100 MHz,  $\text{C}_6\text{D}_6$ )  $\delta$  207.1, 151.0, 140.2, 137.6, 128.9, 127.2, 126.8, 124.7, 123.9, 118.8, 107.9, 71.5, 48.7, 47.0, 40.6, 39.5, 34.0, 21.8, 21.0; HRMS (ESI<sup>+</sup>): calc'd for  $\text{C}_{21}\text{H}_{23}\text{NNaO}$   $[\text{M}+\text{Na}]^+$ : 328.1672; found: 328.1674.

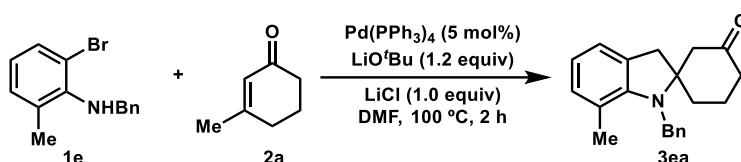

**1'-Benzyl-7'-methylspiro[cyclohexane-1,2'-indolin]-3-one 3ea:** General procedure was followed. The reaction was performed with  $\text{Pd}(\text{PPh}_3)_4$  (11.8 mg, 0.01 mmol, 5 mol%),  $\text{LiO}^t\text{Bu}$  (19.1 mg, 0.24 mmol, 1.2 equiv),  $\text{LiCl}$  (8.3 mg, 0.2 mmol, 1.0 equiv), **1e** (54.6 mg, 0.2 mmol, 1.0 equiv), and 3-methylcyclohex-2-en-1-one **2a** (44  $\mu\text{L}$ , 0.4 mmol, 2.0 equiv) in DMF (2 mL) at 100 °C for 2 h. The desired product **3ea** (49.1 mg, 80%) was obtained as a white solid after purification by silica gel chromatography (PE /  $\text{CH}_2\text{Cl}_2 = 2 / 1$  with 0.5% EA).  $R_f = 0.5$  (PE / EA = 5 / 1); mp: 103 – 105 °C;  $^1\text{H}$  NMR (400 MHz,  $\text{C}_6\text{D}_6$ )  $\delta$  7.24 – 7.13 (m, 4H), 7.09 (t,  $J = 6.8$  Hz, 1H), 6.88 (d,  $J = 7.1$  Hz, 1H), 6.79 (d,  $J = 7.1$  Hz, 1H), 6.69 (t,  $J = 7.3$  Hz, 1H), 4.35 (AB,  $J = 18.3$  Hz, 1H), 4.07 (BA,  $J = 18.3$  Hz, 1H), 2.66 (AB,  $J = 15.3$  Hz, 1H), 2.45 (BA,  $J = 15.3$  Hz, 1H), 2.40 (dt,  $J = 12.9, 2.3$  Hz, 1H), 2.12 – 1.98 (m, 2H), 2.06 (s, 3H), 1.56 (td,  $J = 13.4, 6.3$  Hz, 1H), 1.41 – 1.30 (m, 1H), 1.30 – 1.20 (m, 2H), 1.20 – 1.04 (m, 1H);  $^{13}\text{C}$  NMR (100 MHz,  $\text{C}_6\text{D}_6$ )  $\delta$  207.2, 148.5, 142.8, 132.3, 128.8, 127.1, 126.9, 126.3, 123.2, 118.4, 117.2, 70.4, 49.5, 47.2, 40.5, 40.1, 34.3, 20.9, 19.2; HRMS (ESI<sup>+</sup>): calc'd for

C<sub>21</sub>H<sub>23</sub>NNaO [M+Na]<sup>+</sup>: 328.1672; found: 328.1675.

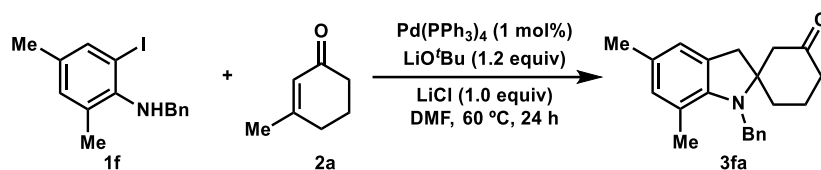

**1'-Benzyl-5',7'-dimethylspiro[cyclohexane-1,2'-indolin]-3-one 3fa**: General procedure was followed. The reaction was performed with Pd(PPh<sub>3</sub>)<sub>4</sub> (2.7 mg, 0.002 mmol, 1 mol%), LiO<sup>t</sup>Bu (19.3 mg, 0.24 mmol, 1.2 equiv), LiCl (9.3 mg, 0.2 mmol, 1.0 equiv), **1f** (72.0 mg, 0.2 mmol, 1.0 equiv), and 3-methylcyclohex-2-en-1-one **2a** (44 μL, 0.4 mmol, 2.0 equiv) in DMF (2 mL) at 60 °C for 24 h. The desired product **3fa** (51.5 mg, 75%) was obtained as a white solid after purification by silica gel chromatography (PE / CH<sub>2</sub>Cl<sub>2</sub> = 2 / 1 with 0.5% EA). R<sub>f</sub> = 0.5 (PE / EA = 5 / 1); mp: 119 – 121 °C; <sup>1</sup>H NMR (400 MHz, C<sub>6</sub>D<sub>6</sub>) δ 7.25 (d, *J* = 7.1 Hz, 2H), 7.19 (t, *J* = 7.6 Hz, 2H), 7.10 (t, *J* = 7.2 Hz, 1H), 6.67 (s, 1H), 6.59 (s, 1H), 4.33 (AB, *J* = 18.1 Hz, 1H), 4.06 (BA, *J* = 18.2 Hz, 1H), 2.67 (AB, *J* = 15.2 Hz, 1H), 2.54 – 2.40 (m, 2H), 2.20 (s, 3H), 2.12 – 1.97 (m, 5H), 1.58 (td, *J* = 13.4, 6.3 Hz, 1H), 1.45 – 1.07 (m, 4H); <sup>13</sup>C NMR (100 MHz, C<sub>6</sub>D<sub>6</sub>) δ 207.5, 146.8, 143.0, 132.6, 128.8, 127.6, 127.3, 126.9, 126.5, 124.0, 117.3, 70.7, 49.4, 47.6, 40.6, 40.2, 34.3, 21.0, 20.7, 19.0; HRMS (ESI<sup>+</sup>): calc'd for C<sub>22</sub>H<sub>25</sub>NNaO [M+Na]<sup>+</sup>: 342.1828; found: 342.1833.

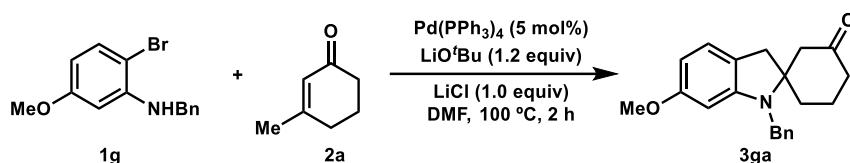

**1'-Benzyl-6'-methoxyspiro[cyclohexane-1,2'-indolin]-3-one 3ga**: General procedure was followed with slight modification. The reaction was performed with Pd(PPh<sub>3</sub>)<sub>4</sub> (11.6 mg, 0.01 mmol, 5 mol%), LiO<sup>t</sup>Bu (18.8 mg, 0.24 mmol, 1.2 equiv), LiCl (8.4 mg, 0.2 mmol, 1.0 equiv), **1g** (63.1 mg, 0.2 mmol, 1.0 equiv), and 3-methylcyclohex-2-en-1-one **2a** (44 μL, 0.4 mmol, 2.0 equiv) in DMF (2 mL) at 100 °C for 2 h. The desired product **3ga** (52.3 mg, 81%) was obtained as a white solid after purification by silica gel chromatography (PE / CH<sub>2</sub>Cl<sub>2</sub> = 2 / 1 with 0.5% EA). R<sub>f</sub> = 0.5 (PE / EA = 5 / 1); mp: 105 – 108 °C; <sup>1</sup>H NMR (400 MHz, C<sub>6</sub>D<sub>6</sub>) δ 7.22 (d, *J* = 7.2 Hz, 2H), 7.19 – 7.14 (m, 2H), 7.09 (t, *J* = 7.1 Hz, 1H), 6.85 (d, *J* = 7.9 Hz, 1H), 6.21 (d, *J* = 7.9 Hz, 1H), 5.97 (s, 1H), 3.85 (AB, *J* = 16.5 Hz, 1H), 3.74 (BA, *J* = 16.4 Hz, 1H), 3.30 (s, 3H), 2.65 (AB, *J* = 14.9 Hz, 1H), 2.46 (BA, *J* = 14.9 Hz, 1H), 2.39 (dt, *J* = 12.8, 2.0 Hz, 1H), 2.17 – 2.07 (m, 1H), 1.92 (d, *J* = 12.8 Hz, 1H), 1.72 – 1.58 (m, 1H), 1.41 (d, *J* = 12.7 Hz, 1H), 1.37 – 1.11 (m, 3H); <sup>13</sup>C NMR (100 MHz, C<sub>6</sub>D<sub>6</sub>) δ 207.0, 161.2, 152.1, 139.9, 128.9, 127.2, 126.9, 124.9, 119.0, 101.7, 95.4, 71.9, 54.8, 48.8, 47.0, 40.6, 39.1, 34.0, 21.0; HRMS (ESI<sup>+</sup>): calc'd for C<sub>21</sub>H<sub>23</sub>NNaO<sub>2</sub> [M+Na]<sup>+</sup>: 344.1621; found: 344.1618.

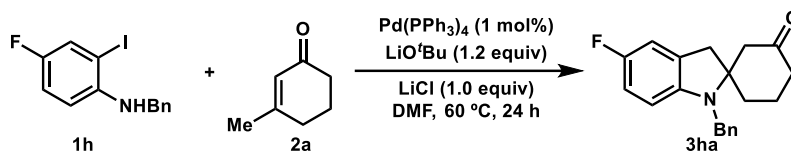

**1'-Benzyl-5'-fluorospiro[cyclohexane-1,2'-indolin]-3-one 3ha:** General procedure was followed. The reaction was performed with Pd(PPh<sub>3</sub>)<sub>4</sub> (2.5 mg, 0.002 mmol, 1 mol%), LiO<sup>t</sup>Bu (19.5 mg, 0.24 mmol, 1.2 equiv), LiCl (8.4 mg, 0.2 mmol, 1.0 equiv), **1h** (64.6 mg, 0.2 mmol, 1.0 equiv), and 3-methylcyclohex-2-en-1-one **2a** (44 μL, 0.4 mmol, 2.0 equiv) in DMF (2 mL) at 60 °C for 24 h. The desired product **3ha** (45.6 mg, 74%) was obtained as yellow liquid after purification by silica gel chromatography (PE / CH<sub>2</sub>Cl<sub>2</sub> = 2 / 1 with 0.5% EA). *R<sub>f</sub>* = 0.5 (PE / EA = 5 / 1); <sup>1</sup>H NMR (400 MHz, acetone-*d*<sub>6</sub>) δ 7.42 (d, *J* = 7.1 Hz, 2H), 7.34 (t, *J* = 7.5 Hz, 2H), 7.25 (t, *J* = 7.3 Hz, 1H), 6.91 – 6.84 (m, 1H), 6.67 – 6.59 (m, 1H), 5.98 (dd, *J* = 8.5, 4.2 Hz, 1H), 4.52 (AB, *J* = 16.4 Hz, 1H), 4.18 (BA, *J* = 16.4 Hz, 1H), 2.93 (AB, *J* = 15.7 Hz, 1H), 2.79 (BA, *J* = 15.6 Hz, 1H), 2.83 (d, *J* = 12.6 Hz, 1H), 2.46 (td, *J* = 13.8, 6.6 Hz, 1H), 2.33 – 2.19 (m, 3H), 2.12 – 2.03 (m, 1H), 2.02 – 1.92 (m, 1H), 1.78 – 1.64 (m, 1H); <sup>13</sup>C NMR (100 MHz, acetone-*d*<sub>6</sub>) δ 208.8, 157.0 (d, *J* = 232.2 Hz), 148.0, 140.7, 129.6 (d, *J* = 8.4 Hz), 129.3, 127.6, 127.5, 113.5 (d, *J* = 22.9 Hz), 112.9 (d, *J* = 24.5 Hz), 107.1 (d, *J* = 8.2 Hz), 72.9, 49.0, 47.9, 41.0, 40.2, 34.2, 21.7; <sup>19</sup>F NMR (376 MHz, acetone-*d*<sub>6</sub>) δ –129.5; HRMS (ESI<sup>+</sup>): calc'd for C<sub>20</sub>H<sub>20</sub>FNNaO [M+Na]<sup>+</sup>: 332.1421; found: 332.1428.

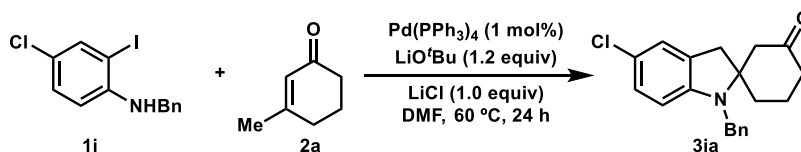

**1'-Benzyl-5'-chlorospiro[cyclohexane-1,2'-indolin]-3-one 3ia:** General procedure was followed. The reaction was performed with Pd(PPh<sub>3</sub>)<sub>4</sub> (2.4 mg, 0.002 mmol, 1 mol%), LiO<sup>t</sup>Bu (19.5 mg, 0.24 mmol, 1.2 equiv), LiCl (8.4 mg, 0.2 mmol, 1.0 equiv), **1i** (69.0 mg, 0.2 mmol, 1.0 equiv), and 3-methylcyclohex-2-en-1-one **2a** (44 μL, 0.4 mmol, 2.0 equiv) in DMF (2 mL) at 60 °C for 24 h. The desired product **3ia** (43.9 mg, 68%) was obtained as a white solid after purification by silica gel chromatography (PE / CH<sub>2</sub>Cl<sub>2</sub> = 2 / 1 with 0.5% EA). *R<sub>f</sub>* = 0.4 (PE / EA = 5 / 1); mp: 116 – 118 °C; <sup>1</sup>H NMR (400 MHz, C<sub>6</sub>D<sub>6</sub>) δ 7.23 – 7.08 (m, 5H), 6.90 – 6.83 (m, 2H), 5.81 (d, *J* = 8.1 Hz, 1H), 3.75 (AB, *J* = 16.6 Hz, 1H), 3.60 (BA, *J* = 16.5 Hz, 1H), 2.44 (AB, *J* = 15.7 Hz, 1H), 2.28 – 2.21 (m, 2H), 2.04 – 2.14 (m, 1H), 1.84 (d, *J* = 12.9 Hz, 1H), 1.60 (td, *J* = 13.6, 6.5 Hz, 1H), 1.36 – 1.01 (m, 4H); <sup>13</sup>C NMR (100 MHz, C<sub>6</sub>D<sub>6</sub>) δ 206.6, 149.1, 139.3, 128.9, 128.7, 127.7, 127.4, 126.7, 125.2, 122.6, 107.6, 71.5, 48.7, 46.9, 40.5, 39.3, 33.7, 20.7; HRMS (ESI<sup>+</sup>): calc'd for C<sub>20</sub>H<sub>20</sub>ClNNaO [M+Na]<sup>+</sup>: 348.1126; found: 348.1120.

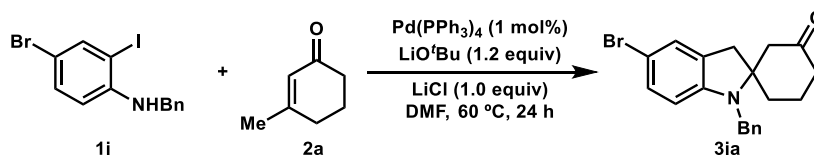

**1'-Benzyl-5'-bromospiro[cyclohexane-1,2'-indolin]-3-one 3ja:** General procedure was

followed. The reaction was performed with Pd(PPh<sub>3</sub>)<sub>4</sub> (2.3 mg, 0.002 mmol, 1 mol%), LiO<sup>t</sup>Bu (18.8 mg, 0.24 mmol, 1.2 equiv), LiCl (8.4 mg, 0.2 mmol, 1.0 equiv), **1j** (76.6 mg, 0.2 mmol, 1.0 equiv), and 3-methylcyclohex-2-en-1-one **2a** (44 μL, 0.4 mmol, 2.0 equiv) in DMF (2 mL) at 60 °C for 24 h. The desired product **3ja** (39.0 mg, 53%) was obtained as a white solid after purification by silica gel chromatography (PE / CH<sub>2</sub>Cl<sub>2</sub> = 2 / 1 with 0.5% EA). R<sub>f</sub> = 0.5 (PE / EA = 5 / 1); mp: 128 – 130 °C; <sup>1</sup>H NMR (400 MHz, C<sub>6</sub>D<sub>6</sub>) δ 7.22 – 7.15 (m, 2H), 7.14 – 7.08 (m, 3H), 7.03 – 6.95 (m, 2H), 5.76 (d, *J* = 8.2 Hz, 1H), 3.74 (AB, *J* = 16.6 Hz, 1H), 3.59 (BA, *J* = 16.6 Hz, 1H), 2.43 (AB, *J* = 15.7 Hz, 1H), 2.28 – 2.19 (m, 2H), 2.13 – 2.01 (m, 1H), 1.83 (d, *J* = 12.9 Hz, 1H), 1.59 (td, *J* = 13.6, 6.4 Hz, 1H), 1.34 – 0.98 (m, 4H); <sup>13</sup>C NMR (100 MHz, C<sub>6</sub>D<sub>6</sub>) δ 206.5, 149.5, 139.3, 130.6, 129.1, 128.9, 128.0, 127.4, 126.7, 109.6, 108.2, 71.4, 48.7, 46.8, 40.4, 39.3, 33.7, 20.7; HRMS (ESI<sup>+</sup>): calc'd for C<sub>20</sub>H<sub>20</sub>BrNNaO [M+Na]<sup>+</sup>: 392.0620; found: 392.0617.

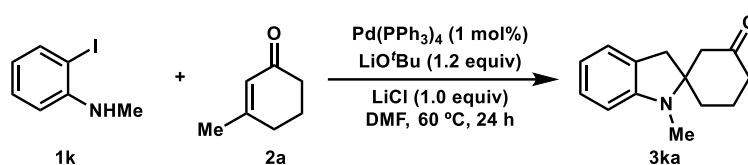

**1'-Methylspiro[cyclohexane-1,2'-indolin]-3-one 3ka**: General procedure was followed. The reaction was performed with Pd(PPh<sub>3</sub>)<sub>4</sub> (2.4 mg, 0.002 mmol, 1 mol%), LiO<sup>t</sup>Bu (20.2 mg, 0.24 mmol, 1.2 equiv), LiCl (8.4 mg, 0.2 mmol, 1.0 equiv), **1k** (48.2 mg, 0.2 mmol, 1.0 equiv), and 3-methylcyclohex-2-en-1-one **2a** (44 μL, 0.4 mmol, 2.0 equiv) in DMF (2 mL) at 60 °C for 24 h. The desired product **3ka** (40.2 mg, 93%) was obtained as a colorless liquid after purification by silica gel chromatography (PE / CH<sub>2</sub>Cl<sub>2</sub> = 2 / 1 with 0.5% EA). R<sub>f</sub> = 0.5 (PE / EA = 5 / 1); <sup>1</sup>H NMR (400 MHz, C<sub>6</sub>D<sub>6</sub>) δ 7.12 (t, *J* = 7.7 Hz, 1H), 6.92 (dd, *J* = 7.1, 0.7 Hz, 1H), 6.72 (td, *J* = 7.5, 0.8 Hz, 1H), 6.25 (d, *J* = 7.8 Hz, 1H), 2.55 (AB, *J* = 15.3 Hz, 1H), 2.36 (BA, *J* = 15.3 Hz, 1H), 2.23 (s, 3H), 2.21 – 2.15 (m, 1H), 2.15 – 2.06 (m, 1H), 1.94 (AB, *J* = 12.8 Hz, 1H), 1.65 (tdd, *J* = 13.7, 6.3, 0.7 Hz, 1H), 1.41 – 1.24 (m, 3H), 1.22 – 1.06 (m, 1H); <sup>13</sup>C NMR (100 MHz, C<sub>6</sub>D<sub>6</sub>) δ 207.3, 151.5, 127.0, 124.8, 118.0, 106.4, 70.9, 47.5, 40.6, 39.4, 32.9, 28.0, 20.9; HRMS (ESI<sup>+</sup>): calc'd for C<sub>14</sub>H<sub>17</sub>NNaO [M+Na]<sup>+</sup>: 238.1202; found: 238.1203.

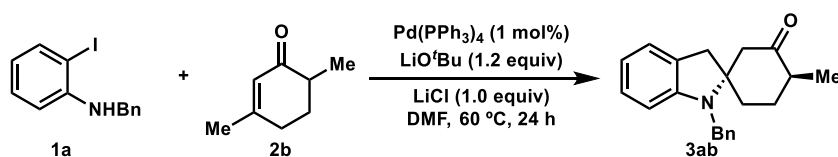

**1'-Benzyl-4-methylspiro[cyclohexane-1,2'-indolin]-3-one 3ab**: General procedure was followed. The reaction was performed with Pd(PPh<sub>3</sub>)<sub>4</sub> (2.4 mg, 0.002 mmol, 1 mol%), LiO<sup>t</sup>Bu (19.2 mg, 0.24 mmol, 1.2 equiv), LiCl (8.4 mg, 0.2 mmol, 1.0 equiv), **1a** (62.7 mg, 0.2 mmol, 1.0 equiv), and 3,6-dimethylcyclohex-2-en-1-one **2b** (49.5 mg, 0.4 mmol, 2.0 equiv) in DMF (2 mL) at 60 °C for 24 h. The desired product **3ab** (47.2 mg, 74%) was obtained as a white solid after purification by silica gel chromatography (PE / CH<sub>2</sub>Cl<sub>2</sub> = 2 / 1 with 0.5% EA). R<sub>f</sub> = 0.5 (PE / EA = 5 / 1); mp: 125 – 127 °C; <sup>1</sup>H NMR (400 MHz, C<sub>6</sub>D<sub>6</sub>) δ 7.28 – 7.17 (m, 4H), 7.12 (t, *J* = 7.1 Hz, 1H), 6.93 (t, *J* = 7.8 Hz, 2H), 6.69 (t, *J* = 6.9 Hz, 1H), 6.15 (d, *J* = 7.7 Hz, 1H), 3.92 (AB, *J* = 16.5 Hz, 1H), 3.79 (BA, *J* = 16.5

Hz, 1H), 2.66 (AB,  $J = 15.4$  Hz, 1H), 2.44 (BA,  $J = 15.4$  Hz, 1H), 2.36 (AB,  $J = 12.3$  Hz, 1H), 1.96 (BA,  $J = 12.3$  Hz, 1H), 1.77 – 1.63 (m, 1H), 1.54 – 1.31 (m, 3H), 1.01 (d,  $J = 6.5$  Hz, 3H), 0.99 – 0.83 (m, 1H);  $^{13}\text{C}$  NMR (100 MHz,  $\text{C}_6\text{D}_6$ )  $\delta$  208.2, 150.7, 140.0, 128.9, 127.2, 126.9, 126.8, 124.9, 118.2, 107.1, 71.9, 48.6, 47.1, 44.1, 39.7, 34.5, 30.1, 14.4; HRMS (ESI<sup>+</sup>): calc'd for  $\text{C}_{21}\text{H}_{23}\text{NNaO}$  [ $\text{M}+\text{Na}$ ]<sup>+</sup>: 328.1672; found: 328.1677.

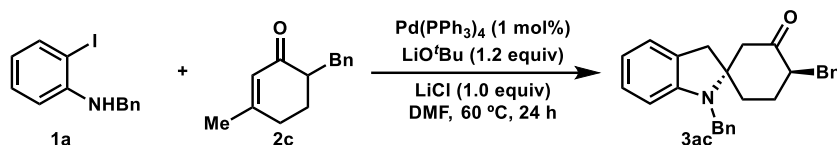

**1',4-Dibenzylspiro[cyclohexane-1,2'-indolin]-3-one 3ac:** General procedure was followed. The reaction was performed with  $\text{Pd}(\text{PPh}_3)_4$  (2.4 mg, 0.002 mmol, 1 mol%),  $\text{LiO}^t\text{Bu}$  (19.2 mg, 0.24 mmol, 1.2 equiv),  $\text{LiCl}$  (8.4 mg, 0.2 mmol, 1.0 equiv), **1a** (62.7 mg, 0.2 mmol, 1.0 equiv), and 6-benzyl-3-methylcyclohex-2-en-1-one **2c** (82.0 mg, 0.4 mmol, 2.0 equiv) in DMF (2 mL) at 60 °C for 24 h. The desired product **3ac** (61.7 mg, 81%) was obtained as a white solid after purification by silica gel chromatography (PE /  $\text{CH}_2\text{Cl}_2 = 2 / 1$  with 0.5% EA).  $R_f = 0.5$  (PE / EA = 5 / 1); mp: 132 – 136 °C;  $^1\text{H}$  NMR (400 MHz,  $\text{C}_6\text{D}_6$ )  $\delta$  7.25 – 7.17 (m, 6H), 7.14 – 7.08 (m, 4H), 6.89 – 6.99 (m, 2H), 6.70 (t,  $J = 7.0$  Hz, 1H), 6.14 (d,  $J = 7.8$  Hz, 1H), 3.86 (AB,  $J = 16.6$  Hz, 1H), 3.75 (BA,  $J = 16.6$  Hz, 1H), 3.33 (dd,  $J = 13.9, 5.1$  Hz, 1H), 2.73 (AB,  $J = 15.4$  Hz, 1H), 2.45 (BA,  $J = 15.4$  Hz, 1H), 2.40 – 2.32 (m, 2H), 2.09 – 1.94 (m, 1H), 1.90 (d,  $J = 12.2$  Hz, 1H), 1.52 – 1.42 (m, 1H), 1.39 – 1.30 (m, 1H), 1.20 (td,  $J = 13.2, 4.2$  Hz, 1H), 0.97 – 0.83 (m, 1H);  $^{13}\text{C}$  NMR (100 MHz,  $\text{C}_6\text{D}_6$ )  $\delta$  207.4, 150.7, 140.9, 140.0, 129.6, 128.9, 128.7, 127.9, 127.2, 126.8, 126.7, 126.4, 124.7, 118.2, 107.1, 72.0, 51.6, 48.9, 47.1, 39.7, 35.6, 34.4, 27.8; HRMS (ESI<sup>+</sup>): calc'd for  $\text{C}_{27}\text{H}_{27}\text{NNaO}$  [ $\text{M}+\text{Na}$ ]<sup>+</sup>: 404.1985; found: 404.1989.

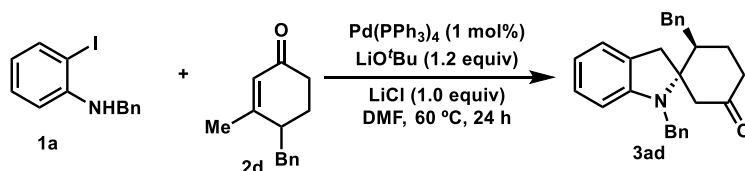

**1',2-Dibenzylspiro[cyclohexane-1,2'-indolin]-5-one 3ad:** General procedure was followed. The reaction was performed with  $\text{Pd}(\text{PPh}_3)_4$  (2.3 mg, 0.002 mmol, 1 mol%),  $\text{LiO}^t\text{Bu}$  (19.3 mg, 0.24 mmol, 1.2 equiv),  $\text{LiCl}$  (8.8 mg, 0.2 mmol, 1.0 equiv), **1a** (62.2 mg, 0.2 mmol, 1.0 equiv), and 4-benzyl-3-methylcyclohex-2-en-1-one **2d** (81.2 mg, 0.4 mmol, 2.0 equiv) in DMF (2 mL) at 60 °C for 24 h. The desired product **3ad** (56.1 mg, 74%) was obtained as a white solid after purification by silica gel chromatography (PE /  $\text{CH}_2\text{Cl}_2 = 2 / 1$  with 0.5% EA).  $R_f = 0.5$  (PE / EA = 5 / 1); mp: 131 – 133 °C;  $^1\text{H}$  NMR (400 MHz,  $\text{CDCl}_3$ )  $\delta$  7.45 (d,  $J = 7.3$  Hz, 2H), 7.37 (t,  $J = 7.4$  Hz, 2H), 7.30 (t,  $J = 7.2$  Hz, 1H), 7.25 – 7.15 (m, 3H), 7.12 (d,  $J = 7.1$  Hz, 1H), 7.00 (t,  $J = 7.6$  Hz, 1H), 6.87 (d,  $J = 6.5$  Hz, 2H), 6.69 (t,  $J = 7.3$  Hz, 1H), 6.23 (d,  $J = 7.8$  Hz, 1H), 4.58 (AB,  $J = 16.7$  Hz, 1H), 4.37 (BA,  $J = 16.7$  Hz, 1H), 3.22 (d,  $J = 12.1$  Hz, 1H), 3.15 (AB,  $J = 15.8$  Hz, 1H), 2.78 (BA,  $J = 15.8$  Hz, 1H), 2.67 – 2.50 (m, 2H), 2.39 – 2.30 (m, 1H), 2.30 – 2.11 (m, 3H), 2.05 – 1.95 (m, 1H), 1.43 (ddd,  $J = 25.7, 13.7, 4.7$  Hz, 1H);  $^{13}\text{C}$  NMR (100 MHz,  $\text{CDCl}_3$ )  $\delta$  209.5, 150.9, 140.6, 138.8, 129.2, 128.9, 128.5, 127.8, 127.2, 126.9, 126.3,

126.2, 124.7, 117.9, 107.0, 74.1, 50.2, 46.9, 44.6, 41.0, 36.5, 34.6, 26.0; HRMS (ESI+): calc'd for C<sub>27</sub>H<sub>27</sub>NNaO [M+Na]<sup>+</sup>: 404.1985; found: 404.1985.

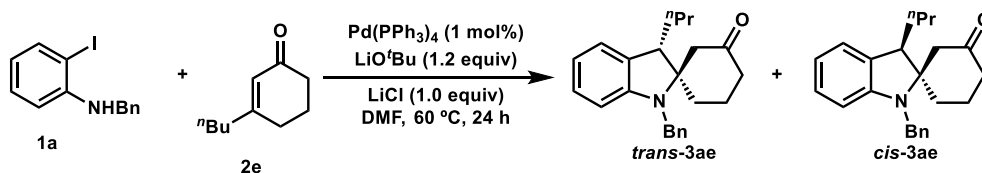

1'-Benzyl-3'-propylspiro[cyclohexane-1,2'-indolin]-3-one **3ae**: General procedure was followed. The reaction was performed with Pd(PPh<sub>3</sub>)<sub>4</sub> (2.6 mg, 0.002 mmol, 1 mol%), LiO<sup>t</sup>Bu (19.4 mg, 0.24 mmol, 1.2 equiv), LiCl (8.6 mg, 0.2 mmol, 1.0 equiv), **1a** (62.1 mg, 0.2 mmol, 1.0 equiv), and 3-butylcyclohex-2-en-1-one **2e** (61.7 mg, 0.4 mmol, 2.0 equiv) in DMF (2 mL) at 60 °C for 24 h. A mixture of diastereoisomers were obtained after purification by silica gel chromatography (PE / CH<sub>2</sub>Cl<sub>2</sub> = 2 / 1 with 0.5% EA). The stereochemistry was assigned by 2D-NOESY experiments.

The desired product *cis*-**3ae** (19.1 mg, 29%) and *trans*-**3ae** (21.9, 33%) was obtained. For *cis*-**3ae**: yellow liquid; R<sub>f</sub> = 0.5 (PE / DCM = 1 / 1); <sup>1</sup>H NMR (400 MHz, CDCl<sub>3</sub>) δ 7.37 – 7.28 (m, 4H), 7.28 – 7.18 (m, 1H), 7.08 (d, *J* = 7.6 Hz, 1H), 6.97 (td, *J* = 7.7, 1.3 Hz, 1H), 6.64 (td, *J* = 7.4, 1.0 Hz, 1H), 6.16 (dd, *J* = 7.8, 0.9 Hz, 1H), 4.45 (AB, *J* = 16.5 Hz, 1H), 4.11 (BA, *J* = 16.5 Hz, 1H), 2.94 – 2.80 (m, 2H), 2.56 (d, *J* = 13.9 Hz, 1H), 2.46 – 2.36 (m, 1H), 2.36 – 2.18 (m, 1H), 2.03 – 1.89 (m, 1H), 1.88 – 1.77 (m, 1H), 1.70 – 1.43 (m, 4H), 1.38 – 1.25 (m, 2H), 0.94 (t, *J* = 6.9 Hz, 3H); <sup>13</sup>C NMR (100 MHz, CDCl<sub>3</sub>) δ 210.1, 149.4, 139.5, 131.5, 128.8, 127.8, 127.1, 126.6, 125.4, 117.3, 107.2, 73.9, 47.4, 47.0, 46.8, 40.8, 32.2, 30.2, 20.5, 20.3, 14.3; HRMS (ESI+): calc'd for C<sub>23</sub>H<sub>28</sub>NO [M+H]<sup>+</sup>: 334.2165; found: 334.2155. For *trans*-**3ae**: colorless liquid; R<sub>f</sub> = 0.3 (PE / DCM = 1 / 1); <sup>1</sup>H NMR (400 MHz, CDCl<sub>3</sub>) δ 7.34 – 7.22 (m, 4H), 7.22 – 7.12 (m, 1H), 7.01 (dd, *J* = 7.2, 1.3 Hz, 1H), 6.89 (td, *J* = 7.7, 1.4 Hz, 1H), 6.57 (td, *J* = 7.4, 1.0 Hz, 1H), 6.10 (d, *J* = 8.0 Hz, 1H), 4.36 (AB, *J* = 16.3 Hz, 1H), 3.90 (BA, *J* = 16.3 Hz, 1H), 2.59 (dd, *J* = 10.9, 2.9 Hz, 1H), 2.45 – 2.22 (m, 4H), 2.21 – 2.11 (m, 1H), 2.10 – 1.971 (m, 1H), 1.89 (td, *J* = 13.6, 4.0 Hz, 1H), 1.71 – 1.53 (m, 1H), 1.53 – 1.31 (m, 3H), 1.30 – 1.12 (m, 1H), 0.84 (t, *J* = 6.8 Hz, 3H); <sup>13</sup>C NMR (100 MHz, CDCl<sub>3</sub>) δ 210.1, 149.7, 139.8, 131.6, 128.8, 127.8, 127.1, 126.7, 125.9, 117.7, 107.5, 74.1, 47.4, 47.2, 46.7, 41.3, 30.7, 29.2, 21.6, 20.0, 14.3; HRMS (ESI+): calc'd for C<sub>23</sub>H<sub>28</sub>NO [M+H]<sup>+</sup>: 334.2165; found: 334.2161.

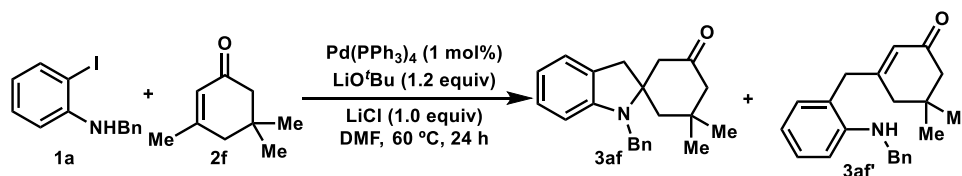

1'-Benzyl-3,3-dimethylspiro[cyclohexane-1,2'-indolin]-5-one **3af** and 3-(2-(benzylamino)benzyl)-5,5-dimethylcyclohex-2-en-1-one **3af'**: General procedure was followed. The reaction was performed with Pd(PPh<sub>3</sub>)<sub>4</sub> (2.4 mg, 0.002 mmol, 1 mol%), LiO<sup>t</sup>Bu (19.4 mg, 0.24 mmol, 1.2 equiv), LiCl (8.7 mg, 0.2 mmol, 1.0 equiv), **1a** (61.8 mg, 0.2 mmol, 1.0 equiv), and isophorone **2f** (56.3 mg, 0.4 mmol, 2.0 equiv) in DMF (2

mL) at 60 °C for 24 h. The desired products **3af** (29.1 mg, 46%) and **3af'** (26.5 mg, 42%) were obtained after purification by silica gel chromatography (PE / CH<sub>2</sub>Cl<sub>2</sub> = 2 / 1 with 0.5% EA). For **3af**: white solid; *R<sub>f</sub>* = 0.5 (PE / EA = 5 / 1); mp: 158 – 160 °C; <sup>1</sup>H NMR (400 MHz, CDCl<sub>3</sub>) δ 7.44 – 7.31 (m, 4H), 7.27 (t, *J* = 7.0 Hz, 1H), 7.06 (d, *J* = 7.1 Hz, 1H), 6.93 (t, *J* = 7.6 Hz, 1H), 6.64 (t, *J* = 7.3 Hz, 1H), 6.08 (d, *J* = 7.8 Hz, 1H), 4.49 (AB, *J* = 16.4 Hz, 1H), 4.08 (BA, *J* = 16.4 Hz, 1H), 3.03 (s, 2H), 2.55 – 2.40 (m, 2H), 2.34 (d, *J* = 12.8 Hz, 1H), 2.21 – 2.11 (m, 2H), 1.97 (d, *J* = 13.9 Hz, 1H), 1.15 (s, 3H), 1.10 (s, 3H); <sup>13</sup>C NMR (100 MHz, CDCl<sub>3</sub>) δ 209.7, 149.7, 139.2, 128.8, 127.7, 127.2, 127.1, 126.5, 124.6, 117.7, 106.9, 71.6, 54.4, 47.9, 47.3, 46.8, 42.3, 33.9, 33.8, 27.5; HRMS (ESI<sup>+</sup>): calc'd for C<sub>22</sub>H<sub>25</sub>NNaO [M+Na]<sup>+</sup>: 342.1828; found: 342.1828. For **3af'**: colorless liquid; *R<sub>f</sub>* = 0.3 (PE / EA = 5 / 1); <sup>1</sup>H NMR (400 MHz, C<sub>6</sub>D<sub>6</sub>) δ 7.18 (d, *J* = 4.4 Hz, 4H), 7.14 – 7.04 (m, 2H), 6.88 (dd, *J* = 7.4, 1.5 Hz, 1H), 6.74 (td, *J* = 7.4, 1.1 Hz, 1H), 6.57 (d, *J* = 7.5 Hz, 1H), 5.94 (t, *J* = 1.4 Hz, 1H), 3.98 (s, 2H), 3.68 (br, 1H), 2.96 (s, 2H), 2.01 (s, 2H), 1.62 (s, 2H), 0.63 (s, 6H); <sup>13</sup>C NMR (100 MHz, C<sub>6</sub>D<sub>6</sub>) δ 197.6, 159.5, 146.6, 139.6, 131.1, 129.0, 128.8, 127.7, 127.6, 126.3, 121.2, 117.9, 111.6, 51.2, 48.3, 43.0, 40.9, 33.2, 28.0; HRMS (ESI<sup>+</sup>): calc'd for C<sub>22</sub>H<sub>25</sub>NNaO [M+Na]<sup>+</sup>: 342.1828; found: 342.1833.

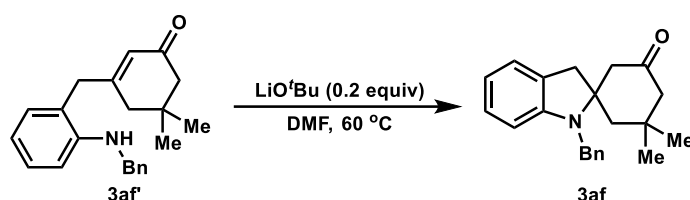

**Procedure:** In an argon-filled glovebox, to a screw capped vial equipped with a magnetic stirring bar were LiO'Bu (1.2 equiv), intermediate **3af'** (0.1 mmol), and DMF (1 mL). After the vial was sealed, the contents were stirred at 60 °C for 24 h. The vial was removed from the glovebox, diluted with EA (10 mL) and water (10 mL). The aqueous phase was extracted with EA (10 mL × 3) and the combined organic layers were washed with H<sub>2</sub>O (10 mL × 3) and brine, then dried over anhydrous Na<sub>2</sub>SO<sub>4</sub>. EA (1 mL) solution of 1,3,5-trimethoxybenzene (5.6 mg / mL) was added, and the solvents were removed under reduced pressure. Yield of **3af** was determined as 24% by <sup>1</sup>H NMR using 1,3,5-trimethoxybenzene as an internal standard.

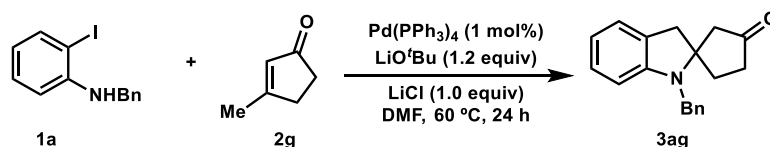

**1'-Benzylspiro[cyclopentane-1,2'-indolin]-3-one 3ag:** General procedure was followed. The reaction was performed with Pd(PPh<sub>3</sub>)<sub>4</sub> (3.0 mg, 0.002 mmol, 1 mol%), LiO'Bu (19.7 mg, 0.24 mmol, 1.2 equiv), LiCl (8.5 mg, 0.2 mmol, 1.0 equiv), **1a** (61.6 mg, 0.2 mmol, 1.0 equiv), and 3-methylcyclopent-2-en-1-one **2g** (38.6 mg, 0.4 mmol, 2.0 equiv) in DMF (2 mL) at 60 °C for 24 h. The desired product **3ag** (10.7 mg, 19%) was obtained as a colorless liquid after purification by silica gel chromatography (PE / CH<sub>2</sub>Cl<sub>2</sub> = 2 / 1 with 0.5% EA). *R<sub>f</sub>* = 0.3 (PE / EA = 10 / 1); <sup>1</sup>H NMR (400 MHz, CDCl<sub>3</sub>) δ 7.39 – 7.29 (m, 5H), 7.09 (dd, *J* = 7.2, 0.7 Hz, 1H), 6.97 (t, *J* = 7.7 Hz, 1H), 6.65 (t, *J* = 7.4 Hz, 1H), 6.17



(d,  $J = 7.8$  Hz, 1H), 4.33 (AB,  $J = 16.6$  Hz, 1H), 4.27 (BA,  $J = 16.6$  Hz, 1H), 3.16 (AB,  $J = 15.2$  Hz, 1H), 3.06 (BA,  $J = 15.2$  Hz, 1H), 2.52 – 2.34 (m, 4H), 2.33 – 2.10 (m, 2H);  $^{13}\text{C}$  NMR (100 MHz,  $\text{CDCl}_3$ )  $\delta$  216.2, 151.2, 139.1, 128.8, 127.9, 127.2, 126.6, 126.3, 124.5, 117.7, 106.7, 72.2, 47.1, 47.0, 43.0, 37.5, 32.5. HRMS (ESI<sup>+</sup>): calc'd for  $\text{C}_{19}\text{H}_{20}\text{NO}$   $[\text{M}+\text{H}]^+$ : 278.1539; found: 278.1537.

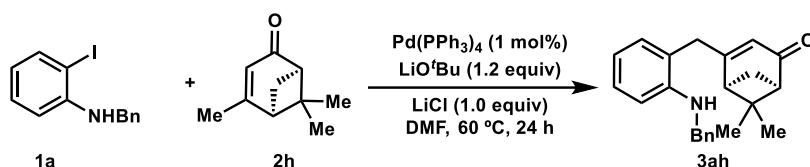

**(1R,5S)-4-(2-(Benzylamino)benzyl)-6,6-dimethylbicyclo[3.1.1]hept-3-en-2-one 3ah:**

General procedure was followed. The reaction was performed with  $\text{Pd}(\text{PPh}_3)_4$  (3.2 mg, 0.002 mmol, 1 mol%),  $\text{LiO}^t\text{Bu}$  (20.4 mg, 0.24 mmol, 1.2 equiv),  $\text{LiCl}$  (9.2 mg, 0.2 mmol, 1.0 equiv), **1a** (61.8 mg, 0.2 mmol, 1.0 equiv), and cyclohexenone **2h** (61.2 mg, 0.4 mmol, 2.0 equiv) in DMF (2 mL) at 60 °C for 24 h. The desired product **3ah** (19.2 mg, 29%) was obtained as a colorless liquid after purification by silica gel chromatography (PE /  $\text{CH}_2\text{Cl}_2 = 2 / 1$  with 0.5% EA).  $R_f = 0.3$  (PE / EA = 5 / 1);  $^1\text{H}$  NMR (400 MHz,  $\text{CDCl}_3$ )  $\delta$  7.37 – 7.27 (m, 5H), 7.17 (td,  $J = 8.0$ , 1.6 Hz, 1H), 7.01 (dd,  $J = 7.4$ , 1.5 Hz, 1H), 6.73 (td,  $J = 7.4$ , 0.9 Hz, 1H), 6.67 (d,  $J = 8.1$  Hz, 1H), 5.61 (t,  $J = 1.6$  Hz, 1H), 4.30 (s, 2H), 3.80 (br s, 1H), 3.49 (s, 2H), 2.78 (dt,  $J = 9.2$ , 5.5 Hz, 1H), 2.65 (td,  $J = 5.9$ , 1.7 Hz, 1H), 2.49 (t,  $J = 6.5$  Hz, 1H), 2.02 (d,  $J = 9.2$  Hz, 1H), 1.44 (s, 3H), 0.88 (s, 3H);  $^{13}\text{C}$  NMR (100 MHz,  $\text{CDCl}_3$ )  $\delta$  203.8, 170.6, 146.3, 139.0, 131.1, 128.8, 128.7, 127.7, 127.5, 121.2, 120.2, 117.7, 111.3, 58.0, 54.1, 48.5, 48.2, 41.1, 39.9, 26.6, 22.1; HRMS (ESI<sup>+</sup>): calc'd for  $\text{C}_{23}\text{H}_{26}\text{NO}$   $[\text{M}+\text{H}]^+$ : 332.2009; found: 332.2008.

**General Procedure and Spectroscopic Data for Pd-Catalyzed Cascade  $\alpha'$ -Arylation/Aza-Michael Addition Reaction to Construct Azabicyclo[3.2.2]nonanones**

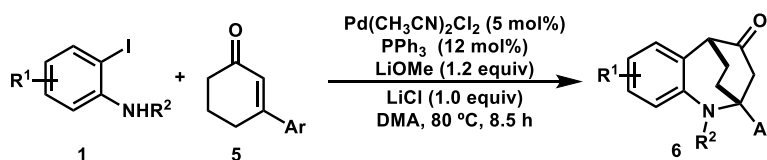

**General procedure:** In an argon-filled glove box,  $\text{Pd}(\text{CH}_3\text{CN})_2\text{Cl}_2$  (0.01 mmol, 5 mol%),  $\text{PPh}_3$  (0.024 mmol, 12 mol%),  $\text{LiOMe}$  (0.24 mmol, 1.2 equiv),  $\text{LiCl}$  (0.2 mmol, 1.0 equiv), **1** (0.4 mmol, 2.0 equiv), 3-arylcyclohex-2-en-1-one **5** (0.2 mmol, 1.0 equiv), and DMA (2 mL) were added to a screw-capped vial equipped with a magnetic stirring bar. The vial was sealed and stirred at 80 °C for 8.5 h. After removed from the glove box, the mixture was diluted with water (10 mL), and extracted with EA (10 mL  $\times$  3). Then the combined organic layers were washed with  $\text{H}_2\text{O}$  (10 mL  $\times$  3) and brine, and then dried over

anhydrous Na<sub>2</sub>SO<sub>4</sub>. The solvents were removed under reduced pressure and the crude mixture was purified by silica gel chromatography to provide the desired product.

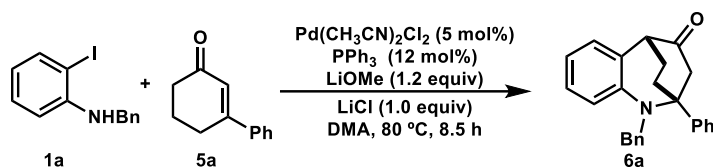

**1-Benzyl-2-phenyl-2,3,4,5-tetrahydro-1H-2,5-ethanobenzo[b]azepin-10-one 6a:** General procedure was followed. The reaction was performed with Pd(CH<sub>3</sub>CN)<sub>2</sub>Cl<sub>2</sub> (3.2 mg, 0.01 mmol, 5 mol%), PPh<sub>3</sub> (6.3 mg, 0.024 mmol, 12 mol%), LiOMe (9.5 mg, 0.24 mmol, 1.2 equiv), LiCl (9.0 mg, 0.2 mmol, 1.0 equiv), **1a** (123.1 mg, 0.4 mmol, 2.0 equiv), 3-phenylcyclohex-2-en-1-one **5a** (33.9 mg, 0.2 mmol, 1.0 equiv), and DMA (2 mL) at 80 °C for 8.5 h. The desired product **6a** (56.6 mg, 81%) was obtained as a yellow solid after purification by silica gel chromatography (PE / CH<sub>2</sub>Cl<sub>2</sub> = 2 / 1 with 0.5% EA). R<sub>f</sub> = 0.5 (PE / EA = 5 / 1); mp: 178 – 180 °C; <sup>1</sup>H NMR (400 MHz, acetone-*d*<sub>6</sub>) δ 7.50 – 7.42 (m, 2H), 7.35 (t, *J* = 7.4 Hz, 2H), 7.30 (d, *J* = 7.1 Hz, 1H), 7.28 – 7.24 (m, 4H), 7.20 (d, *J* = 7.3 Hz, 2H), 6.98 (t, *J* = 7.7 Hz, 1H), 6.73 (t, *J* = 7.4 Hz, 1H), 6.13 (d, *J* = 7.8 Hz, 1H), 4.03 (AB, *J* = 16.4 Hz, 1H), 3.96 (BA, *J* = 16.3 Hz, 1H), 3.67 (s, 1H), 3.29 (AB, *J* = 15.1 Hz, 1H), 2.94 (BA, *J* = 15.1 Hz, 1H), 2.39 – 2.19 (m, 4H); <sup>13</sup>C NMR (100 MHz, acetone-*d*<sub>6</sub>) δ 210.0, 152.7, 145.8, 139.9, 131.7, 129.5, 129.2, 129.0, 128.5, 127.64, 127.55, 126.7, 124.4, 119.2, 108.4, 75.6, 51.1, 50.1, 45.0, 36.4, 26.3; HRMS (ESI<sup>+</sup>): calc'd for C<sub>25</sub>H<sub>24</sub>NO [M+H]<sup>+</sup>: 354.1852; found: 354.1849.

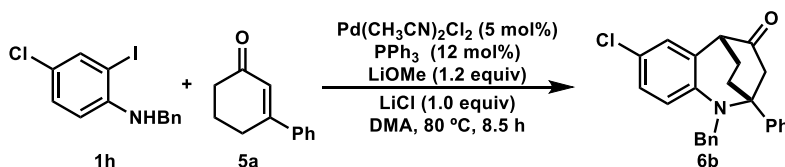

**1-Benzyl-7-chloro-2-phenyl-2,3,4,5-tetrahydro-1H-2,5-ethanobenzo[b]azepin-10-one 6b:** General procedure was followed. The reaction was performed with Pd(CH<sub>3</sub>CN)<sub>2</sub>Cl<sub>2</sub> (2.6 mg, 0.01 mmol, 5 mol%), PPh<sub>3</sub> (6.6 mg, 0.024 mmol, 12 mol%), LiOMe (10.1 mg, 0.24 mmol, 1.2 equiv), LiCl (9.2 mg, 0.2 mmol, 1.0 equiv), **1h** (135.2 mg, 0.4 mmol, 2.0 equiv), 3-phenylcyclohex-2-en-1-one **5a** (33.6 mg, 0.2 mmol, 1.0 equiv), and DMA (2 mL) at 80 °C for 8.5 h. The desired product **6b** (37.2 mg, 49%) was obtained as a yellow solid after purification by silica gel chromatography (PE / CH<sub>2</sub>Cl<sub>2</sub> = 2 / 1 with 0.5% EA). R<sub>f</sub> = 0.6 (PE / EA = 5 / 1); mp: 162 – 163 °C; <sup>1</sup>H NMR (400 MHz, acetone-*d*<sub>6</sub>) δ 7.45 (d, *J* = 7.4 Hz, 2H), 7.38 (t, *J* = 7.4 Hz, 2H), 7.34 – 7.18 (m, 7H), 6.99 (dd, *J* = 8.3, 2.1 Hz, 1H), 6.09 (d, *J* = 8.3 Hz, 1H), 4.05 (AB, *J* = 16.4 Hz, 1H), 3.97 (BA, *J* = 16.4 Hz, 1H), 3.71 (s, 1H), 3.32 (d, *J* = 15.2 Hz, 1H), 2.98 (BA, *J* = 15.2 Hz, 1H), 2.40 – 2.21 (m, 4H); <sup>13</sup>C NMR (100 MHz, acetone-*d*<sub>6</sub>) δ 209.8, 151.6, 145.5, 139.5, 134.3, 129.7, 129.4, 128.7, 127.80, 127.75, 126.7, 124.9, 123.3, 109.2, 76.0, 51.0, 50.1, 45.0, 36.4, 26.3; HRMS (ESI<sup>+</sup>): calc'd for C<sub>25</sub>H<sub>23</sub>ClNO [M+H]<sup>+</sup>: 388.1463; found: 388.1451.

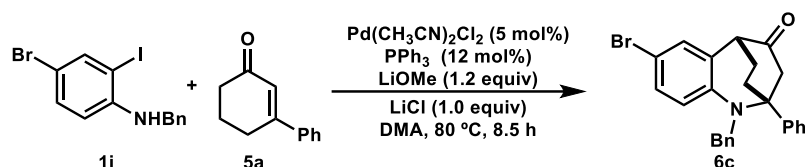

**1-Benzyl-7-bromo-2-phenyl-2,3,4,5-tetrahydro-1H-2,5-ethanobenzo[b]azepin-10-**

**one 6c:** General procedure was followed. The reaction was performed with Pd(CH<sub>3</sub>CN)<sub>2</sub>Cl<sub>2</sub> (3.0 mg, 0.01 mmol, 5 mol%), PPh<sub>3</sub> (7.2 mg, 0.024 mmol, 12 mol%), LiOMe (9.7 mg, 0.24 mmol, 1.2 equiv), LiCl (8.7 mg, 0.2 mmol, 1.0 equiv), **1i** (168.1 mg, 0.4 mmol, 2.0 equiv), 3-phenylcyclohex-2-en-1-one **5a** (33.3 mg, 0.2 mmol, 1.0 equiv), and DMA (2 mL) at 80 °C for 8.5 h. The desired product **6c** (40.8 mg, 49%) was obtained as a yellow solid after purification by silica gel chromatography (PE / CH<sub>2</sub>Cl<sub>2</sub> = 2 / 1 with 0.5% EA). R<sub>f</sub> = 0.6 (PE / EA = 5 / 1); mp: 165 – 166 °C; <sup>1</sup>H NMR (400 MHz, acetone-*d*<sub>6</sub>) δ 7.48 – 7.42 (m, 2H), 7.41 – 7.18 (m, 9H), 7.12 (dd, *J* = 8.3, 1.6 Hz, 1H), 6.05 (d, *J* = 8.3 Hz, 1H), 4.05 (AB, *J* = 16.4 Hz, 1H), 3.97 (BA, *J* = 16.4 Hz, 1H), 3.72 (s, 1H), 3.32 (AB, *J* = 15.2 Hz, 1H), 2.98 (BA, *J* = 15.2 Hz, 1H), 2.40 – 2.24 (m, 4H); <sup>13</sup>C NMR (100 MHz, acetone-*d*<sub>6</sub>) δ 209.7, 151.9, 145.4, 139.3, 134.7, 131.6, 129.6, 129.3, 128.6, 127.7, 127.62, 127.55, 126.6, 110.1, 109.7, 75.8, 50.9, 49.9, 44.9, 36.3, 26.2; HRMS (ESI<sup>+</sup>): calc'd for C<sub>25</sub>H<sub>22</sub>BrNNaO [M+Na]<sup>+</sup>: 454.0777; found: 454.0778.

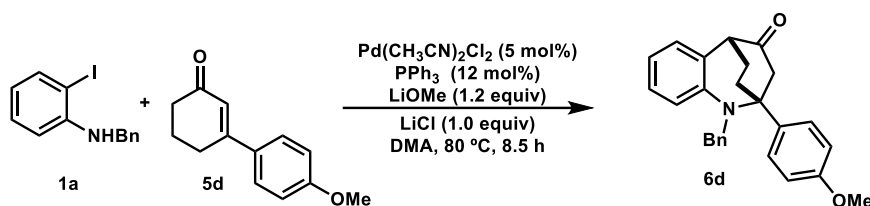

**1-Benzyl-2-(4-methoxyphenyl)-2,3,4,5-tetrahydro-1H-2,5-ethanobenzo[b]azepin-**

**10-one 6d:** General procedure was followed. The reaction was performed with Pd(CH<sub>3</sub>CN)<sub>2</sub>Cl<sub>2</sub> (3.0 mg, 0.01 mmol, 5 mol%), PPh<sub>3</sub> (6.5 mg, 0.024 mmol, 12 mol%), LiOMe (9.6 mg, 0.24 mmol, 1.2 equiv), LiCl (8.8 mg, 0.2 mmol, 1.0 equiv), **1a** (124.0 mg, 0.4 mmol, 2.0 equiv), 4'-methoxy-5,6-dihydro-[1,1'-biphenyl]-3(4H)-one **5d** (40.0 mg, 0.2 mmol, 1.0 equiv), and DMA (2 mL) at 80 °C for 8.5 h. The desired product **6d** (67.8 mg, 89%) was obtained as a yellow solid after purification by silica gel chromatography (PE / CH<sub>2</sub>Cl<sub>2</sub> = 2 / 1 with 0.5% EA). R<sub>f</sub> = 0.4 (PE / EA = 5 / 1); mp: 58 – 60 °C; <sup>1</sup>H NMR (400 MHz, acetone-*d*<sub>6</sub>) δ 7.43 – 7.37 (m, 2H), 7.30 – 7.24 (m, 4H), 7.24 – 7.17 (m, 2H), 6.97 (t, *J* = 7.7 Hz, 1H), 6.93 – 6.87 (m, 2H), 6.73 (t, *J* = 7.2 Hz, 1H), 6.12 (d, *J* = 7.8 Hz, 1H), 4.00 (AB, *J* = 16.2 Hz, 1H), 3.93 (BA, *J* = 16.3 Hz, 1H), 3.78 (s, 3H), 3.65 (s, 1H), 3.21 (AB, *J* = 15.0 Hz, 1H), 2.90 (BA, *J* = 15.0 Hz, 1H), 2.38 – 2.19 (m, 4H); <sup>13</sup>C NMR (100 MHz, acetone-*d*<sub>6</sub>) δ 210.0, 160.0, 152.6, 140.0, 137.5, 131.8, 129.2, 128.9, 128.0, 127.6, 127.5, 124.3, 119.1, 114.7, 108.6, 75.6, 55.5, 51.0, 50.0, 45.1, 36.4, 26.0; HRMS (ESI<sup>+</sup>): calc'd for C<sub>26</sub>H<sub>26</sub>NO<sub>2</sub> [M+H]<sup>+</sup>: 384.1958; found: 384.1945.

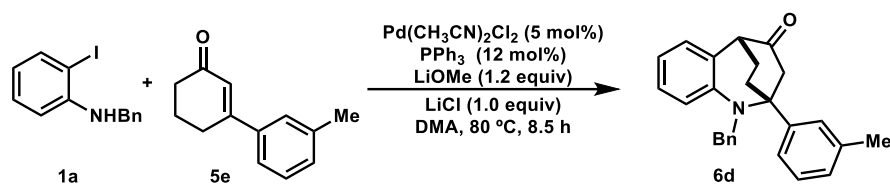

**1-Benzyl-2-(m-tolyl)-2,3,4,5-tetrahydro-1H-2,5-ethanobenzo[b]azepin-10-one 6e:**  
 General procedure was followed. The reaction was performed with Pd(CH<sub>3</sub>CN)<sub>2</sub>Cl<sub>2</sub> (3.2 mg, 0.01 mmol, 5 mol%), PPh<sub>3</sub> (7.5 mg, 0.024 mmol, 12 mol%), LiOMe (9.6 mg, 0.24 mmol, 1.2 equiv), LiCl (9.4 mg, 0.2 mmol, 1.0 equiv), **1a** (126.2 mg, 0.4 mmol, 2.0 equiv), 3'-methyl-5,6-dihydro-[1,1'-biphenyl]-3(4*H*)-one **5e** (37.0 mg, 0.2 mmol, 1.0 equiv), and DMA (2 mL) at 80 °C for 8.5 h. The desired product **6e** (57.3 mg, 79%) was obtained as a yellow solid after purification by silica gel chromatography (PE / CH<sub>2</sub>Cl<sub>2</sub> = 2 / 1 with 0.5% EA). *R<sub>f</sub>* = 0.5 (PE / EA = 5 / 1); mp: 45 – 46 °C; <sup>1</sup>H NMR (400 MHz, acetone-*d*<sub>6</sub>) δ 7.33 (s, 1H), 7.31 – 7.24 (m, 4H), 7.24 – 7.17 (m, 4H), 7.14 – 7.08 (m, 1H), 6.98 (t, *J* = 7.7 Hz, 1H), 6.73 (dd, *J* = 10.9, 3.9 Hz, 1H), 6.13 (d, *J* = 7.8 Hz, 1H), 4.02 (AB, *J* = 16.3 Hz, 1H), 3.96 (BA, *J* = 16.3 Hz, 1H), 3.67 (s, 1H), 3.26 (AB, *J* = 15.1 Hz, 1H), 2.91 (BA, *J* = 15.1 Hz, 1H), 2.32 – 2.21 (m, 7H); <sup>13</sup>C NMR (100 MHz, acetone-*d*<sub>6</sub>) δ 210.1, 152.8, 145.9, 140.1, 139.0, 131.8, 129.5, 129.3, 129.2, 129.0, 127.8, 127.6, 127.5, 124.5, 124.0, 119.2, 108.5, 75.8, 51.1, 50.2, 45.1, 36.5, 26.2, 21.8; HRMS (ESI<sup>+</sup>): calc'd for C<sub>26</sub>H<sub>26</sub>NO [M+H]<sup>+</sup>: 368.2009; found: 368.1999.

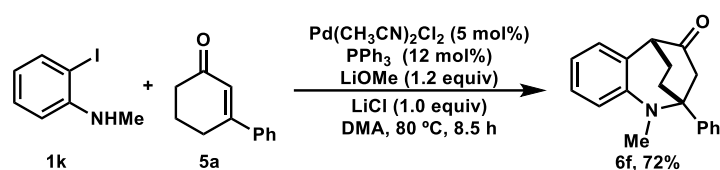

**1-Methyl-2-phenyl-2,3,4,5-tetrahydro-1H-2,5-ethanobenzo[b]azepin-10-one 6f:**  
 General procedure was followed. The reaction was performed with Pd(CH<sub>3</sub>CN)<sub>2</sub>Cl<sub>2</sub> (2.9 mg, 0.01 mmol, 5 mol%), PPh<sub>3</sub> (7.3 mg, 0.024 mmol, 12 mol%), LiOMe (9.8 mg, 0.24 mmol, 1.2 equiv), LiCl (8.2 mg, 0.2 mmol, 1.0 equiv), **1k** (95.3 mg, 0.4 mmol, 2.0 equiv), 5,6-dihydro-[1,1'-biphenyl]-3(4*H*)-one **5a** (34.4 mg, 0.2 mmol, 1.0 equiv), and DMA (2 mL) at 80 °C for 8.5 h. The desired product **6f** (39.7 mg, 72%) was obtained as a yellow liquid after purification by silica gel chromatography (PE / CH<sub>2</sub>Cl<sub>2</sub> = 2 / 1 with 0.5% EA). *R<sub>f</sub>* = 0.5 (PE / EA = 5 / 1); <sup>1</sup>H NMR (400 MHz, acetone-*d*<sub>6</sub>) δ 7.39 – 7.31 (m, 4H), 7.30 – 7.25 (m, 1H), 7.16 – 7.09 (m, 2H), 6.67 (t, *J* = 7.7 Hz, 1H), 6.45 (d, *J* = 8.0 Hz, 1H), 3.49 (d, *J* = 4.2 Hz, 1H), 3.31 (AB, *J* = 14.8 Hz, 1H), 2.81 (BA, *J* = 14.8 Hz, 1H), 2.52 (s, 3H), 2.42 – 2.27 (m, 1H), 2.23 – 2.08 (m, 3H); <sup>13</sup>C NMR (100 MHz, acetone-*d*<sub>6</sub>) δ 209.9, 153.0, 145.8, 130.9, 129.6, 129.4, 128.3, 126.5, 124.5, 118.4, 106.2, 74.6, 50.9, 44.2, 35.7, 28.9, 26.5; HRMS (ESI<sup>+</sup>): calc'd for C<sub>19</sub>H<sub>20</sub>NO [M+H]<sup>+</sup>: 278.1539; found: 278.1550.

## Gram Scale Synthesis of 3aa

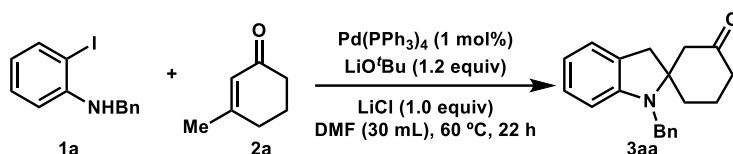

**1'-Benzylspiro[cyclohexane-1,2'-indolin]-3-one 3aa:** In an argon-filled glove box, Pd(PPh<sub>3</sub>)<sub>4</sub> (75.2 mg, 0.06 mmol, 1 mol%), LiO<sup>t</sup>Bu (572.0 mg, 7.2 mmol, 1.2 equiv), LiCl (253.2 mg, 6 mmol, 1 equiv), **1a** (1.83 g, 6 mmol, 1 equiv), 3-methylcyclohex-2-en-1-one **2a** (1.34 mL, 12 mmol, 2 equiv), and DMF (30 mL) were added to a Schlenk flask equipped with a magnetic stirring bar. The vial was sealed and stirred at 60 °C for 24 h. After removed from the glove box, the mixture was diluted with water (100 mL), and extracted with EA (50 mL × 3). Then the combined organic layers were washed with H<sub>2</sub>O (50 mL × 3) and brine, and then dried over anhydrous Na<sub>2</sub>SO<sub>4</sub>. The desired product **3aa** (1.43 g, 82%) was obtained as a white solid after purification by silica gel chromatography (PE / CH<sub>2</sub>Cl<sub>2</sub> = 2 / 1 with 0.5% EA).

## Preparation and Characterization of Substrates

2-Haloaniline derivatives (**1a**<sup>1</sup>, **1c**<sup>1</sup>, **1d**<sup>1</sup>, **1f**<sup>1</sup>, **1g**<sup>1</sup>, **1h**<sup>1</sup>, **1i**<sup>1</sup>, and **1k**<sup>2</sup>) and cyclic enones (**2b**<sup>3</sup>, **2c**<sup>4</sup>, **2d**<sup>4, 5</sup>, **5d**<sup>6</sup>, and **5e**<sup>6</sup>) were prepared following the reported procedures and the spectroscopic data were found consistent with those reported in the literature.

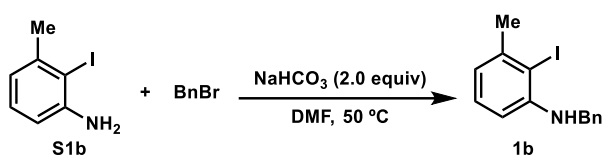

**N-Benzyl-2-iodo-3-methylaniline 1b:** The reported procedure was followed.<sup>1</sup> To a dried two neck round-bottom flask, 2-iodo-3-methylaniline **S1b** (1.11 g, 4.78 mmol, 1 equiv), and NaHCO<sub>3</sub> (0.82 g, 9.56 mmol, 2 equiv) were added, followed by the addition of DMF (10 mL) and BnBr (0.57 mL, 4.78 mmol, 1 equiv). The mixture was stirred at 50 °C overnight. Then the reaction was quenched by sat. NH<sub>4</sub>Cl aq. (10 mL), diluted with water (20 mL), and extracted with EA (20 mL × 3). The combined organic layers were washed with H<sub>2</sub>O (10 mL × 3) and brine, and then dried over anhydrous Na<sub>2</sub>SO<sub>4</sub>. The desired product **1b** (0.67 g, 42%) was obtained as a colorless liquid after purification by silica gel chromatography (PE / EA = 200 / 1). R<sub>f</sub> = 0.5 (PE / EA = 200 / 1); <sup>1</sup>H NMR (400 MHz, CDCl<sub>3</sub>) δ 7.42 – 7.32 (m, 4H), 7.32 – 7.27 (m, 1H), 7.05 (t, *J* = 7.7 Hz, 1H), 6.67 (d, *J* = 6.8 Hz, 1H), 6.40 (d, *J* = 8.0 Hz, 1H), 4.42 (s, 2H), 2.45 (s, 3H); <sup>13</sup>C NMR (100 MHz, CDCl<sub>3</sub>) δ 147.0, 142.5, 138.6, 128.83, 128.82, 127.47, 127.46, 119.4, 108.9, 93.0, 49.0,

29.8; HRMS (ESI+): calc'd for C<sub>14</sub>H<sub>15</sub>IN [M+H]<sup>+</sup>: 324.0244; found: 324.0242.

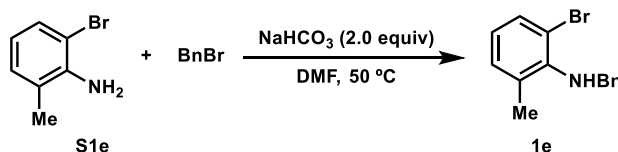

**N-Benzyl-2-bromo-6-methylaniline 1e:** The reported procedure was followed.<sup>1</sup> To a dried two neck round-bottom flask, 2-bromo-6-methylaniline **S1e** (0.18 mL, 1.3 mmol, 1.3 equiv), and NaHCO<sub>3</sub> (0.17 mg, 2 mmol, 2 equiv) were added, followed by the addition of DMF (2.5 mL) and BnBr (0.19 g, 1 mmol, 1 equiv). The mixture was stirred at 50 °C overnight. Then the reaction was quenched by sat. NH<sub>4</sub>Cl aq. (10 mL), diluted with water (20 mL), and extracted with EA (20 mL × 3). The combined organic layers were washed with H<sub>2</sub>O (10 mL × 3) and brine, and then dried over anhydrous Na<sub>2</sub>SO<sub>4</sub>. The desired product **1e** (0.23 g, 84%) was obtained as a colorless liquid after purification by silica gel chromatography (PE / EA = 200 / 1). R<sub>f</sub> = 0.5 (PE / EA = 200 / 1); <sup>1</sup>H NMR (400 MHz, CDCl<sub>3</sub>) δ 7.42 (d, *J* = 7.6 Hz, 2H), 7.40 – 7.27 (m, 4H), 7.13 – 7.07 (m, 1H), 6.79 (t, *J* = 7.7 Hz, 1H), 4.21 (s, 2H), 2.40 (s, 3H); <sup>13</sup>C NMR (100 MHz, CDCl<sub>3</sub>) δ 145.0, 139.6, 132.2, 130.8, 130.6, 128.7, 128.2, 127.6, 123.5, 118.4, 52.6, 19.6; HRMS (ESI+): calc'd for C<sub>14</sub>H<sub>15</sub>NBr [M+H]<sup>+</sup>: 276.0382; found: 276.0385.

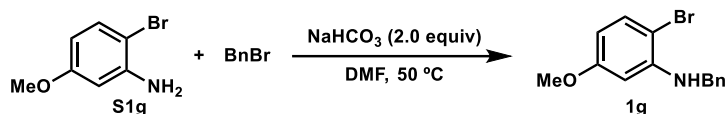

**N-Benzyl-2-bromo-5-methoxyaniline 1g:** The reported procedure was followed.<sup>1</sup> To a dried two neck bottom flask, 2-bromo-5-methoxyaniline **S1g** (1.38 g, 6.5 mmol, 1.3 equiv), and NaHCO<sub>3</sub> (0.84 g, 10 mmol, 2 equiv) was added, followed by the addition of DMF (10 mL) and BnBr (0.57 mL, 5 mmol, 1 equiv). The mixture was stirred at 50 °C overnight. Then the reaction was quenched by sat. NH<sub>4</sub>Cl aq. (10 mL), diluted with water (20 mL), and extracted with EA (20 mL × 3). The combined organic layers were washed with H<sub>2</sub>O (10 mL × 3) and brine, and then dried over anhydrous Na<sub>2</sub>SO<sub>4</sub>. The desired product **1g** (1.29 g, 90%) was obtained as a colorless liquid after purification by silica gel chromatography (PE / EA = 100 / 1). R<sub>f</sub> = 0.5 (PE / EA = 100 / 1); <sup>1</sup>H NMR (400 MHz, CDCl<sub>3</sub>) δ 7.41 – 7.27 (m, 6H), 6.24 – 6.16 (m, 2H), 4.39 (s, 2H), 3.72 (s, 3H); <sup>13</sup>C NMR (100 MHz, CDCl<sub>3</sub>) δ 160.3, 145.4, 138.4, 132.6, 128.9, 127.6, 127.5, 103.3, 101.2, 98.9, 55.4, 48.3; HRMS (ESI+): calc'd for C<sub>14</sub>H<sub>15</sub>NOBr [M+H]<sup>+</sup>: 292.0332; found: 292.0331.

## X-Ray Crystallographic Data of 3aa and 3ac

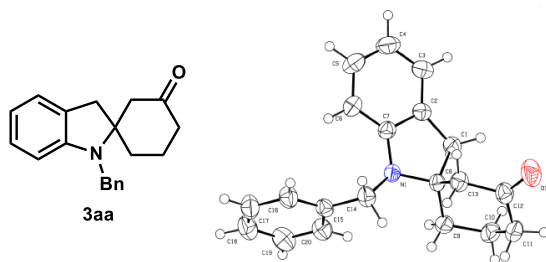

**Table S9. Crystal data and structure refinement for 3aa.**

|                                   |                                             |                   |
|-----------------------------------|---------------------------------------------|-------------------|
| Identification code               | CCDC 1905674                                |                   |
| Empirical formula                 | C <sub>20</sub> H <sub>21</sub> NO          |                   |
| Formula weight                    | 291.38                                      |                   |
| Temperature                       | 296(2) K                                    |                   |
| Wavelength                        | 0.71073 Å                                   |                   |
| Crystal system                    | Monoclinic                                  |                   |
| Space group                       | P2 <sub>1</sub> /c                          |                   |
| Unit cell dimensions              | a = 10.162(15) Å                            | a = 90°.          |
|                                   | b = 19.10(3) Å                              | b = 109.780(18)°. |
|                                   | c = 8.941(13) Å                             | g = 90°.          |
| Volume                            | 1633(4) Å <sup>3</sup>                      |                   |
| Z                                 | 4                                           |                   |
| Density (calculated)              | 1.185 Mg/m <sup>3</sup>                     |                   |
| Absorption coefficient            | 0.072 mm <sup>-1</sup>                      |                   |
| F(000)                            | 624                                         |                   |
| Crystal size                      | 0.080 x 0.060 x 0.040 mm <sup>3</sup>       |                   |
| Theta range for data collection   | 4.265 to 29.342°.                           |                   |
| Index ranges                      | -11 ≤ h ≤ 13, -22 ≤ k ≤ 26, -11 ≤ l ≤ 12    |                   |
| Reflections collected             | 11359                                       |                   |
| Independent reflections           | 4432 [R(int) = 0.0185]                      |                   |
| Completeness to theta = 25.242°   | 99.1 %                                      |                   |
| Absorption correction             | Semi-empirical from equivalents             |                   |
| Max. and min. transmission        | 0.7459 and 0.6455                           |                   |
| Refinement method                 | Full-matrix least-squares on F <sup>2</sup> |                   |
| Data / restraints / parameters    | 4432 / 0 / 283                              |                   |
| Goodness-of-fit on F <sup>2</sup> | 1.040                                       |                   |
| Final R indices [I > 2σ(I)]       | R1 = 0.0484, wR2 = 0.1261                   |                   |

|                             |                                    |
|-----------------------------|------------------------------------|
| R indices (all data)        | R1 = 0.0581, wR2 = 0.1373          |
| Extinction coefficient      | n/a                                |
| Largest diff. peak and hole | 0.280 and -0.202 e.Å <sup>-3</sup> |

**Table S10. Atomic coordinates ( $\times 10^4$ ) and equivalent isotropic displacement parameters ( $\text{\AA}^2 \times 10^3$ ) for 3aa. U (eq) is defined as one third of the trace of the orthogonalized  $U^{ij}$  tensor.**

|       | x       | y       | z        | U(eq) |
|-------|---------|---------|----------|-------|
| N(1)  | 7497(1) | 4753(1) | 6738(1)  | 35(1) |
| O(1)  | 8144(1) | 6566(1) | 10670(1) | 66(1) |
| C(1)  | 5746(1) | 5372(1) | 7425(1)  | 37(1) |
| C(2)  | 5731(1) | 4602(1) | 7804(1)  | 35(1) |
| C(3)  | 4863(1) | 4215(1) | 8413(1)  | 44(1) |
| C(6)  | 6962(2) | 3539(1) | 7503(2)  | 50(1) |
| C(5)  | 6074(2) | 3156(1) | 8119(2)  | 60(1) |
| C(4)  | 5041(2) | 3484(1) | 8566(2)  | 56(1) |
| C(7)  | 6775(1) | 4267(1) | 7348(1)  | 36(1) |
| C(8)  | 7206(1) | 5473(1) | 7220(1)  | 32(1) |
| C(9)  | 7153(1) | 6022(1) | 5950(1)  | 41(1) |
| C(10) | 6789(2) | 6750(1) | 6439(2)  | 51(1) |
| C(11) | 7833(2) | 6985(1) | 8041(2)  | 54(1) |
| C(12) | 8094(1) | 6430(1) | 9319(1)  | 43(1) |
| C(13) | 8318(1) | 5688(1) | 8829(1)  | 39(1) |
| C(14) | 8877(1) | 4576(1) | 6640(1)  | 40(1) |
| C(15) | 8772(1) | 4144(1) | 5169(1)  | 36(1) |
| C(16) | 9457(1) | 3501(1) | 5297(2)  | 45(1) |
| C(17) | 9338(2) | 3101(1) | 3944(2)  | 54(1) |
| C(18) | 8538(2) | 3345(1) | 2453(2)  | 55(1) |
| C(19) | 7875(1) | 3993(1) | 2304(2)  | 54(1) |
| C(20) | 7991(1) | 4391(1) | 3659(2)  | 45(1) |

**Table S11. Bond lengths [ $\text{\AA}$ ] and angles [ $^\circ$ ] for 3aa.**

|            |            |
|------------|------------|
| N(1)-C(7)  | 1.4044(18) |
| N(1)-C(14) | 1.474(2)   |
| N(1)-C(8)  | 1.500(2)   |
| O(1)-C(12) | 1.219(2)   |



|             |            |
|-------------|------------|
| C(1)-C(2)   | 1.511(3)   |
| C(1)-C(8)   | 1.567(3)   |
| C(1)-H(18)  | 1.020(14)  |
| C(1)-H(19)  | 0.976(15)  |
| C(2)-C(3)   | 1.3938(19) |
| C(2)-C(7)   | 1.412(2)   |
| C(3)-C(4)   | 1.410(3)   |
| C(3)-H(1)   | 0.984(17)  |
| C(6)-C(7)   | 1.403(3)   |
| C(6)-C(5)   | 1.410(2)   |
| C(6)-H(4)   | 0.972(17)  |
| C(5)-C(4)   | 1.391(3)   |
| C(5)-H(3)   | 1.01(2)    |
| C(4)-H(2)   | 0.985(19)  |
| C(8)-C(9)   | 1.533(2)   |
| C(8)-C(13)  | 1.554(2)   |
| C(9)-C(10)  | 1.539(2)   |
| C(9)-H(16)  | 1.011(15)  |
| C(9)-H(17)  | 1.007(16)  |
| C(10)-C(11) | 1.534(3)   |
| C(10)-H(21) | 0.982(19)  |
| C(10)-H(20) | 1.016(16)  |
| C(11)-C(12) | 1.515(2)   |
| C(11)-H(14) | 1.042(19)  |
| C(11)-H(15) | 0.970(19)  |
| C(12)-C(13) | 1.524(2)   |
| C(13)-H(12) | 0.988(17)  |
| C(13)-H(13) | 0.978(16)  |
| C(14)-C(15) | 1.526(2)   |
| C(14)-H(10) | 1.002(16)  |
| C(14)-H(11) | 0.992(16)  |
| C(15)-C(20) | 1.396(2)   |
| C(15)-C(16) | 1.399(2)   |
| C(16)-C(17) | 1.400(2)   |
| C(16)-H(9)  | 0.973(18)  |
| C(17)-C(18) | 1.386(3)   |
| C(17)-H(8)  | 0.98(2)    |
| C(18)-C(19) | 1.395(3)   |

|                  |            |
|------------------|------------|
| C(18)-H(7)       | 1.00(2)    |
| C(19)-C(20)      | 1.400(2)   |
| C(19)-H(6)       | 0.978(18)  |
| C(20)-H(5)       | 0.969(17)  |
| <br>             |            |
| C(7)-N(1)-C(14)  | 120.30(12) |
| C(7)-N(1)-C(8)   | 108.38(12) |
| C(14)-N(1)-C(8)  | 120.75(8)  |
| C(2)-C(1)-C(8)   | 103.22(8)  |
| C(2)-C(1)-H(18)  | 109.9(8)   |
| C(8)-C(1)-H(18)  | 109.4(8)   |
| C(2)-C(1)-H(19)  | 112.9(9)   |
| C(8)-C(1)-H(19)  | 112.3(9)   |
| H(18)-C(1)-H(19) | 109.0(12)  |
| C(3)-C(2)-C(7)   | 120.64(14) |
| C(3)-C(2)-C(1)   | 131.22(11) |
| C(7)-C(2)-C(1)   | 108.07(10) |
| C(2)-C(3)-C(4)   | 119.01(13) |
| C(2)-C(3)-H(1)   | 119.6(10)  |
| C(4)-C(3)-H(1)   | 121.4(10)  |
| C(7)-C(6)-C(5)   | 117.95(14) |
| C(7)-C(6)-H(4)   | 121.4(10)  |
| C(5)-C(6)-H(4)   | 120.6(10)  |
| C(4)-C(5)-C(6)   | 121.60(15) |
| C(4)-C(5)-H(3)   | 120.7(11)  |
| C(6)-C(5)-H(3)   | 117.7(11)  |
| C(5)-C(4)-C(3)   | 120.13(12) |
| C(5)-C(4)-H(2)   | 118.8(11)  |
| C(3)-C(4)-H(2)   | 121.1(11)  |
| C(6)-C(7)-N(1)   | 128.52(12) |
| C(6)-C(7)-C(2)   | 120.67(11) |
| N(1)-C(7)-C(2)   | 110.80(13) |
| N(1)-C(8)-C(9)   | 112.03(12) |
| N(1)-C(8)-C(13)  | 110.83(9)  |
| C(9)-C(8)-C(13)  | 109.73(12) |
| N(1)-C(8)-C(1)   | 101.94(9)  |
| C(9)-C(8)-C(1)   | 111.93(9)  |
| C(13)-C(8)-C(1)  | 110.19(12) |

|                   |            |
|-------------------|------------|
| C(8)-C(9)-C(10)   | 111.04(13) |
| C(8)-C(9)-H(16)   | 108.9(9)   |
| C(10)-C(9)-H(16)  | 110.3(9)   |
| C(8)-C(9)-H(17)   | 108.5(9)   |
| C(10)-C(9)-H(17)  | 111.1(9)   |
| H(16)-C(9)-H(17)  | 106.8(12)  |
| C(11)-C(10)-C(9)  | 111.89(12) |
| C(11)-C(10)-H(21) | 109.7(10)  |
| C(9)-C(10)-H(21)  | 110.2(10)  |
| C(11)-C(10)-H(20) | 109.5(9)   |
| C(9)-C(10)-H(20)  | 109.2(9)   |
| H(21)-C(10)-H(20) | 106.2(13)  |
| C(12)-C(11)-C(10) | 112.84(13) |
| C(12)-C(11)-H(14) | 106.0(11)  |
| C(10)-C(11)-H(14) | 107.1(10)  |
| C(12)-C(11)-H(15) | 108.4(10)  |
| C(10)-C(11)-H(15) | 112.2(11)  |
| H(14)-C(11)-H(15) | 110.1(15)  |
| O(1)-C(12)-C(11)  | 122.42(14) |
| O(1)-C(12)-C(13)  | 121.48(12) |
| C(11)-C(12)-C(13) | 116.09(14) |
| C(12)-C(13)-C(8)  | 112.26(10) |
| C(12)-C(13)-H(12) | 105.2(10)  |
| C(8)-C(13)-H(12)  | 109.3(9)   |
| C(12)-C(13)-H(13) | 109.6(9)   |
| C(8)-C(13)-H(13)  | 110.8(9)   |
| H(12)-C(13)-H(13) | 109.5(13)  |
| N(1)-C(14)-C(15)  | 112.60(9)  |
| N(1)-C(14)-H(10)  | 107.0(9)   |
| C(15)-C(14)-H(10) | 109.9(8)   |
| N(1)-C(14)-H(11)  | 111.0(9)   |
| C(15)-C(14)-H(11) | 108.3(9)   |
| H(10)-C(14)-H(11) | 107.9(12)  |
| C(20)-C(15)-C(16) | 118.66(11) |
| C(20)-C(15)-C(14) | 120.17(14) |
| C(16)-C(15)-C(14) | 121.16(11) |
| C(15)-C(16)-C(17) | 120.90(13) |
| C(15)-C(16)-H(9)  | 118.7(10)  |

|                   |            |
|-------------------|------------|
| C(17)-C(16)-H(9)  | 120.4(10)  |
| C(18)-C(17)-C(16) | 119.93(15) |
| C(18)-C(17)-H(8)  | 119.2(11)  |
| C(16)-C(17)-H(8)  | 120.8(11)  |
| C(17)-C(18)-C(19) | 119.78(13) |
| C(17)-C(18)-H(7)  | 119.0(11)  |
| C(19)-C(18)-H(7)  | 121.2(11)  |
| C(18)-C(19)-C(20) | 120.17(14) |
| C(18)-C(19)-H(6)  | 120.2(11)  |
| C(20)-C(19)-H(6)  | 119.6(11)  |
| C(15)-C(20)-C(19) | 120.53(15) |
| C(15)-C(20)-H(5)  | 118.0(9)   |
| C(19)-C(20)-H(5)  | 121.5(9)   |

---

Symmetry transformations used to generate equivalent atoms:

**Table S12. Anisotropic displacement parameters ( $\text{\AA}^2 \times 10^3$ ) for 3aa. The anisotropic displacement factor exponent takes the form:  $-2p^2 [ h^2 a^*2U^{11} + \dots + 2 h k a^* b^* U^{12} ]$**

|       | U <sup>11</sup> | U <sup>22</sup> | U <sup>33</sup> | U <sup>23</sup> | U <sup>13</sup> | U <sup>12</sup> |
|-------|-----------------|-----------------|-----------------|-----------------|-----------------|-----------------|
| N(1)  | 36(1)           | 31(1)           | 42(1)           | -6(1)           | 17(1)           | -3(1)           |
| O(1)  | 89(1)           | 67(1)           | 42(1)           | -15(1)          | 20(1)           | 6(1)            |
| C(1)  | 35(1)           | 38(1)           | 38(1)           | 0(1)            | 14(1)           | 2(1)            |
| C(2)  | 35(1)           | 39(1)           | 30(1)           | -1(1)           | 9(1)            | -4(1)           |
| C(3)  | 41(1)           | 54(1)           | 37(1)           | 1(1)            | 14(1)           | -8(1)           |
| C(6)  | 60(1)           | 34(1)           | 59(1)           | -2(1)           | 26(1)           | -2(1)           |
| C(5)  | 76(1)           | 37(1)           | 69(1)           | 3(1)            | 29(1)           | -11(1)          |
| C(4)  | 64(1)           | 52(1)           | 55(1)           | 3(1)            | 26(1)           | -19(1)          |
| C(7)  | 37(1)           | 34(1)           | 34(1)           | -3(1)           | 11(1)           | -5(1)           |
| C(8)  | 34(1)           | 31(1)           | 30(1)           | -3(1)           | 11(1)           | -2(1)           |
| C(9)  | 54(1)           | 37(1)           | 34(1)           | 1(1)            | 17(1)           | -3(1)           |
| C(10) | 74(1)           | 35(1)           | 46(1)           | 7(1)            | 24(1)           | 5(1)            |
| C(11) | 77(1)           | 34(1)           | 54(1)           | -9(1)           | 29(1)           | -6(1)           |
| C(12) | 42(1)           | 45(1)           | 40(1)           | -11(1)          | 12(1)           | -4(1)           |
| C(13) | 40(1)           | 39(1)           | 34(1)           | -4(1)           | 7(1)            | -1(1)           |
| C(14) | 32(1)           | 44(1)           | 43(1)           | -9(1)           | 12(1)           | -1(1)           |
| C(15) | 30(1)           | 40(1)           | 38(1)           | -4(1)           | 14(1)           | -1(1)           |

|       |       |       |       |        |       |       |
|-------|-------|-------|-------|--------|-------|-------|
| C(16) | 49(1) | 45(1) | 42(1) | 1(1)   | 16(1) | 10(1) |
| C(17) | 64(1) | 47(1) | 55(1) | -7(1)  | 24(1) | 10(1) |
| C(18) | 58(1) | 63(1) | 47(1) | -16(1) | 21(1) | -2(1) |
| C(19) | 47(1) | 72(1) | 38(1) | 0(1)   | 9(1)  | 5(1)  |
| C(20) | 39(1) | 50(1) | 45(1) | 2(1)   | 12(1) | 8(1)  |

**Table S13. Hydrogen coordinates ( $\times 10^4$ ) and isotropic displacement parameters ( $\text{\AA}^2 \times 10^3$ ) for 3aa.**

|       | x         | y        | z        | U(eq) |
|-------|-----------|----------|----------|-------|
| H(1)  | 4152(18)  | 4458(9)  | 8743(19) | 59(4) |
| H(2)  | 4442(19)  | 3195(10) | 8990(20) | 73(5) |
| H(3)  | 6220(20)  | 2635(11) | 8240(20) | 77(5) |
| H(6)  | 7330(20)  | 4174(10) | 1250(20) | 71(5) |
| H(5)  | 7520(17)  | 4837(9)  | 3585(18) | 56(4) |
| H(4)  | 7667(17)  | 3302(9)  | 7177(18) | 54(4) |
| H(7)  | 8450(20)  | 3050(10) | 1500(20) | 75(5) |
| H(8)  | 9798(19)  | 2643(11) | 4040(20) | 75(5) |
| H(9)  | 10025(18) | 3335(9)  | 6350(20) | 64(5) |
| H(10) | 9367(16)  | 5030(8)  | 6618(17) | 48(4) |
| H(11) | 9449(16)  | 4311(8)  | 7594(18) | 51(4) |
| H(12) | 9252(18)  | 5693(9)  | 8716(18) | 56(4) |
| H(13) | 8320(15)  | 5360(8)  | 9671(18) | 51(4) |
| H(14) | 8790(20)  | 7065(10) | 7880(20) | 74(5) |
| H(15) | 7537(18)  | 7412(10) | 8430(20) | 69(5) |
| H(16) | 8090(16)  | 6035(8)  | 5787(17) | 51(4) |
| H(17) | 6444(17)  | 5868(8)  | 4912(19) | 55(4) |
| H(18) | 4974(15)  | 5480(7)  | 6376(17) | 43(3) |
| H(19) | 5630(15)  | 5672(8)  | 8254(17) | 51(4) |
| H(21) | 6760(18)  | 7096(9)  | 5620(20) | 66(5) |
| H(20) | 5810(17)  | 6737(8)  | 6505(18) | 53(4) |

**Table S14. Torsion angles [ $^\circ$ ] for 3aa.**

|                     |            |
|---------------------|------------|
| C(8)-C(1)-C(2)-C(3) | 165.64(11) |
|---------------------|------------|

|                         |             |
|-------------------------|-------------|
| C(8)-C(1)-C(2)-C(7)     | -17.57(11)  |
| C(7)-C(2)-C(3)-C(4)     | -0.04(17)   |
| C(1)-C(2)-C(3)-C(4)     | 176.41(12)  |
| C(7)-C(6)-C(5)-C(4)     | -0.1(2)     |
| C(6)-C(5)-C(4)-C(3)     | -0.2(2)     |
| C(2)-C(3)-C(4)-C(5)     | 0.2(2)      |
| C(5)-C(6)-C(7)-N(1)     | -178.35(12) |
| C(5)-C(6)-C(7)-C(2)     | 0.22(19)    |
| C(14)-N(1)-C(7)-C(6)    | -19.91(17)  |
| C(8)-N(1)-C(7)-C(6)     | -164.80(12) |
| C(14)-N(1)-C(7)-C(2)    | 161.41(9)   |
| C(8)-N(1)-C(7)-C(2)     | 16.52(12)   |
| C(3)-C(2)-C(7)-C(6)     | -0.17(16)   |
| C(1)-C(2)-C(7)-C(6)     | -177.37(11) |
| C(3)-C(2)-C(7)-N(1)     | 178.63(10)  |
| C(1)-C(2)-C(7)-N(1)     | 1.43(12)    |
| C(7)-N(1)-C(8)-C(9)     | -146.12(10) |
| C(14)-N(1)-C(8)-C(9)    | 69.18(13)   |
| C(7)-N(1)-C(8)-C(13)    | 90.95(15)   |
| C(14)-N(1)-C(8)-C(13)   | -53.75(14)  |
| C(7)-N(1)-C(8)-C(1)     | -26.30(11)  |
| C(14)-N(1)-C(8)-C(1)    | -171.00(9)  |
| C(2)-C(1)-C(8)-N(1)     | 25.85(11)   |
| C(2)-C(1)-C(8)-C(9)     | 145.75(9)   |
| C(2)-C(1)-C(8)-C(13)    | -91.86(11)  |
| N(1)-C(8)-C(9)-C(10)    | 177.46(10)  |
| C(13)-C(8)-C(9)-C(10)   | -58.99(15)  |
| C(1)-C(8)-C(9)-C(10)    | 63.67(13)   |
| C(8)-C(9)-C(10)-C(11)   | 57.53(17)   |
| C(9)-C(10)-C(11)-C(12)  | -49.07(17)  |
| C(10)-C(11)-C(12)-O(1)  | -136.41(15) |
| C(10)-C(11)-C(12)-C(13) | 44.71(18)   |
| O(1)-C(12)-C(13)-C(8)   | 134.10(14)  |
| C(11)-C(12)-C(13)-C(8)  | -47.01(16)  |
| N(1)-C(8)-C(13)-C(12)   | 177.37(9)   |
| C(9)-C(8)-C(13)-C(12)   | 53.12(14)   |
| C(1)-C(8)-C(13)-C(12)   | -70.56(13)  |
| C(7)-N(1)-C(14)-C(15)   | 82.03(15)   |

|                         |             |
|-------------------------|-------------|
| C(8)-N(1)-C(14)-C(15)   | -137.40(10) |
| N(1)-C(14)-C(15)-C(20)  | 55.32(15)   |
| N(1)-C(14)-C(15)-C(16)  | -125.19(12) |
| C(20)-C(15)-C(16)-C(17) | -1.50(19)   |
| C(14)-C(15)-C(16)-C(17) | 179.01(12)  |
| C(15)-C(16)-C(17)-C(18) | 0.3(2)      |
| C(16)-C(17)-C(18)-C(19) | 1.1(2)      |
| C(17)-C(18)-C(19)-C(20) | -1.4(2)     |
| C(16)-C(15)-C(20)-C(19) | 1.26(18)    |
| C(14)-C(15)-C(20)-C(19) | -179.23(11) |
| C(18)-C(19)-C(20)-C(15) | 0.1(2)      |

Symmetry transformations used to generate equivalent atoms:

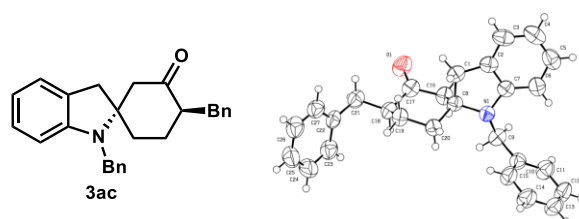

**Table S15. Crystal data and structure refinement for 3ac.**

|                                 |                                                         |                                         |
|---------------------------------|---------------------------------------------------------|-----------------------------------------|
| Identification code             | CCDC 1905675                                            |                                         |
| Empirical formula               | C <sub>27</sub> H <sub>27</sub> NO                      |                                         |
| Formula weight                  | 381.49                                                  |                                         |
| Temperature                     | 296(2) K                                                |                                         |
| Wavelength                      | 1.54178 Å                                               |                                         |
| Crystal system                  | Monoclinic                                              |                                         |
| Space group                     | Cc                                                      |                                         |
| Unit cell dimensions            | a = 13.7872(5) Å<br>b = 16.2182(8) Å<br>c = 9.4765(4) Å | a = 90°.<br>b = 96.759(3)°.<br>g = 90°. |
| Volume                          | 2104.25(16) Å <sup>3</sup>                              |                                         |
| Z                               | 4                                                       |                                         |
| Density (calculated)            | 1.204 Mg/m <sup>3</sup>                                 |                                         |
| Absorption coefficient          | 0.555 mm <sup>-1</sup>                                  |                                         |
| F(000)                          | 816                                                     |                                         |
| Crystal size                    | 0.120 x 0.060 x 0.040 mm <sup>3</sup>                   |                                         |
| Theta range for data collection | 4.226 to 66.443°.                                       |                                         |

|                                   |                                             |
|-----------------------------------|---------------------------------------------|
| Index ranges                      | -16<=h<=16, -19<=k<=15, -10<=l<=11          |
| Reflections collected             | 5476                                        |
| Independent reflections           | 2802 [R(int) = 0.0326]                      |
| Completeness to theta = 66.443°   | 99.2 %                                      |
| Absorption correction             | Semi-empirical from equivalents             |
| Max. and min. transmission        | 0.7528 and 0.5648                           |
| Refinement method                 | Full-matrix least-squares on F <sup>2</sup> |
| Data / restraints / parameters    | 2802 / 2 / 262                              |
| Goodness-of-fit on F <sup>2</sup> | 1.049                                       |
| Final R indices [I>2sigma(I)]     | R1 = 0.0403, wR2 = 0.1050                   |
| R indices (all data)              | R1 = 0.0411, wR2 = 0.1063                   |
| Absolute structure parameter      | -0.2(3)                                     |
| Extinction coefficient            | n/a                                         |
| Largest diff. peak and hole       | 0.208 and -0.144 e.Å <sup>-3</sup>          |

**Table S16. Atomic coordinates (x 10<sup>4</sup>) and equivalent isotropic displacement parameters (Å<sup>2</sup>x 10<sup>3</sup>) for 3ac. U (eq) is defined as one third of the trace of the orthogonalized U<sup>ij</sup> tensor.**

|       | x       | y       | z       | U(eq) |
|-------|---------|---------|---------|-------|
| O(1)  | 4755(2) | 5511(2) | 9686(2) | 76(1) |
| N(1)  | 2900(1) | 6614(1) | 5541(2) | 49(1) |
| C(1)  | 3751(2) | 7365(2) | 7438(3) | 58(1) |
| C(2)  | 2686(2) | 7570(1) | 7261(3) | 55(1) |
| C(3)  | 2153(2) | 8121(2) | 7978(3) | 70(1) |
| C(4)  | 1169(2) | 8211(2) | 7561(4) | 78(1) |
| C(5)  | 712(2)  | 7758(2) | 6437(4) | 76(1) |
| C(6)  | 1243(2) | 7196(2) | 5709(3) | 63(1) |
| C(7)  | 2225(2) | 7111(1) | 6131(2) | 51(1) |
| C(8)  | 3810(2) | 6570(1) | 6549(2) | 48(1) |
| C(9)  | 2557(2) | 5895(2) | 4701(3) | 56(1) |
| C(10) | 2212(2) | 6092(1) | 3161(3) | 52(1) |
| C(11) | 1334(2) | 5808(2) | 2507(3) | 69(1) |
| C(12) | 1042(2) | 5966(2) | 1091(4) | 77(1) |
| C(13) | 1622(2) | 6426(2) | 311(3)  | 72(1) |
| C(14) | 2498(2) | 6705(2) | 947(3)  | 78(1) |
| C(15) | 2793(2) | 6546(2) | 2363(3) | 66(1) |
| C(16) | 3804(2) | 5794(2) | 7493(3) | 54(1) |



|       |         |         |         |       |
|-------|---------|---------|---------|-------|
| C(17) | 4745(2) | 5665(1) | 8437(3) | 54(1) |
| C(18) | 5675(2) | 5715(2) | 7705(3) | 54(1) |
| C(19) | 5652(2) | 6498(2) | 6795(3) | 56(1) |
| C(20) | 4715(2) | 6556(2) | 5761(2) | 53(1) |
| C(21) | 6585(2) | 5645(2) | 8781(3) | 62(1) |
| C(22) | 7531(2) | 5721(2) | 8140(3) | 55(1) |
| C(23) | 7773(2) | 5163(2) | 7126(4) | 69(1) |
| C(24) | 8634(2) | 5230(2) | 6540(4) | 82(1) |
| C(25) | 9288(2) | 5846(2) | 6978(4) | 79(1) |
| C(26) | 9055(2) | 6403(2) | 7984(4) | 77(1) |
| C(27) | 8193(2) | 6341(2) | 8546(3) | 66(1) |

---

**Table S17. Bond lengths [Å] and angles [°] for 3ac.**

|             |          |
|-------------|----------|
| O(1)-C(17)  | 1.208(3) |
| N(1)-C(7)   | 1.396(3) |
| N(1)-C(9)   | 1.460(3) |
| N(1)-C(8)   | 1.487(3) |
| C(1)-C(2)   | 1.496(4) |
| C(1)-C(8)   | 1.548(3) |
| C(1)-H(1A)  | 0.9700   |
| C(1)-H(1AB) | 0.9700   |
| C(2)-C(3)   | 1.385(4) |
| C(2)-C(7)   | 1.395(4) |
| C(3)-C(4)   | 1.375(5) |
| C(3)-H(3)   | 0.9300   |
| C(4)-C(5)   | 1.383(6) |
| C(4)-H(4)   | 0.9300   |
| C(5)-C(6)   | 1.401(4) |
| C(5)-H(5)   | 0.9300   |
| C(6)-C(7)   | 1.372(3) |
| C(6)-H(6)   | 0.9300   |
| C(8)-C(20)  | 1.528(3) |
| C(8)-C(16)  | 1.544(3) |
| C(9)-C(10)  | 1.515(3) |
| C(9)-H(9A)  | 0.9700   |
| C(9)-H(9AB) | 0.9700   |

|              |          |
|--------------|----------|
| C(10)-C(11)  | 1.372(4) |
| C(10)-C(15)  | 1.378(4) |
| C(11)-C(12)  | 1.379(4) |
| C(11)-H(11)  | 0.9300   |
| C(12)-C(13)  | 1.371(5) |
| C(12)-H(12)  | 0.9300   |
| C(13)-C(14)  | 1.362(4) |
| C(13)-H(13)  | 0.9300   |
| C(14)-C(15)  | 1.380(4) |
| C(14)-H(14)  | 0.9300   |
| C(15)-H(15)  | 0.9300   |
| C(16)-C(17)  | 1.502(3) |
| C(16)-H(16A) | 0.9700   |
| C(16)-H(16B) | 0.9700   |
| C(17)-C(18)  | 1.530(3) |
| C(18)-C(21)  | 1.525(3) |
| C(18)-C(19)  | 1.534(3) |
| C(18)-H(18)  | 0.9800   |
| C(19)-C(20)  | 1.530(3) |
| C(19)-H(19A) | 0.9700   |
| C(19)-H(19B) | 0.9700   |
| C(20)-H(20A) | 0.9700   |
| C(20)-H(20B) | 0.9700   |
| C(21)-C(22)  | 1.507(4) |
| C(21)-H(21A) | 0.9700   |
| C(21)-H(21B) | 0.9700   |
| C(22)-C(27)  | 1.383(4) |
| C(22)-C(23)  | 1.388(4) |
| C(23)-C(24)  | 1.373(5) |
| C(23)-H(23)  | 0.9300   |
| C(24)-C(25)  | 1.377(5) |
| C(24)-H(24)  | 0.9300   |
| C(25)-C(26)  | 1.377(5) |
| C(25)-H(25)  | 0.9300   |
| C(26)-C(27)  | 1.362(5) |
| C(26)-H(26)  | 0.9300   |
| C(27)-H(27)  | 0.9300   |

|                   |            |
|-------------------|------------|
| C(7)-N(1)-C(9)    | 119.41(18) |
| C(7)-N(1)-C(8)    | 108.82(19) |
| C(9)-N(1)-C(8)    | 120.38(17) |
| C(2)-C(1)-C(8)    | 103.78(19) |
| C(2)-C(1)-H(1A)   | 111.0      |
| C(8)-C(1)-H(1A)   | 111.0      |
| C(2)-C(1)-H(1AB)  | 111.0      |
| C(8)-C(1)-H(1AB)  | 111.0      |
| H(1A)-C(1)-H(1AB) | 109.0      |
| C(3)-C(2)-C(7)    | 120.1(2)   |
| C(3)-C(2)-C(1)    | 131.3(3)   |
| C(7)-C(2)-C(1)    | 108.6(2)   |
| C(4)-C(3)-C(2)    | 119.3(3)   |
| C(4)-C(3)-H(3)    | 120.3      |
| C(2)-C(3)-H(3)    | 120.3      |
| C(3)-C(4)-C(5)    | 120.7(3)   |
| C(3)-C(4)-H(4)    | 119.7      |
| C(5)-C(4)-H(4)    | 119.7      |
| C(4)-C(5)-C(6)    | 120.5(3)   |
| C(4)-C(5)-H(5)    | 119.8      |
| C(6)-C(5)-H(5)    | 119.8      |
| C(7)-C(6)-C(5)    | 118.5(3)   |
| C(7)-C(6)-H(6)    | 120.7      |
| C(5)-C(6)-H(6)    | 120.7      |
| C(6)-C(7)-C(2)    | 121.0(2)   |
| C(6)-C(7)-N(1)    | 128.5(2)   |
| C(2)-C(7)-N(1)    | 110.53(19) |
| N(1)-C(8)-C(20)   | 111.26(18) |
| N(1)-C(8)-C(16)   | 110.52(17) |
| C(20)-C(8)-C(16)  | 109.38(17) |
| N(1)-C(8)-C(1)    | 102.39(17) |
| C(20)-C(8)-C(1)   | 112.06(18) |
| C(16)-C(8)-C(1)   | 111.09(19) |
| N(1)-C(9)-C(10)   | 113.62(19) |
| N(1)-C(9)-H(9A)   | 108.8      |
| C(10)-C(9)-H(9A)  | 108.8      |
| N(1)-C(9)-H(9AB)  | 108.8      |
| C(10)-C(9)-H(9AB) | 108.8      |

|                     |            |
|---------------------|------------|
| H(9A)-C(9)-H(9AB)   | 107.7      |
| C(11)-C(10)-C(15)   | 118.0(2)   |
| C(11)-C(10)-C(9)    | 121.6(2)   |
| C(15)-C(10)-C(9)    | 120.3(2)   |
| C(10)-C(11)-C(12)   | 121.2(3)   |
| C(10)-C(11)-H(11)   | 119.4      |
| C(12)-C(11)-H(11)   | 119.4      |
| C(13)-C(12)-C(11)   | 120.3(3)   |
| C(13)-C(12)-H(12)   | 119.9      |
| C(11)-C(12)-H(12)   | 119.9      |
| C(14)-C(13)-C(12)   | 119.0(3)   |
| C(14)-C(13)-H(13)   | 120.5      |
| C(12)-C(13)-H(13)   | 120.5      |
| C(13)-C(14)-C(15)   | 120.9(3)   |
| C(13)-C(14)-H(14)   | 119.6      |
| C(15)-C(14)-H(14)   | 119.6      |
| C(10)-C(15)-C(14)   | 120.6(2)   |
| C(10)-C(15)-H(15)   | 119.7      |
| C(14)-C(15)-H(15)   | 119.7      |
| C(17)-C(16)-C(8)    | 113.32(17) |
| C(17)-C(16)-H(16A)  | 108.9      |
| C(8)-C(16)-H(16A)   | 108.9      |
| C(17)-C(16)-H(16B)  | 108.9      |
| C(8)-C(16)-H(16B)   | 108.9      |
| H(16A)-C(16)-H(16B) | 107.7      |
| O(1)-C(17)-C(16)    | 121.5(2)   |
| O(1)-C(17)-C(18)    | 122.8(2)   |
| C(16)-C(17)-C(18)   | 115.7(2)   |
| C(21)-C(18)-C(17)   | 111.1(2)   |
| C(21)-C(18)-C(19)   | 113.48(19) |
| C(17)-C(18)-C(19)   | 109.66(18) |
| C(21)-C(18)-H(18)   | 107.4      |
| C(17)-C(18)-H(18)   | 107.4      |
| C(19)-C(18)-H(18)   | 107.4      |
| C(20)-C(19)-C(18)   | 111.77(18) |
| C(20)-C(19)-H(19A)  | 109.3      |
| C(18)-C(19)-H(19A)  | 109.3      |
| C(20)-C(19)-H(19B)  | 109.3      |

|                     |            |
|---------------------|------------|
| C(18)-C(19)-H(19B)  | 109.3      |
| H(19A)-C(19)-H(19B) | 107.9      |
| C(8)-C(20)-C(19)    | 111.38(19) |
| C(8)-C(20)-H(20A)   | 109.4      |
| C(19)-C(20)-H(20A)  | 109.4      |
| C(8)-C(20)-H(20B)   | 109.4      |
| C(19)-C(20)-H(20B)  | 109.4      |
| H(20A)-C(20)-H(20B) | 108.0      |
| C(22)-C(21)-C(18)   | 114.0(2)   |
| C(22)-C(21)-H(21A)  | 108.8      |
| C(18)-C(21)-H(21A)  | 108.8      |
| C(22)-C(21)-H(21B)  | 108.7      |
| C(18)-C(21)-H(21B)  | 108.7      |
| H(21A)-C(21)-H(21B) | 107.6      |
| C(27)-C(22)-C(23)   | 117.4(2)   |
| C(27)-C(22)-C(21)   | 121.5(2)   |
| C(23)-C(22)-C(21)   | 121.1(2)   |
| C(24)-C(23)-C(22)   | 121.2(2)   |
| C(24)-C(23)-H(23)   | 119.4      |
| C(22)-C(23)-H(23)   | 119.4      |
| C(23)-C(24)-C(25)   | 120.1(3)   |
| C(23)-C(24)-H(24)   | 119.9      |
| C(25)-C(24)-H(24)   | 119.9      |
| C(24)-C(25)-C(26)   | 119.1(3)   |
| C(24)-C(25)-H(25)   | 120.4      |
| C(26)-C(25)-H(25)   | 120.4      |
| C(27)-C(26)-C(25)   | 120.5(3)   |
| C(27)-C(26)-H(26)   | 119.8      |
| C(25)-C(26)-H(26)   | 119.8      |
| C(26)-C(27)-C(22)   | 121.6(3)   |
| C(26)-C(27)-H(27)   | 119.2      |
| C(22)-C(27)-H(27)   | 119.2      |

---

Symmetry transformations used to generate equivalent atoms:

**Table S18. Anisotropic displacement parameters ( $\text{\AA}^2 \times 10^3$ ) for 3ac. The anisotropic displacement factor exponent takes the form:  $-2p^2 [ h^2 a^{*2} U^{11} + \dots + 2 h k a^* b^* U^{12} ]$ .**

---

|       | U11   | U22    | U33    | U23    | U13    | U12    |
|-------|-------|--------|--------|--------|--------|--------|
| O(1)  | 78(1) | 96(2)  | 52(1)  | 24(1)  | 4(1)   | -11(1) |
| N(1)  | 49(1) | 49(1)  | 49(1)  | 1(1)   | 2(1)   | 1(1)   |
| C(1)  | 67(1) | 53(1)  | 52(1)  | 0(1)   | 4(1)   | -5(1)  |
| C(2)  | 69(1) | 47(1)  | 50(1)  | 7(1)   | 13(1)  | 1(1)   |
| C(3)  | 94(2) | 54(1)  | 65(2)  | 1(1)   | 26(1)  | 6(1)   |
| C(4)  | 91(2) | 66(2)  | 83(2)  | 13(2)  | 39(2)  | 20(1)  |
| C(5)  | 67(1) | 80(2)  | 83(2)  | 23(2)  | 22(1)  | 16(1)  |
| C(6)  | 56(1) | 69(1)  | 65(2)  | 15(1)  | 10(1)  | 4(1)   |
| C(7)  | 58(1) | 47(1)  | 49(1)  | 10(1)  | 11(1)  | 0(1)   |
| C(8)  | 51(1) | 48(1)  | 44(1)  | 7(1)   | 6(1)   | -1(1)  |
| C(9)  | 64(1) | 49(1)  | 52(1)  | 2(1)   | 1(1)   | -4(1)  |
| C(10) | 53(1) | 50(1)  | 53(1)  | -2(1)  | 4(1)   | 1(1)   |
| C(11) | 63(1) | 76(2)  | 66(2)  | 3(1)   | 3(1)   | -19(1) |
| C(12) | 65(1) | 92(2)  | 69(2)  | -2(2)  | -14(1) | -14(1) |
| C(13) | 80(2) | 84(2)  | 51(1)  | 2(1)   | -4(1)  | 3(1)   |
| C(14) | 74(2) | 102(2) | 57(2)  | 12(1)  | 8(1)   | -16(2) |
| C(15) | 56(1) | 85(2)  | 56(2)  | 6(1)   | 0(1)   | -14(1) |
| C(16) | 54(1) | 55(1)  | 54(1)  | 14(1)  | 6(1)   | -6(1)  |
| C(17) | 62(1) | 48(1)  | 53(1)  | 12(1)  | 6(1)   | -7(1)  |
| C(18) | 56(1) | 54(1)  | 50(1)  | 5(1)   | 1(1)   | 0(1)   |
| C(19) | 50(1) | 62(1)  | 56(1)  | 14(1)  | 5(1)   | -5(1)  |
| C(20) | 53(1) | 57(1)  | 48(1)  | 14(1)  | 8(1)   | 1(1)   |
| C(21) | 64(1) | 66(1)  | 52(1)  | 4(1)   | -4(1)  | 3(1)   |
| C(22) | 54(1) | 52(1)  | 55(1)  | 2(1)   | -11(1) | 4(1)   |
| C(23) | 62(1) | 56(1)  | 84(2)  | -14(1) | -7(1)  | -4(1)  |
| C(24) | 70(1) | 78(2)  | 97(2)  | -30(2) | 7(1)   | 6(1)   |
| C(25) | 55(1) | 80(2)  | 101(2) | -8(2)  | 5(1)   | 2(1)   |
| C(26) | 65(1) | 62(2)  | 99(2)  | -12(2) | -8(1)  | -10(1) |
| C(27) | 67(1) | 59(1)  | 69(2)  | -13(1) | -6(1)  | 2(1)   |

**Table S19. Hydrogen coordinates ( $\times 10^4$ ) and isotropic displacement parameters ( $\text{\AA}^2 \times 10^3$ ) for 3ac.**

|       | x    | y    | z    | U(eq) |
|-------|------|------|------|-------|
| H(1A) | 3988 | 7268 | 8428 | 69    |

|        |      |      |      |    |
|--------|------|------|------|----|
| H(1AB) | 4130 | 7806 | 7078 | 69 |
| H(3)   | 2457 | 8427 | 8734 | 84 |
| H(4)   | 808  | 8579 | 8040 | 93 |
| H(5)   | 47   | 7828 | 6161 | 91 |
| H(6)   | 938  | 6887 | 4958 | 76 |
| H(9A)  | 2023 | 5643 | 5128 | 67 |
| H(9AB) | 3082 | 5495 | 4737 | 67 |
| H(11)  | 928  | 5504 | 3028 | 82 |
| H(12)  | 450  | 5760 | 663  | 93 |
| H(13)  | 1420 | 6546 | -638 | 87 |
| H(14)  | 2902 | 7006 | 420  | 93 |
| H(15)  | 3390 | 6747 | 2783 | 79 |
| H(16A) | 3275 | 5840 | 8079 | 65 |
| H(16B) | 3676 | 5314 | 6888 | 65 |
| H(18)  | 5673 | 5242 | 7061 | 65 |
| H(19A) | 5700 | 6978 | 7411 | 67 |
| H(19B) | 6211 | 6500 | 6263 | 67 |
| H(20A) | 4731 | 7054 | 5197 | 63 |
| H(20B) | 4678 | 6088 | 5120 | 63 |
| H(21A) | 6563 | 6072 | 9493 | 74 |
| H(21B) | 6575 | 5117 | 9259 | 74 |
| H(23)  | 7344 | 4736 | 6839 | 83 |
| H(24)  | 8776 | 4859 | 5845 | 98 |
| H(25)  | 9879 | 5886 | 6600 | 95 |
| H(26)  | 9490 | 6824 | 8281 | 92 |
| H(27)  | 8047 | 6724 | 9219 | 80 |

---

**Table S20. Torsion angles [°] for 3ac.**

---

|                     |          |
|---------------------|----------|
| C(8)-C(1)-C(2)-C(3) | 167.4(2) |
| C(8)-C(1)-C(2)-C(7) | -14.6(2) |
| C(7)-C(2)-C(3)-C(4) | -0.2(4)  |
| C(1)-C(2)-C(3)-C(4) | 177.7(2) |
| C(2)-C(3)-C(4)-C(5) | -0.1(4)  |
| C(3)-C(4)-C(5)-C(6) | 0.5(4)   |
| C(4)-C(5)-C(6)-C(7) | -0.6(4)  |
| C(5)-C(6)-C(7)-C(2) | 0.3(4)   |

|                         |             |
|-------------------------|-------------|
| C(5)-C(6)-C(7)-N(1)     | -177.7(2)   |
| C(3)-C(2)-C(7)-C(6)     | 0.1(3)      |
| C(1)-C(2)-C(7)-C(6)     | -178.2(2)   |
| C(3)-C(2)-C(7)-N(1)     | 178.4(2)    |
| C(1)-C(2)-C(7)-N(1)     | 0.1(2)      |
| C(9)-N(1)-C(7)-C(6)     | -22.7(3)    |
| C(8)-N(1)-C(7)-C(6)     | -166.4(2)   |
| C(9)-N(1)-C(7)-C(2)     | 159.14(19)  |
| C(8)-N(1)-C(7)-C(2)     | 15.5(2)     |
| C(7)-N(1)-C(8)-C(20)    | -143.38(18) |
| C(9)-N(1)-C(8)-C(20)    | 73.4(2)     |
| C(7)-N(1)-C(8)-C(16)    | 94.9(2)     |
| C(9)-N(1)-C(8)-C(16)    | -48.3(3)    |
| C(7)-N(1)-C(8)-C(1)     | -23.5(2)    |
| C(9)-N(1)-C(8)-C(1)     | -166.75(19) |
| C(2)-C(1)-C(8)-N(1)     | 22.4(2)     |
| C(2)-C(1)-C(8)-C(20)    | 141.72(19)  |
| C(2)-C(1)-C(8)-C(16)    | -95.6(2)    |
| C(7)-N(1)-C(9)-C(10)    | 84.2(3)     |
| C(8)-N(1)-C(9)-C(10)    | -136.4(2)   |
| N(1)-C(9)-C(10)-C(11)   | -131.4(3)   |
| N(1)-C(9)-C(10)-C(15)   | 50.6(3)     |
| C(15)-C(10)-C(11)-C(12) | 0.5(5)      |
| C(9)-C(10)-C(11)-C(12)  | -177.6(3)   |
| C(10)-C(11)-C(12)-C(13) | -1.2(6)     |
| C(11)-C(12)-C(13)-C(14) | 1.7(6)      |
| C(12)-C(13)-C(14)-C(15) | -1.5(6)     |
| C(11)-C(10)-C(15)-C(14) | -0.3(5)     |
| C(9)-C(10)-C(15)-C(14)  | 177.9(3)    |
| C(13)-C(14)-C(15)-C(10) | 0.8(6)      |
| N(1)-C(8)-C(16)-C(17)   | 174.26(19)  |
| C(20)-C(8)-C(16)-C(17)  | 51.4(3)     |
| C(1)-C(8)-C(16)-C(17)   | -72.8(3)    |
| C(8)-C(16)-C(17)-O(1)   | 132.4(3)    |
| C(8)-C(16)-C(17)-C(18)  | -49.3(3)    |
| O(1)-C(17)-C(18)-C(21)  | -6.4(3)     |
| C(16)-C(17)-C(18)-C(21) | 175.4(2)    |
| O(1)-C(17)-C(18)-C(19)  | -132.7(3)   |



|                         |             |
|-------------------------|-------------|
| C(16)-C(17)-C(18)-C(19) | 49.1(3)     |
| C(21)-C(18)-C(19)-C(20) | -178.4(2)   |
| C(17)-C(18)-C(19)-C(20) | -53.5(3)    |
| N(1)-C(8)-C(20)-C(19)   | -179.24(18) |
| C(16)-C(8)-C(20)-C(19)  | -56.9(2)    |
| C(1)-C(8)-C(20)-C(19)   | 66.8(2)     |
| C(18)-C(19)-C(20)-C(8)  | 59.8(3)     |
| C(17)-C(18)-C(21)-C(22) | -177.9(2)   |
| C(19)-C(18)-C(21)-C(22) | -53.8(3)    |
| C(18)-C(21)-C(22)-C(27) | 119.6(3)    |
| C(18)-C(21)-C(22)-C(23) | -61.1(3)    |
| C(27)-C(22)-C(23)-C(24) | -0.6(5)     |
| C(21)-C(22)-C(23)-C(24) | -180.0(3)   |
| C(22)-C(23)-C(24)-C(25) | 1.6(6)      |
| C(23)-C(24)-C(25)-C(26) | -1.5(6)     |
| C(24)-C(25)-C(26)-C(27) | 0.5(6)      |
| C(25)-C(26)-C(27)-C(22) | 0.4(5)      |
| C(23)-C(22)-C(27)-C(26) | -0.4(4)     |
| C(21)-C(22)-C(27)-C(26) | 179.0(3)    |

---

Symmetry transformations used to generate equivalent atoms:

## Reference

1. H. Ren, Z. Chen, H. Li, G. Cao, J. Xu and M. Miao, *Synlett*, 2016, **28**, 504.
2. C. M. Le, X. Hou, T. Sperger, F. Schoenebeck and M. Lautens, *Angew. Chem. Int. Ed.*, 2015, **54**, 15897.
3. D. S. Muller, N. L. Untiedt, A. P. Dieskau, G. L. Lackner and L. E. Overman, *J. Am. Chem. Soc.*, 2015, **137**, 660.
4. H. Nagano, K. Yamada, N. Hazeki, Y. Mori and T. Hirano, *Bull. Chem. Soc. Jpn.*, 1992, **65**, 2421.
5. M. A. Grundl, A. Kaster, E. D. Beaulieu and D. Trauner, *Org. Lett.*, 2006, **8**, 5429.
6. S. Kehrli, D. Martin, D. Rix, M. Mauduit and A. Alexakis, *Chem. Eur. J.*, 2010, **16**, 9890.

# $^1\text{H}$ NMR and $^{13}\text{C}$ NMR Spectra of New Compounds

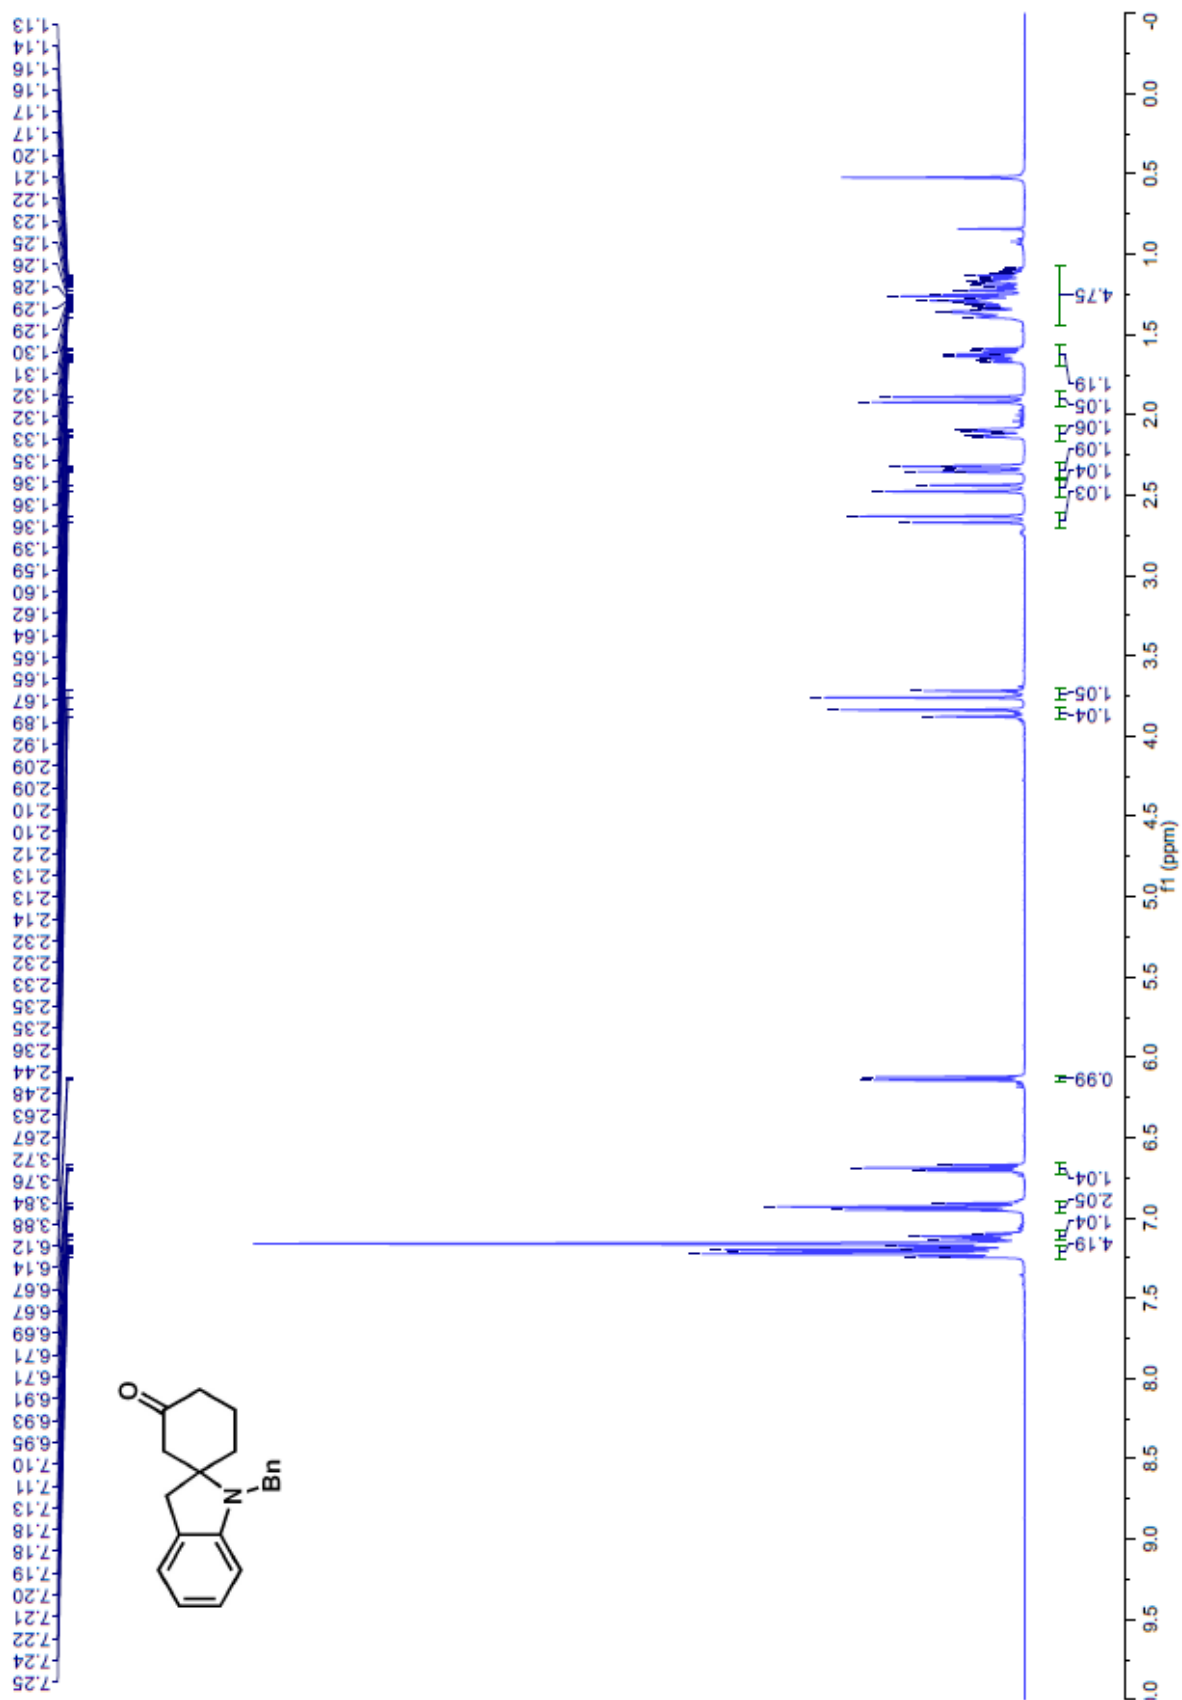

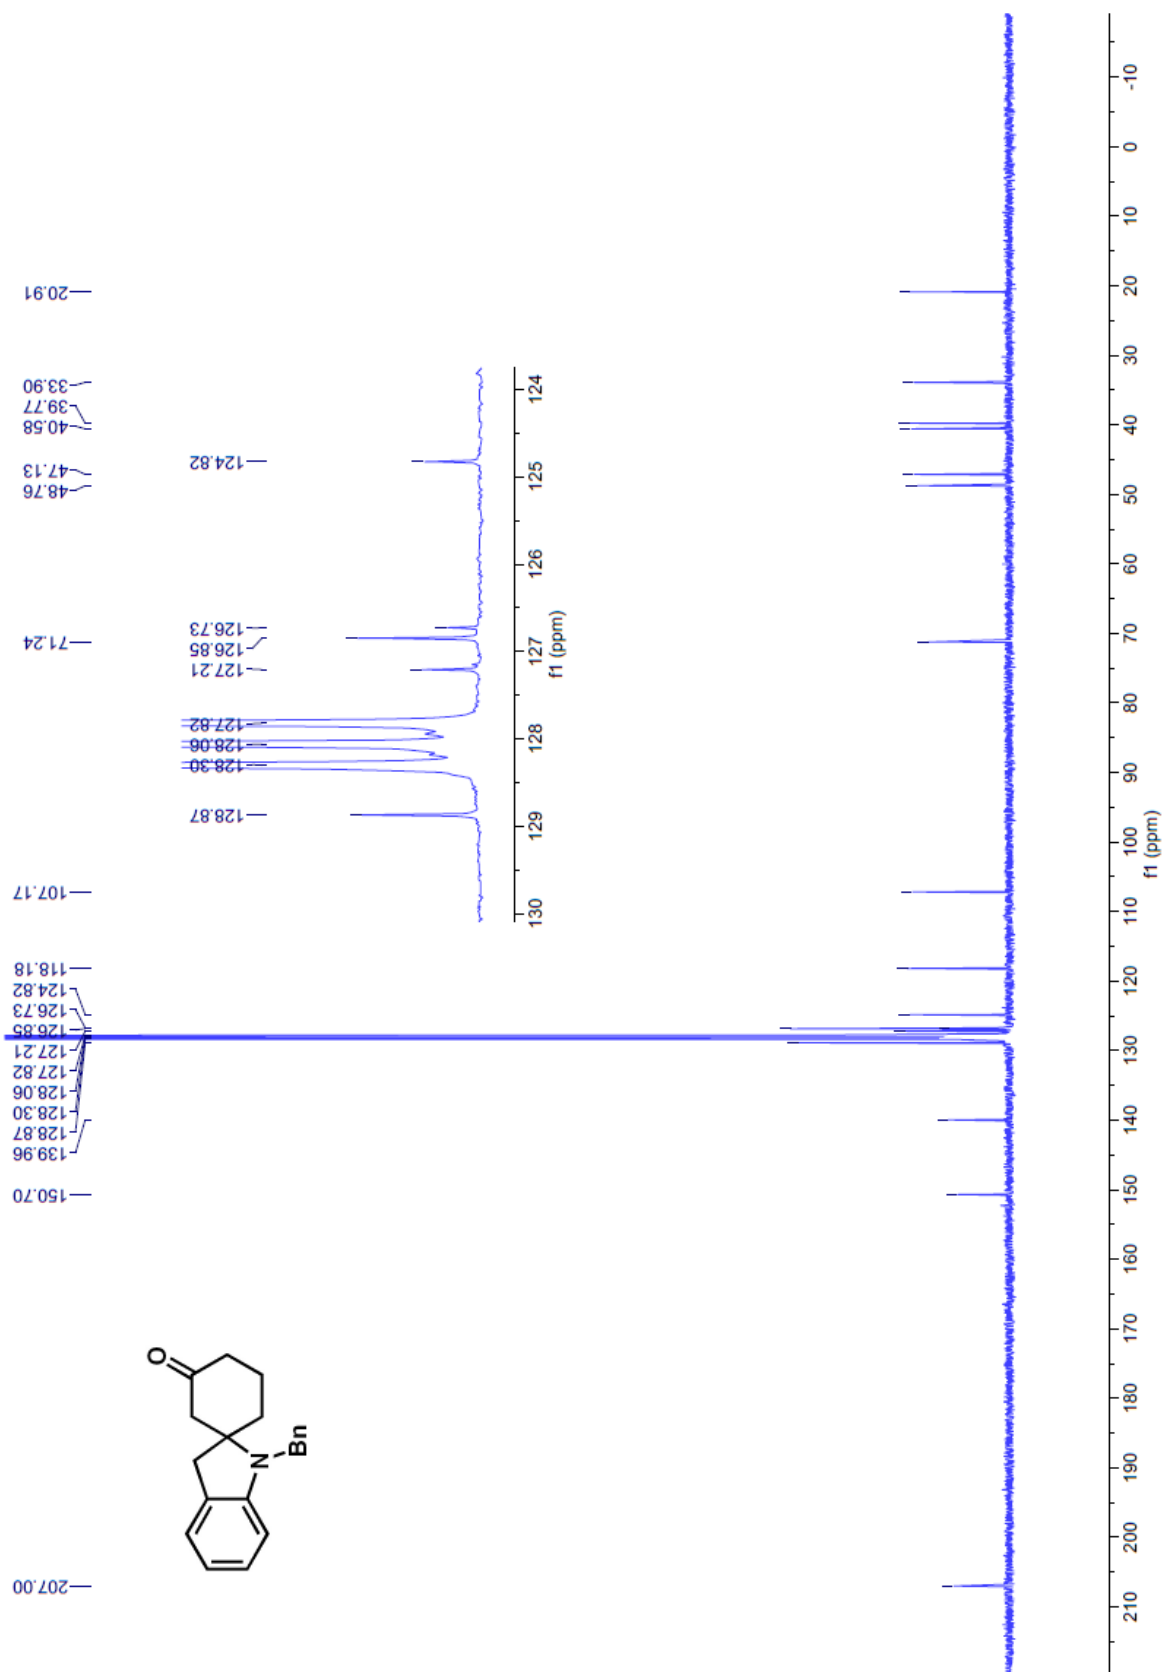

<sup>1</sup>H NMR (400 MHz, C<sub>6</sub>D<sub>6</sub>) of **3ba**

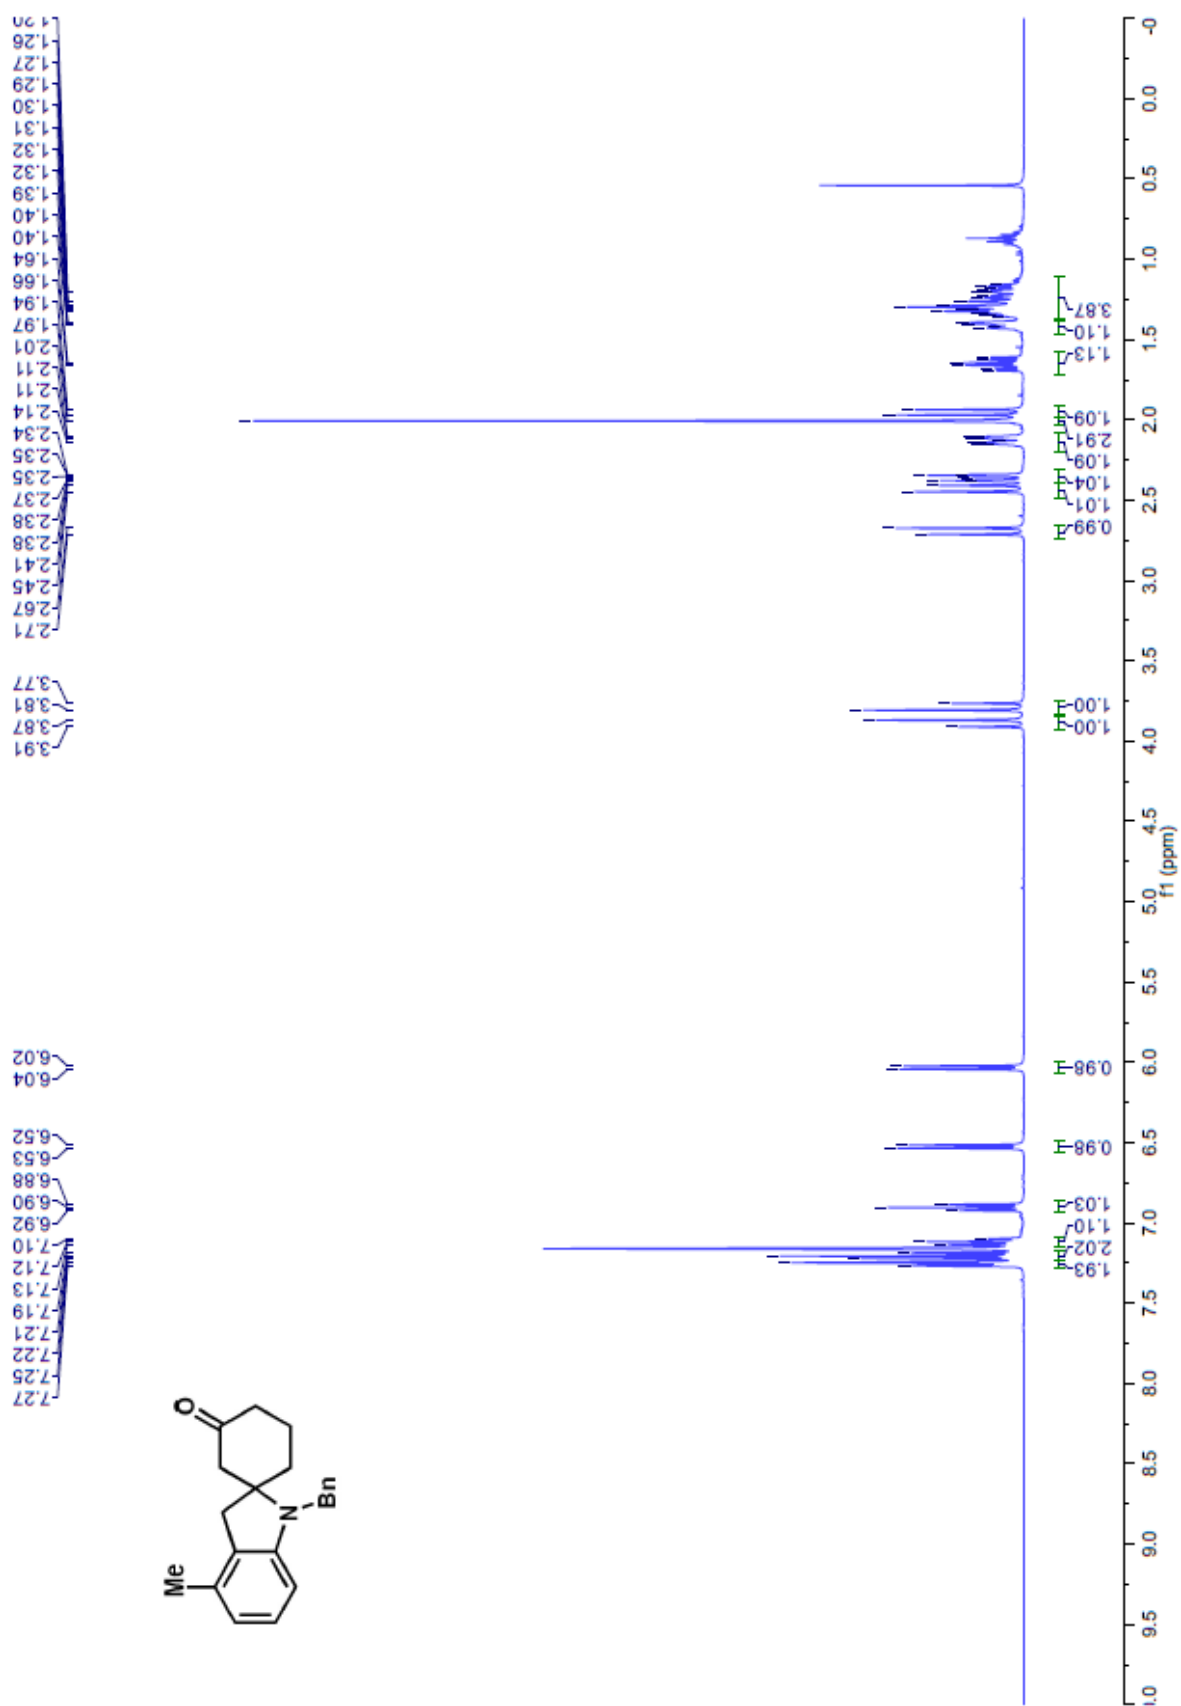

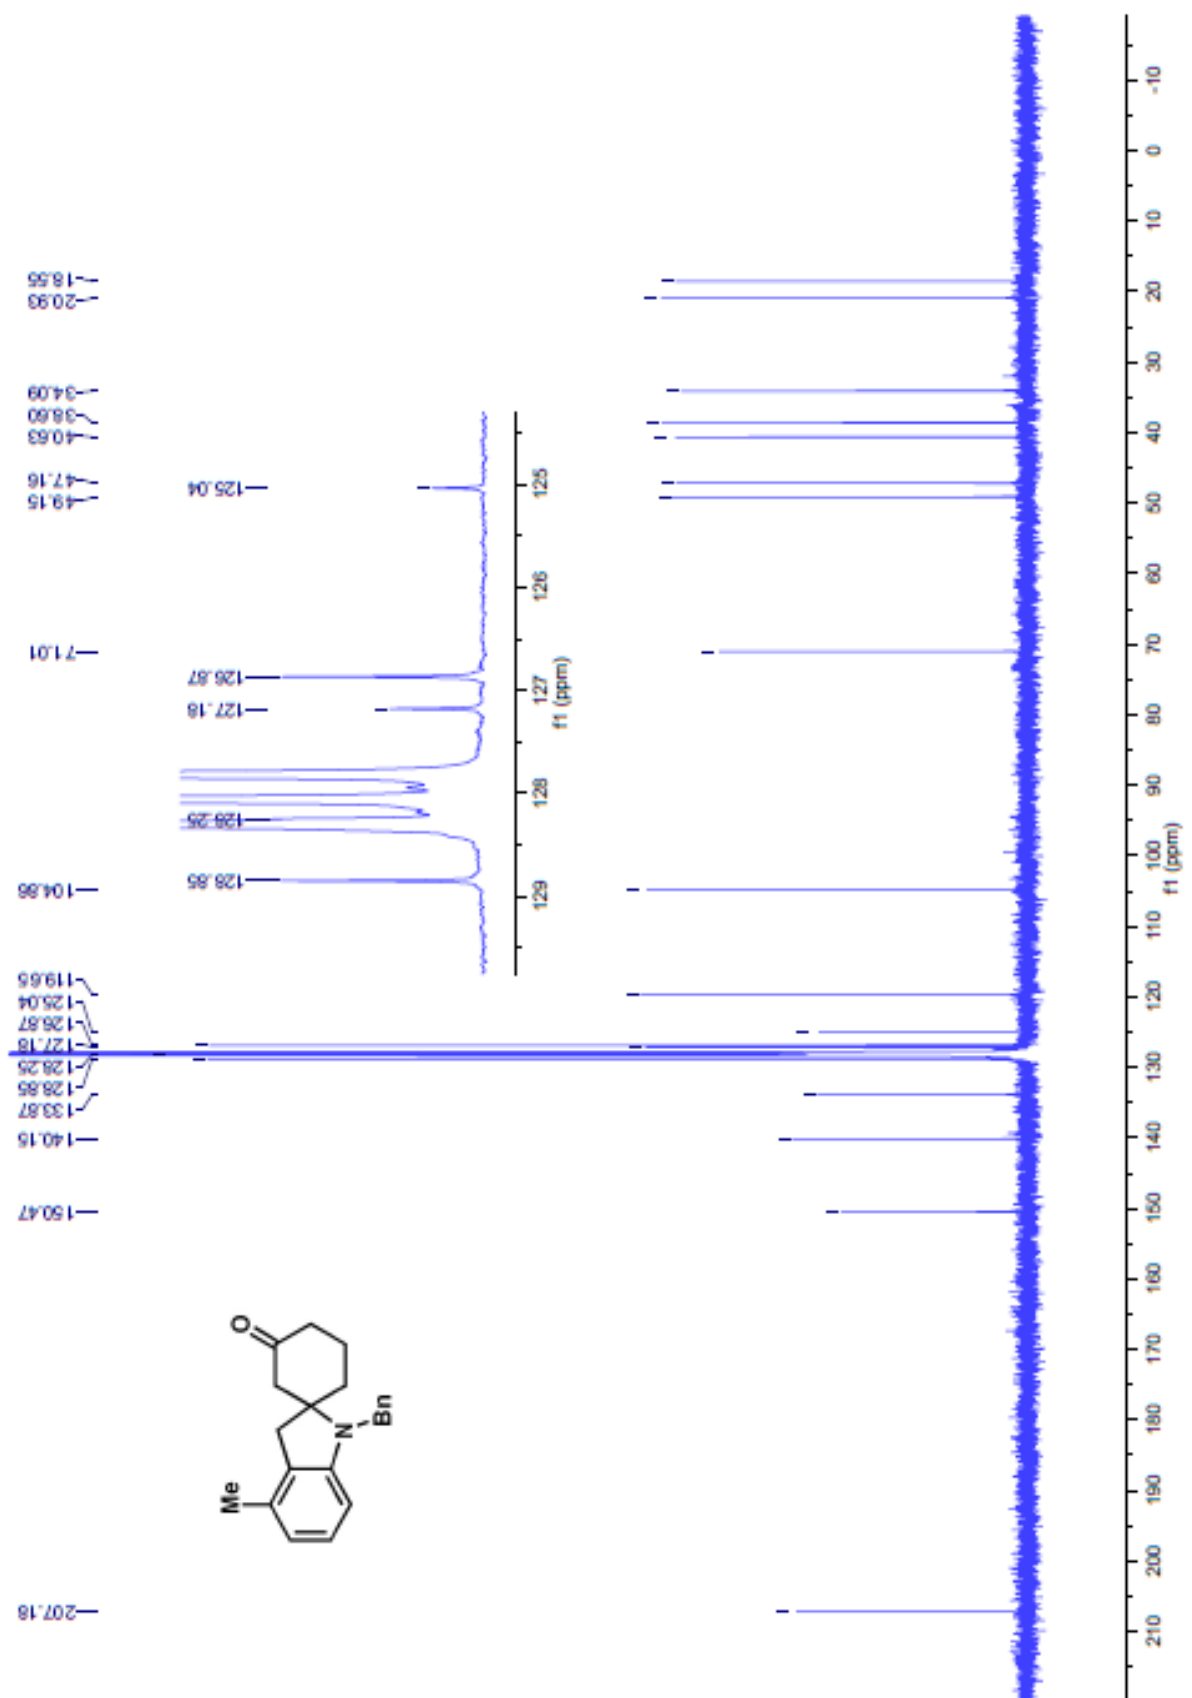

<sup>13</sup>C NMR (100 MHz, C<sub>6</sub>D<sub>6</sub>) of **3ba**

<sup>1</sup>H NMR (400 MHz, C<sub>6</sub>D<sub>6</sub>) of **3ca**

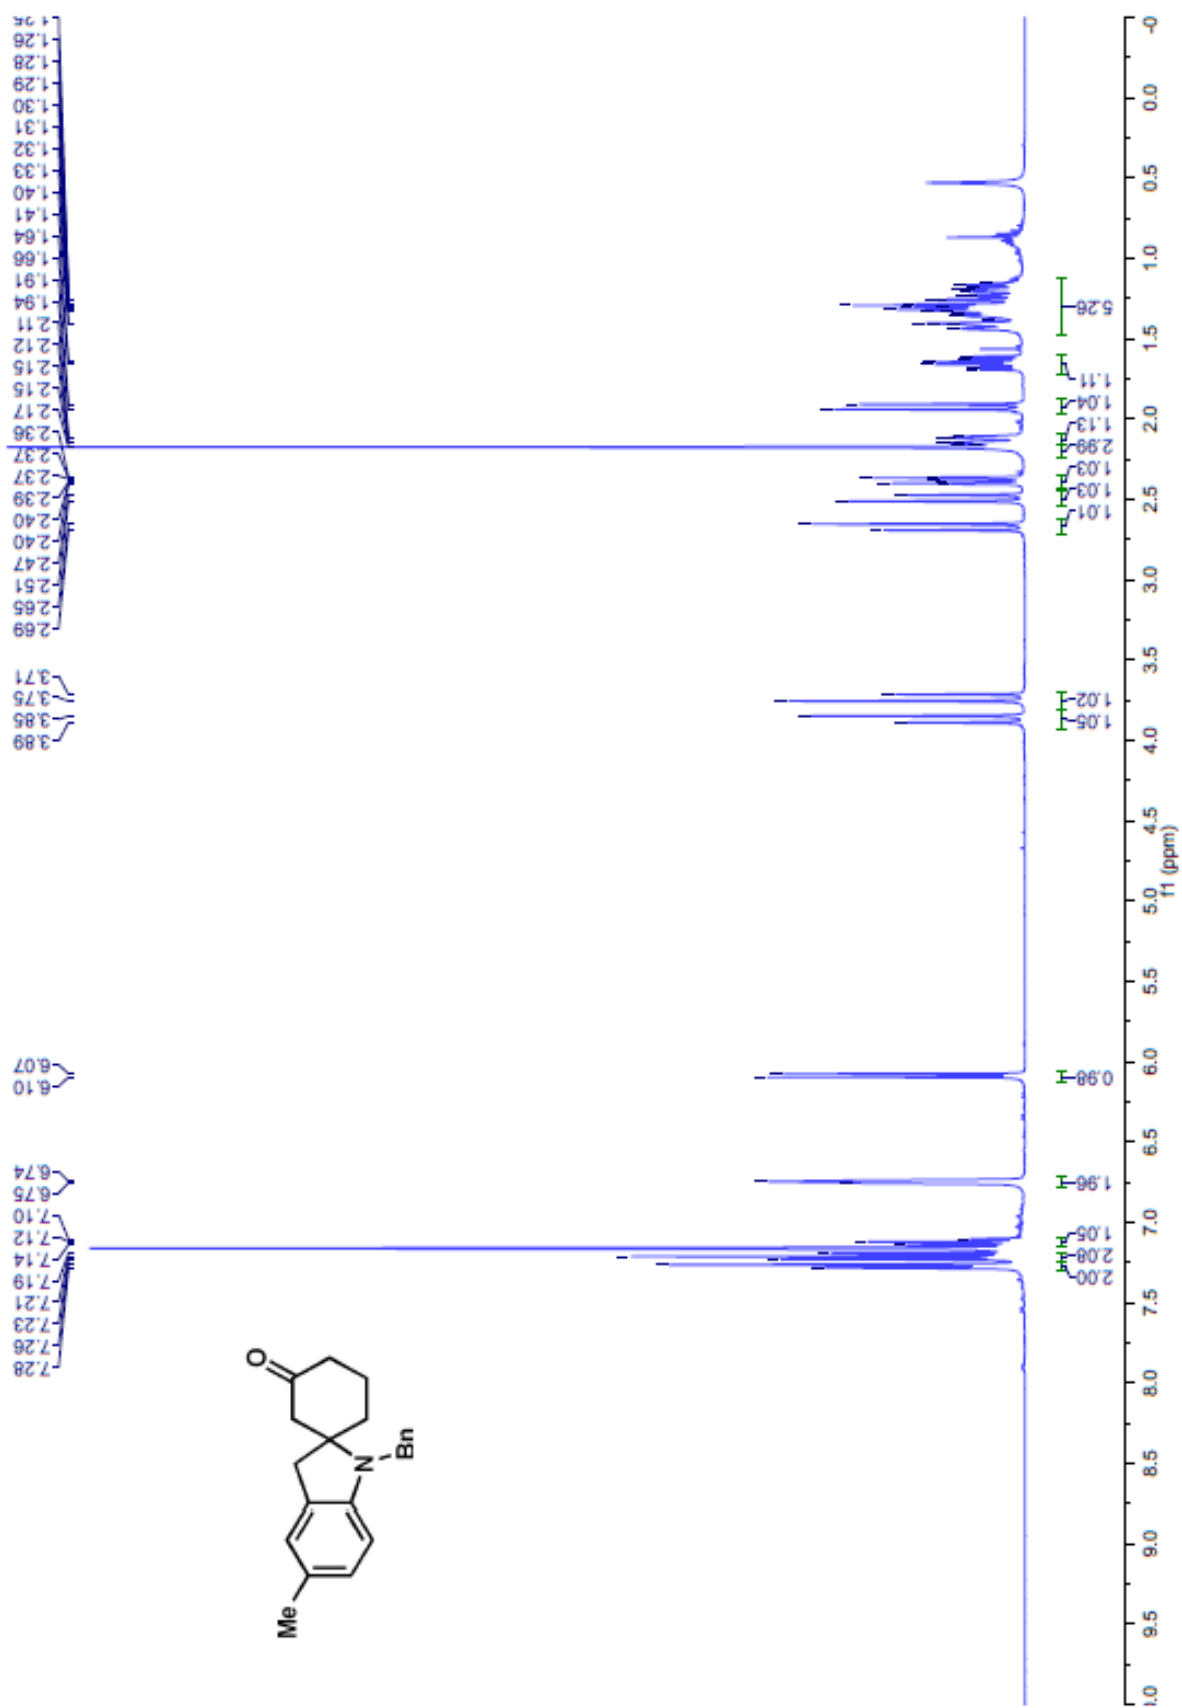

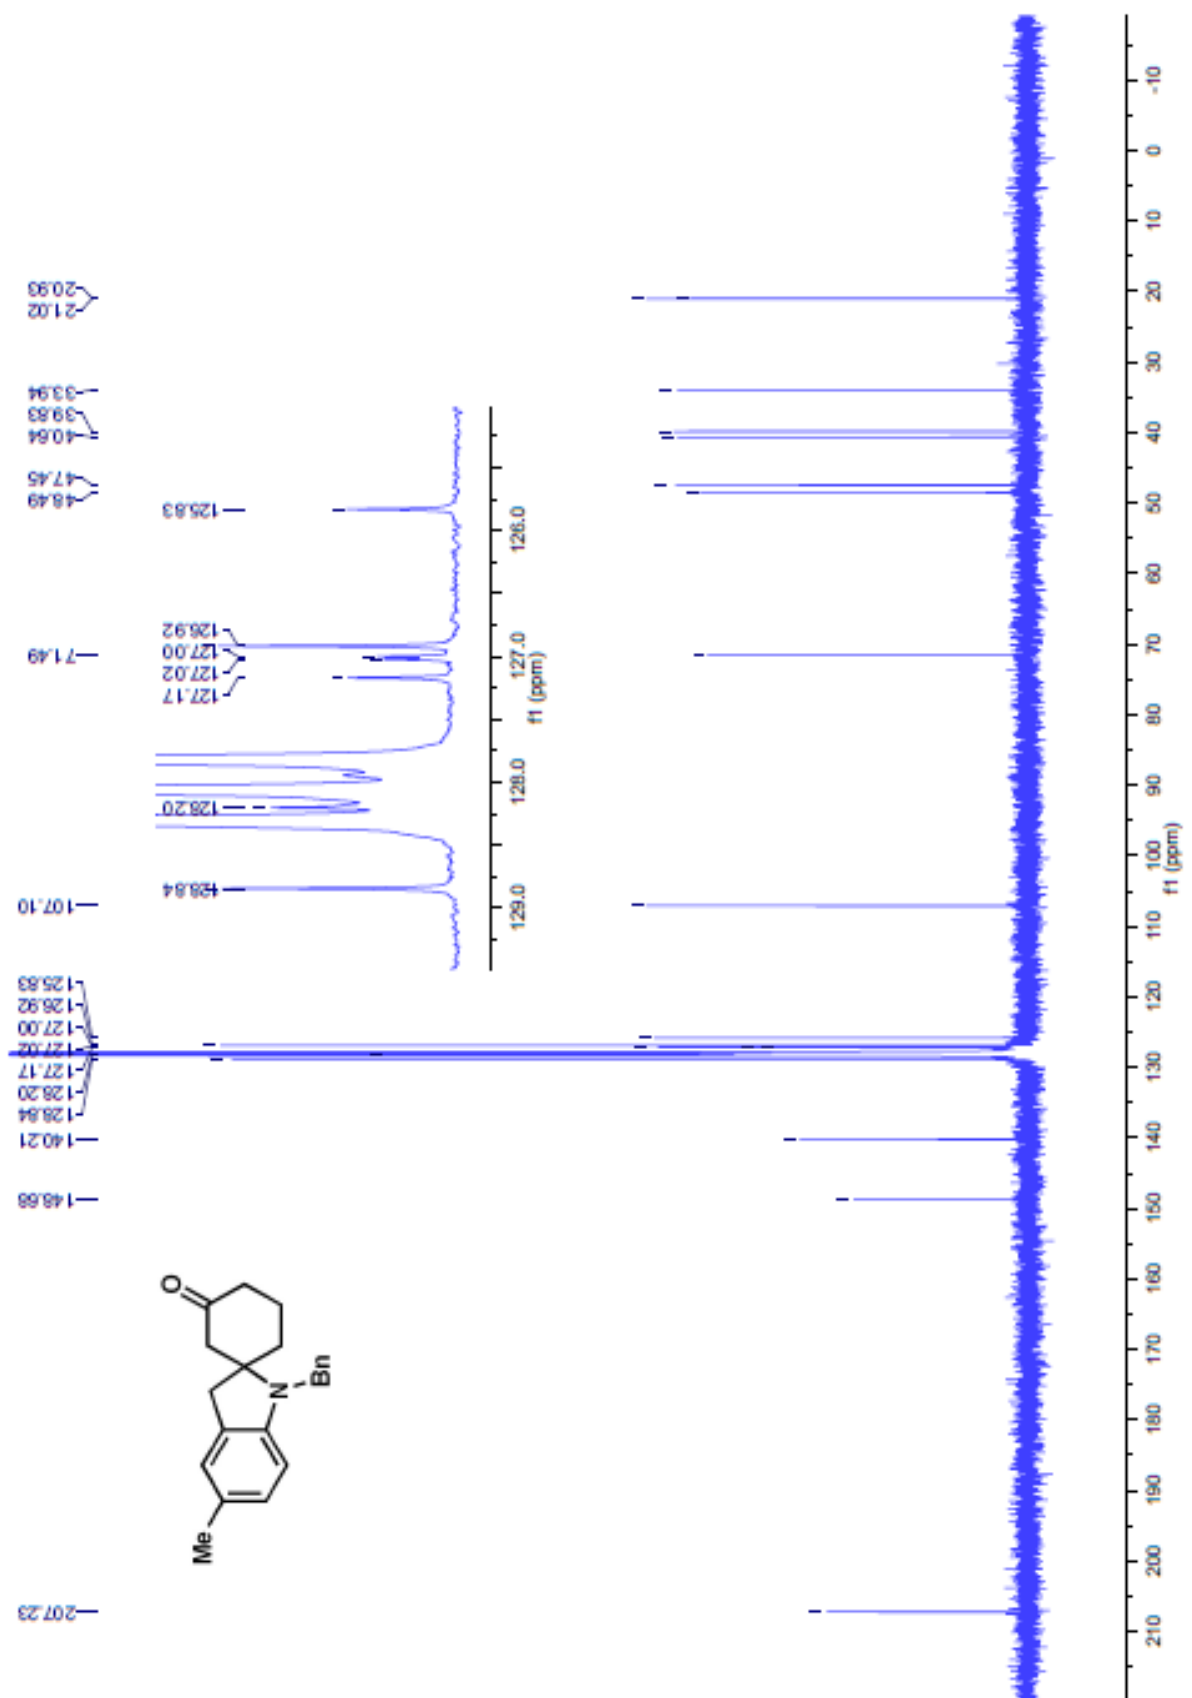

<sup>1</sup>H NMR (400 MHz, CDCl<sub>3</sub>) of **3da**

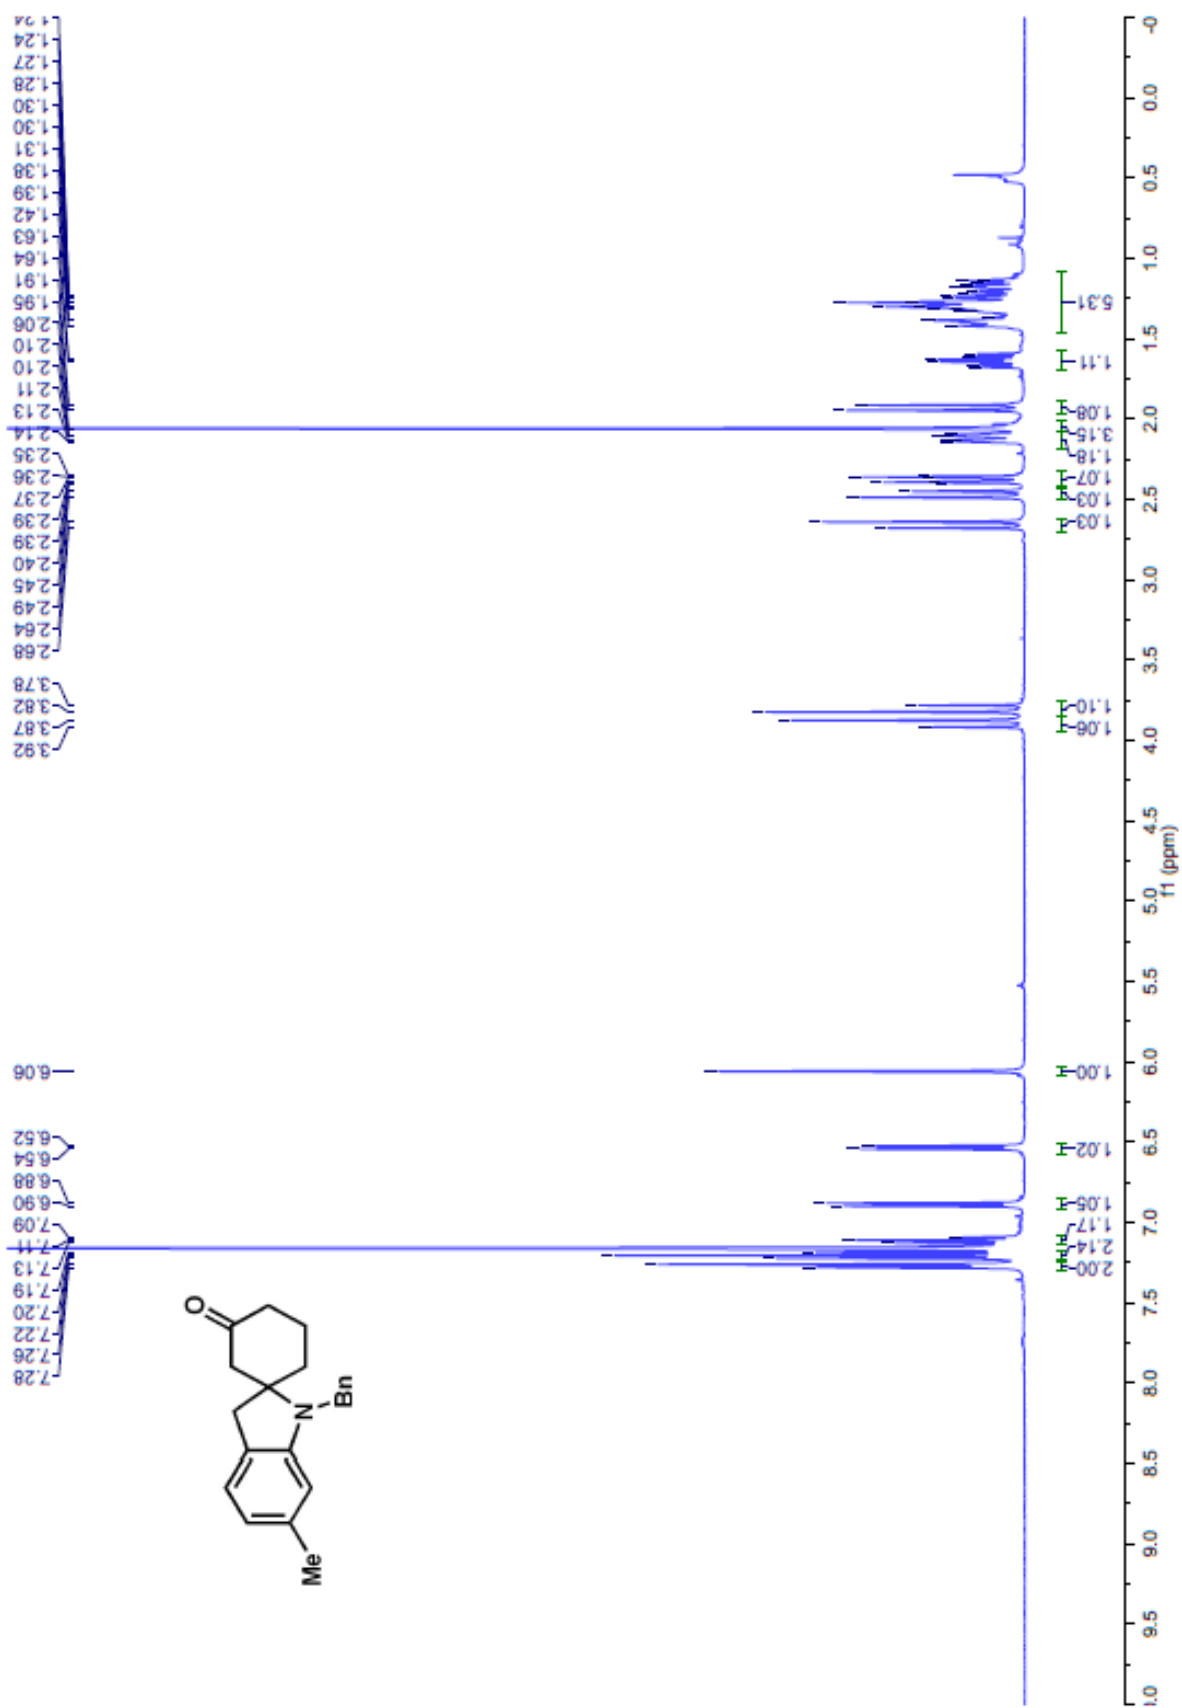



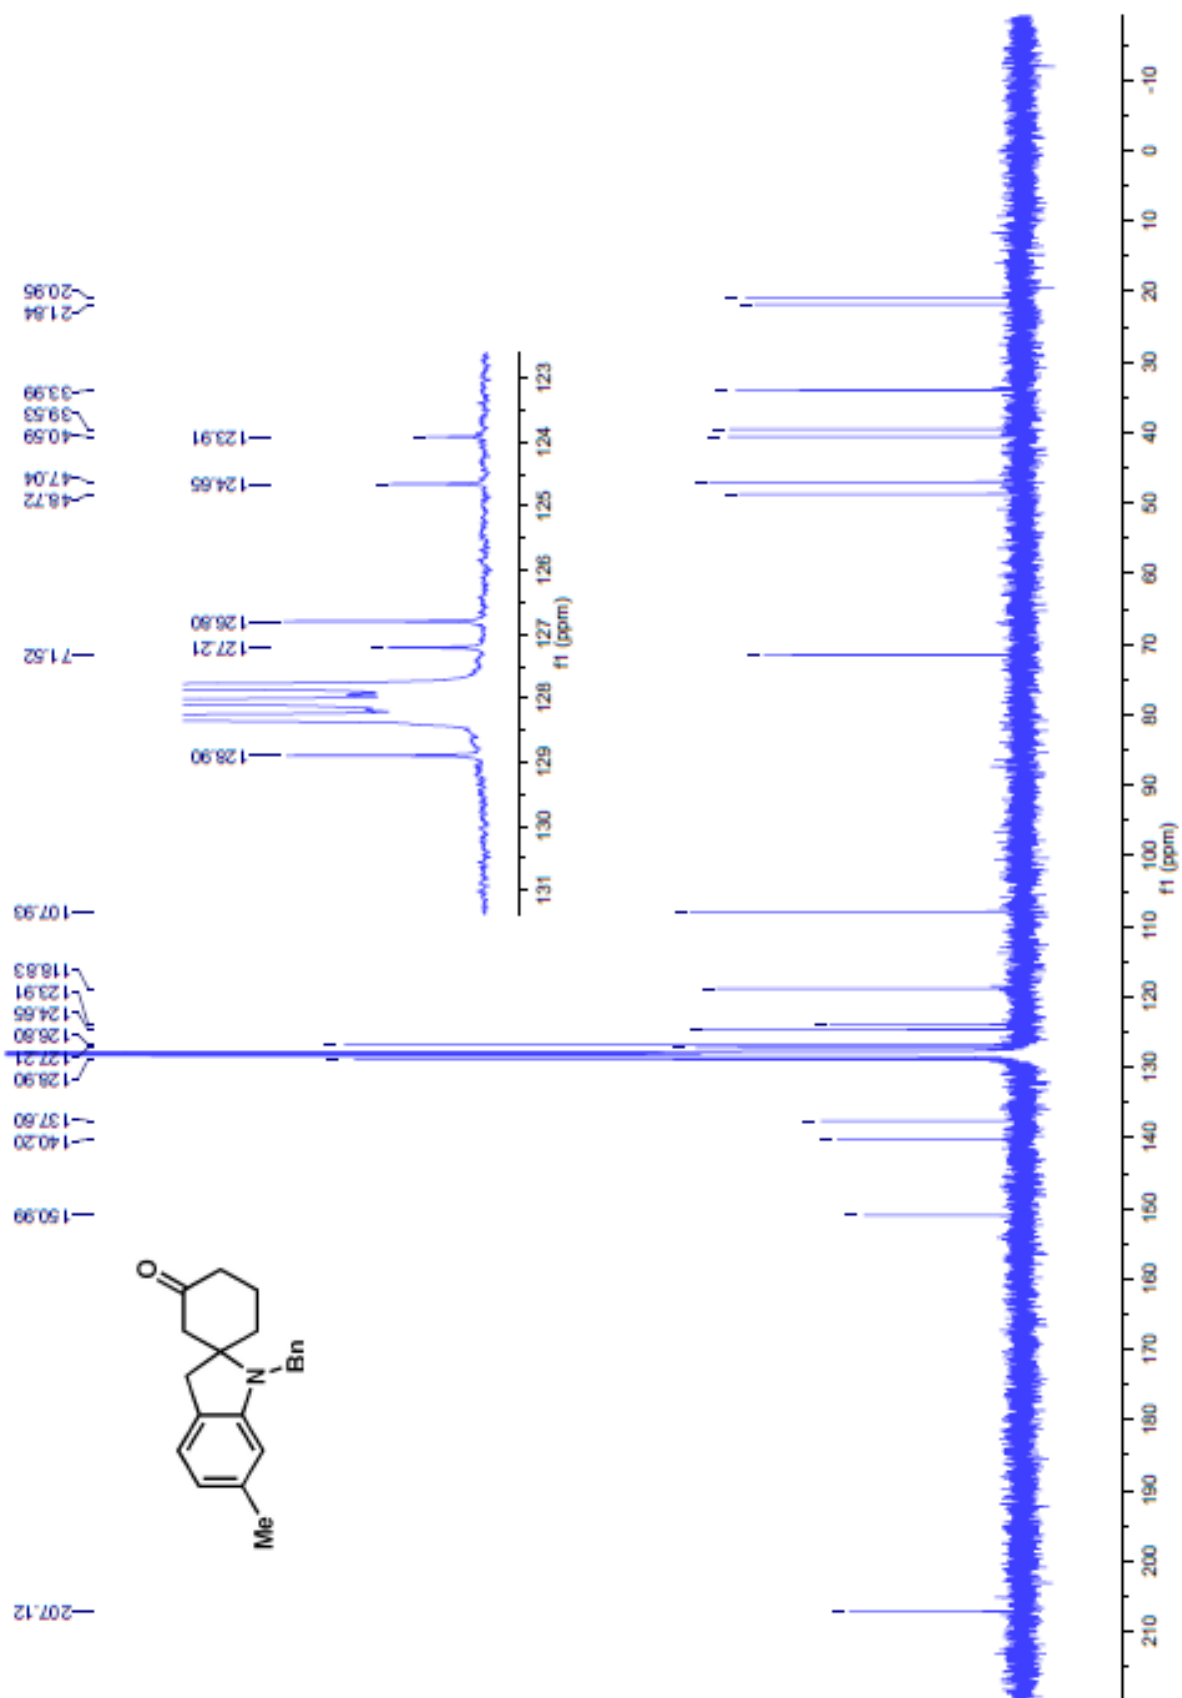



$^{13}\text{C}$  NMR (100 MHz,  $\text{C}_6\text{D}_6$ ) of **3ea**

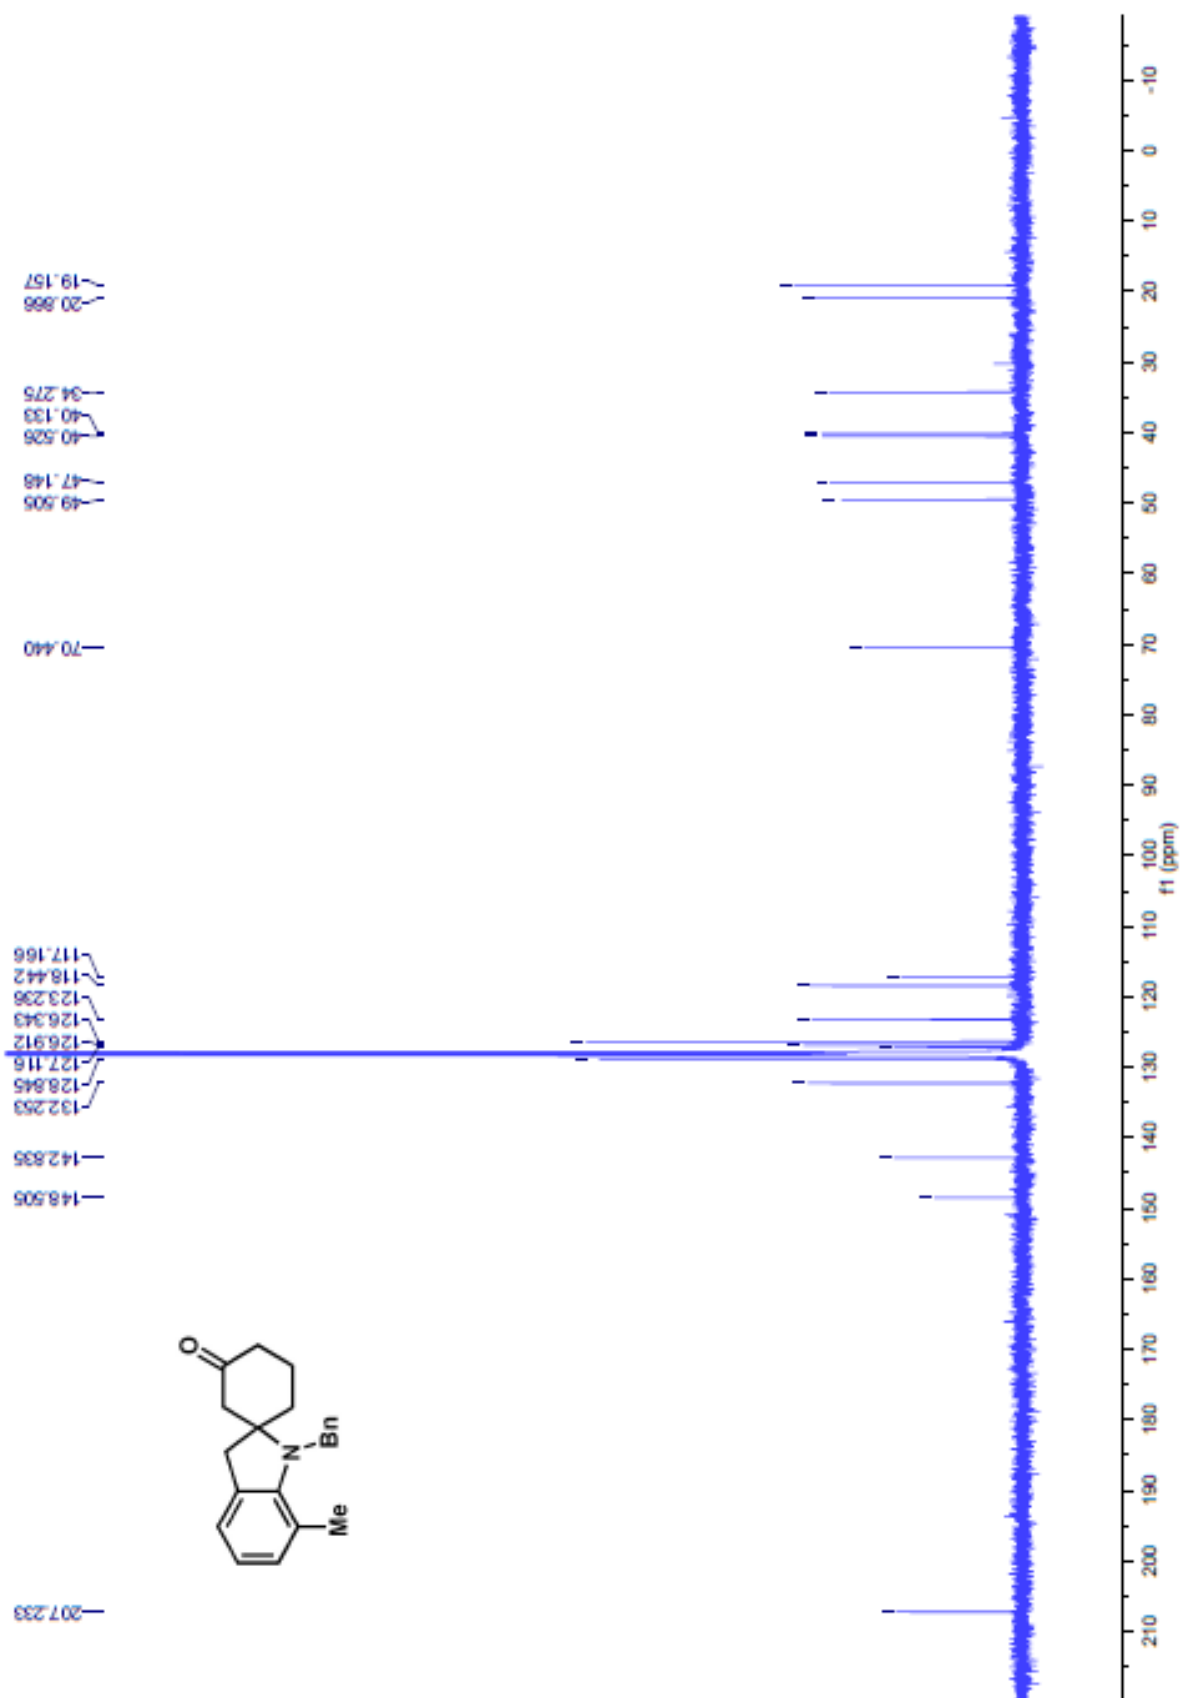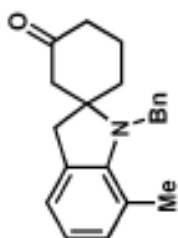

<sup>1</sup>H NMR (400 MHz, C<sub>6</sub>D<sub>6</sub>) of **3fa**

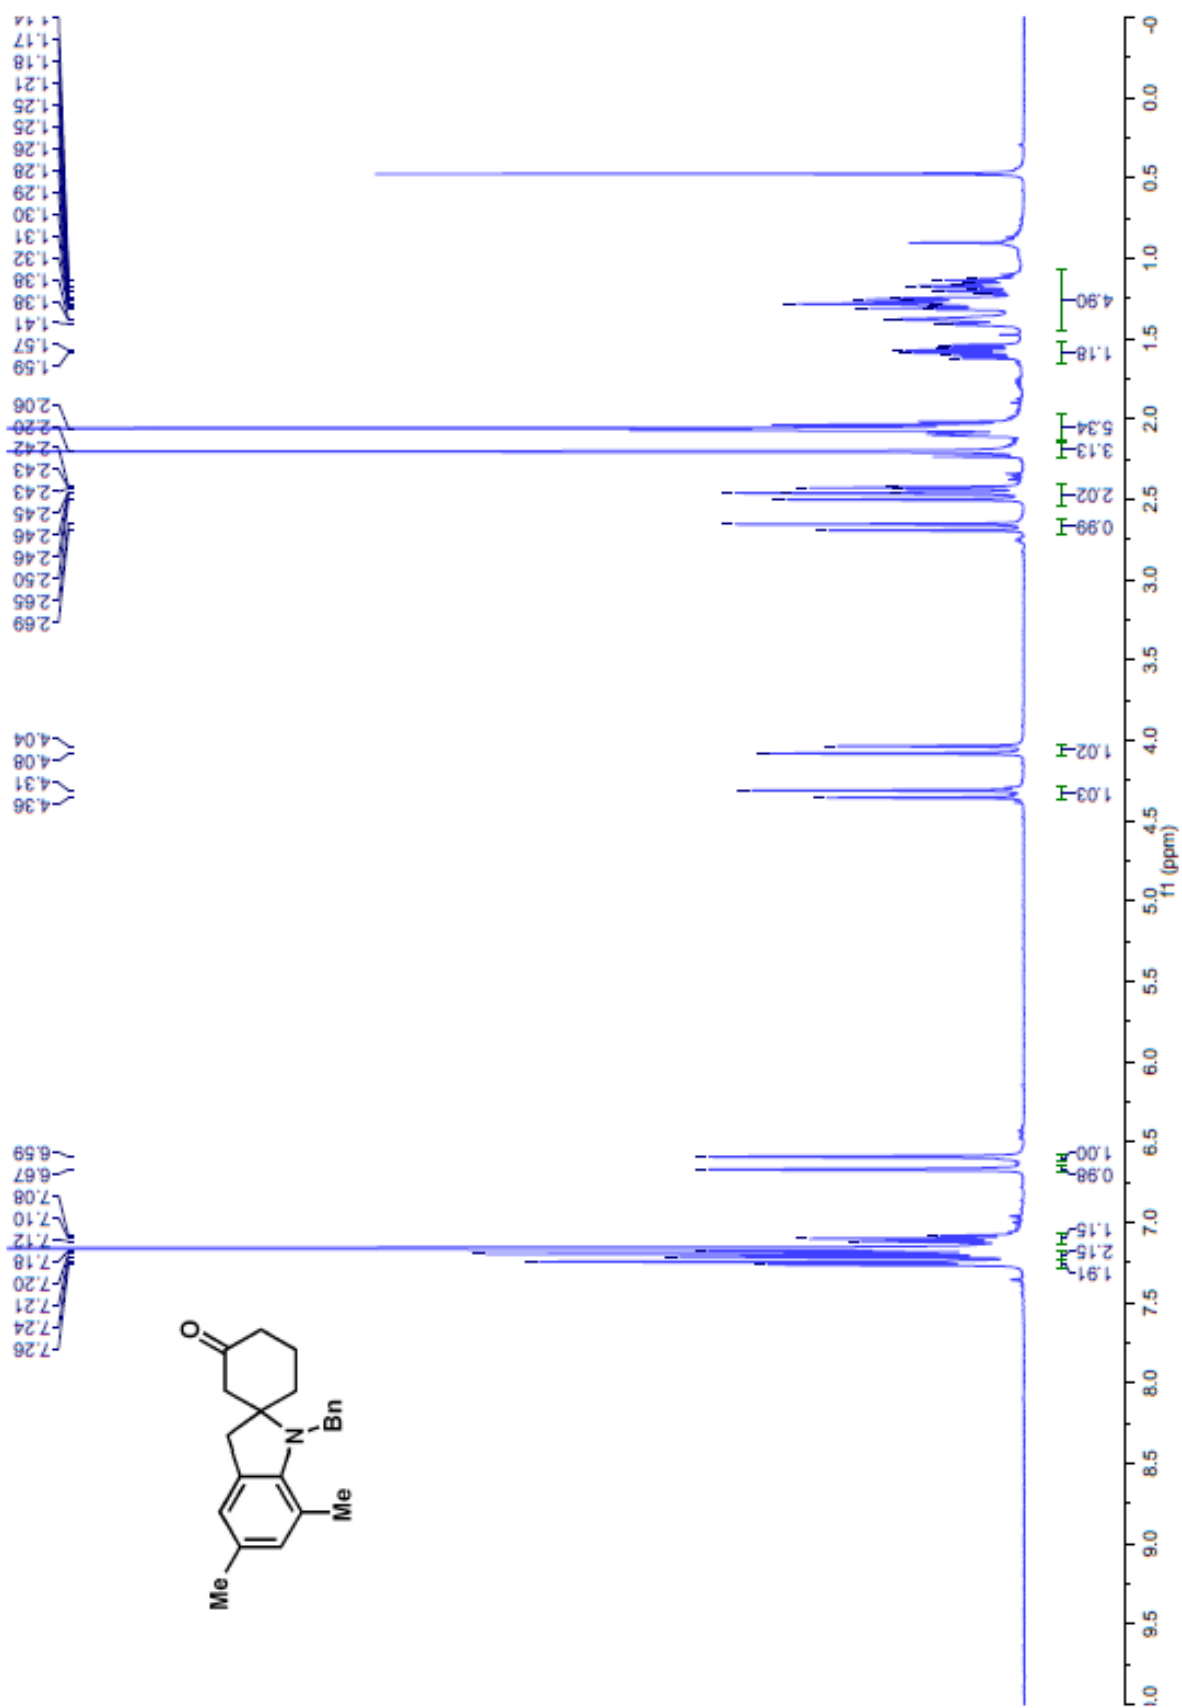

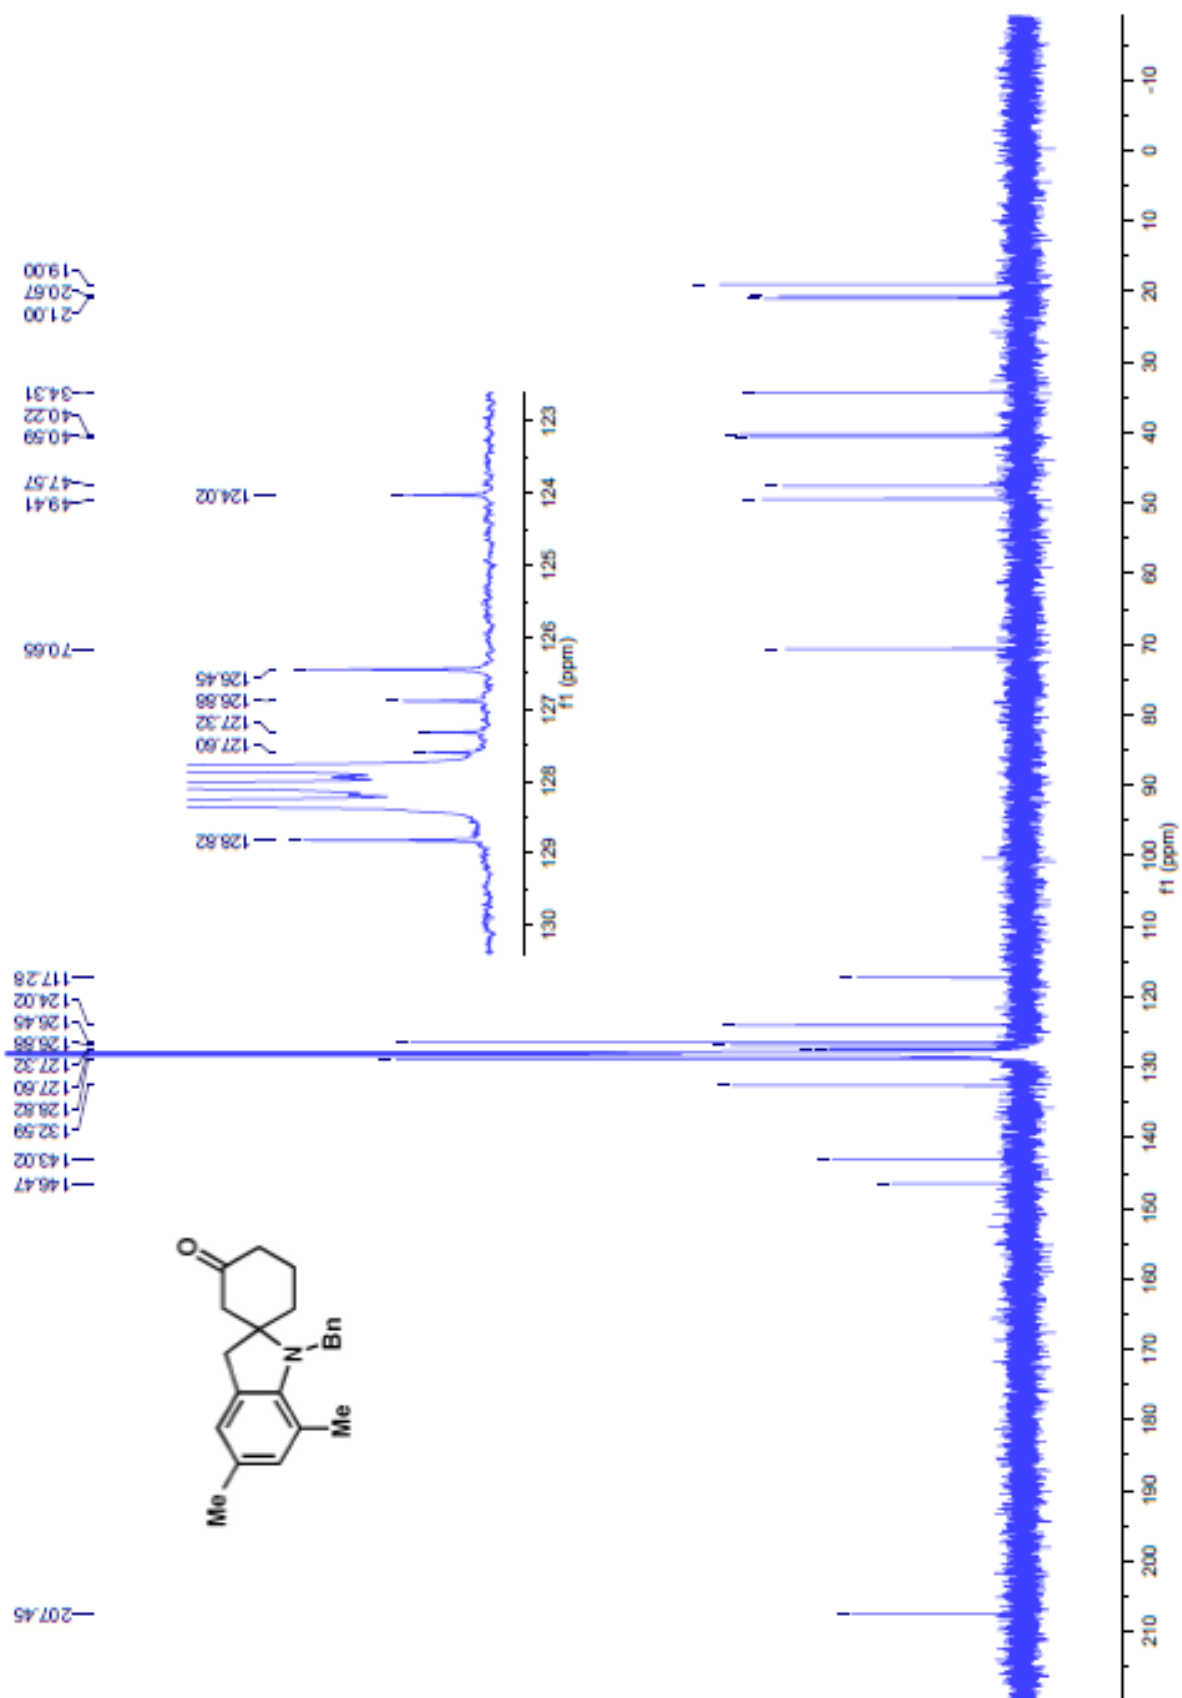

$^{13}\text{C}$  NMR (100 MHz,  $\text{C}_6\text{D}_6$ ) of **3fa**



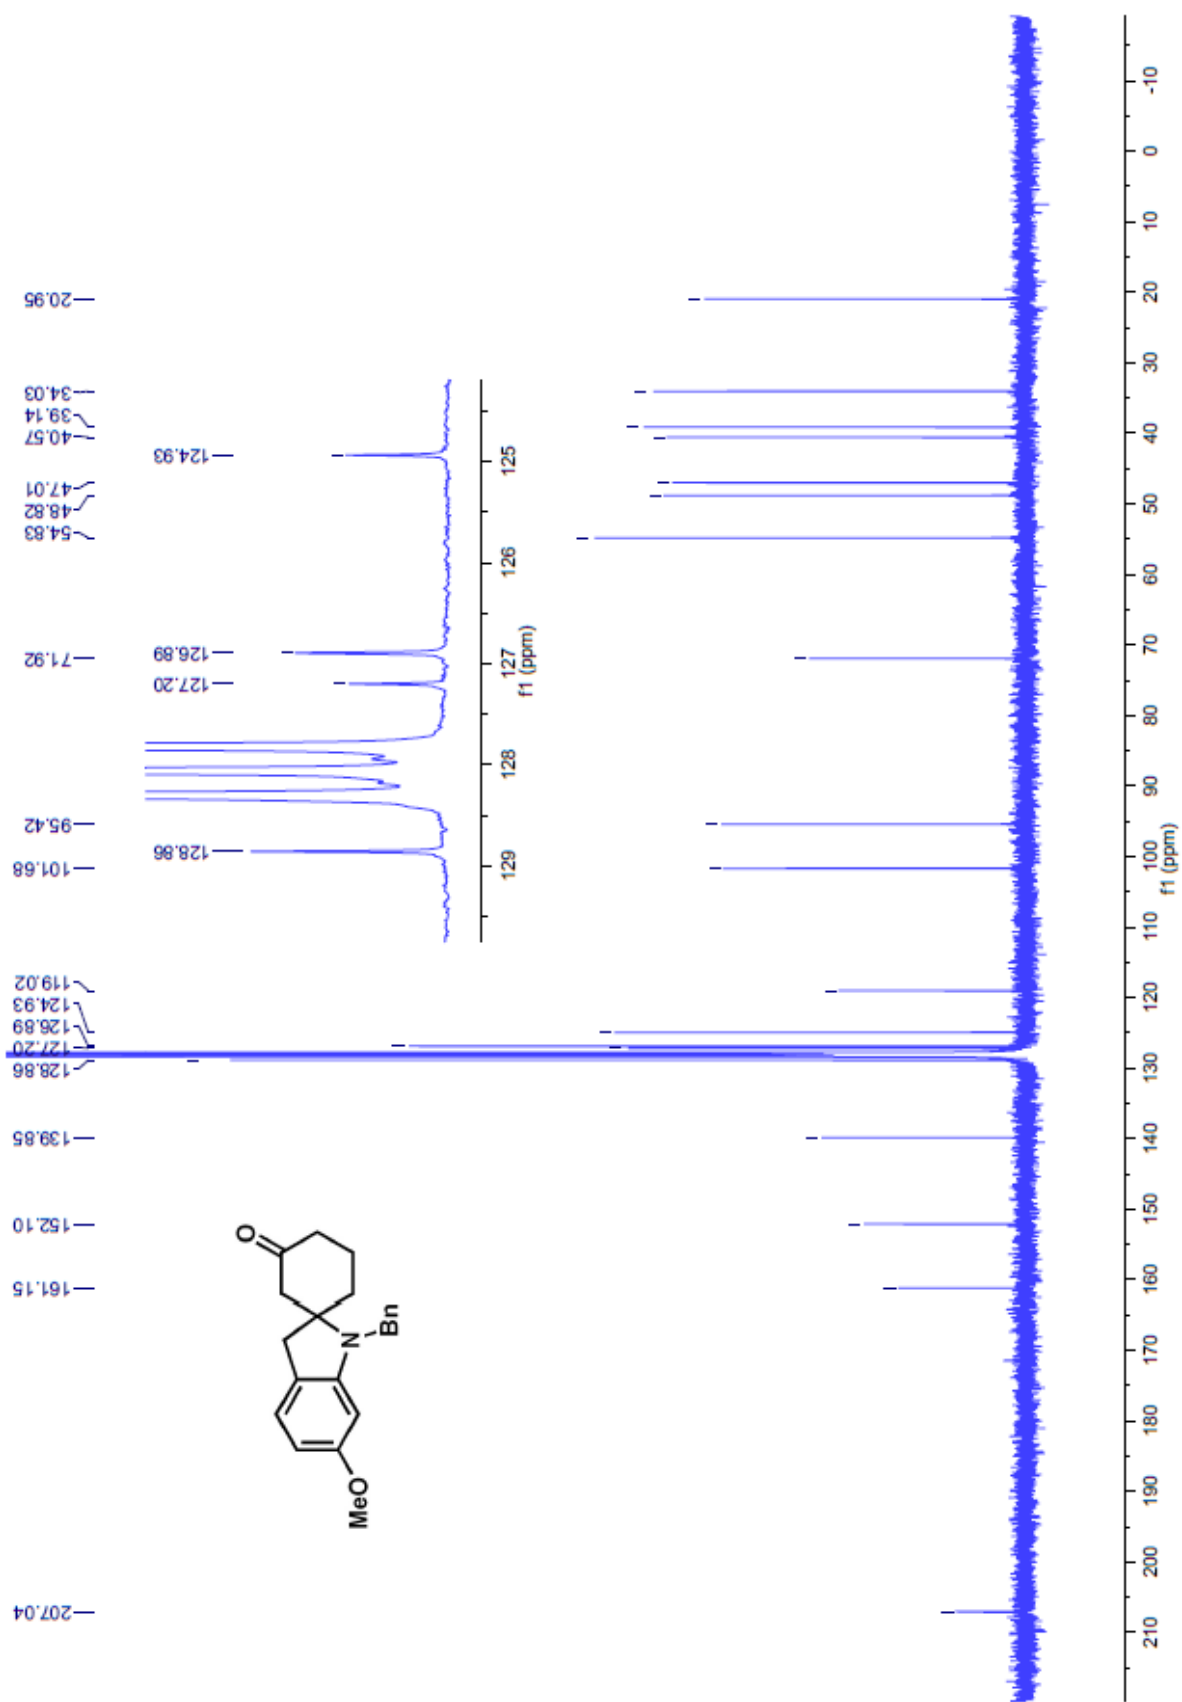

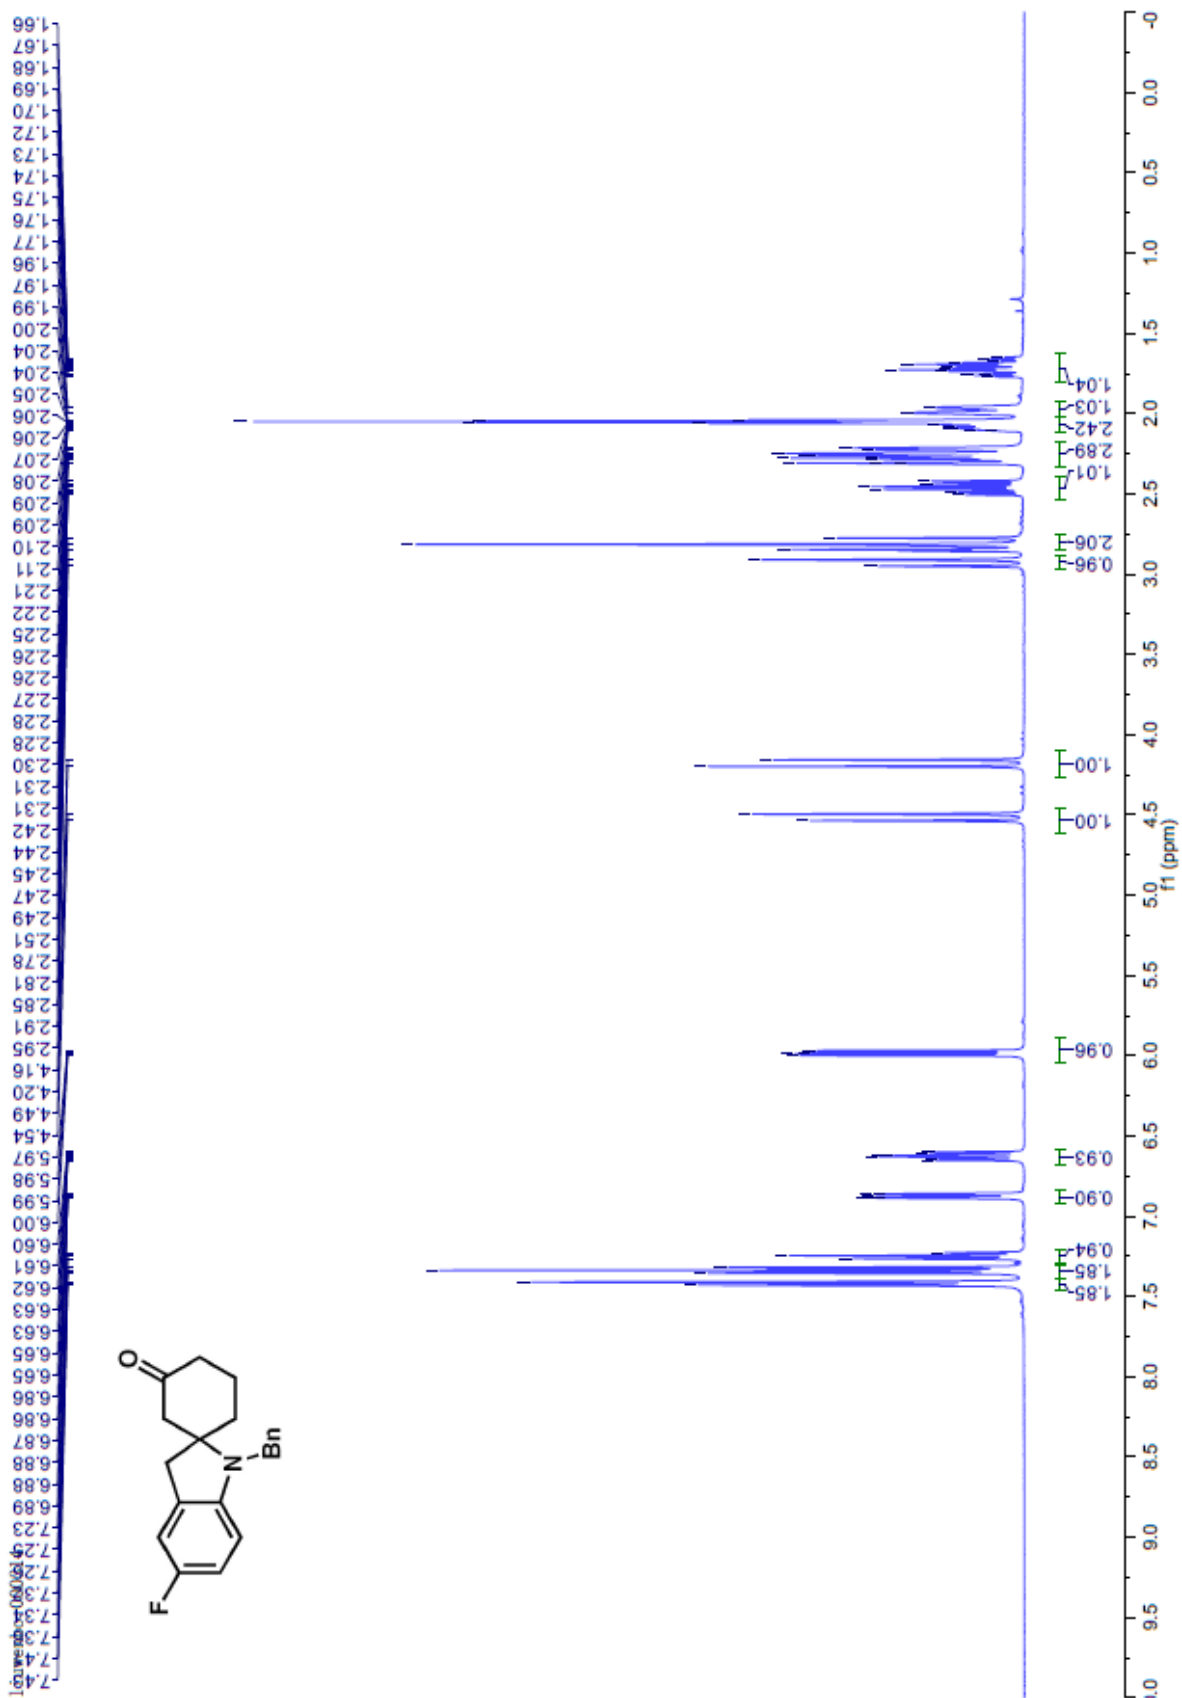



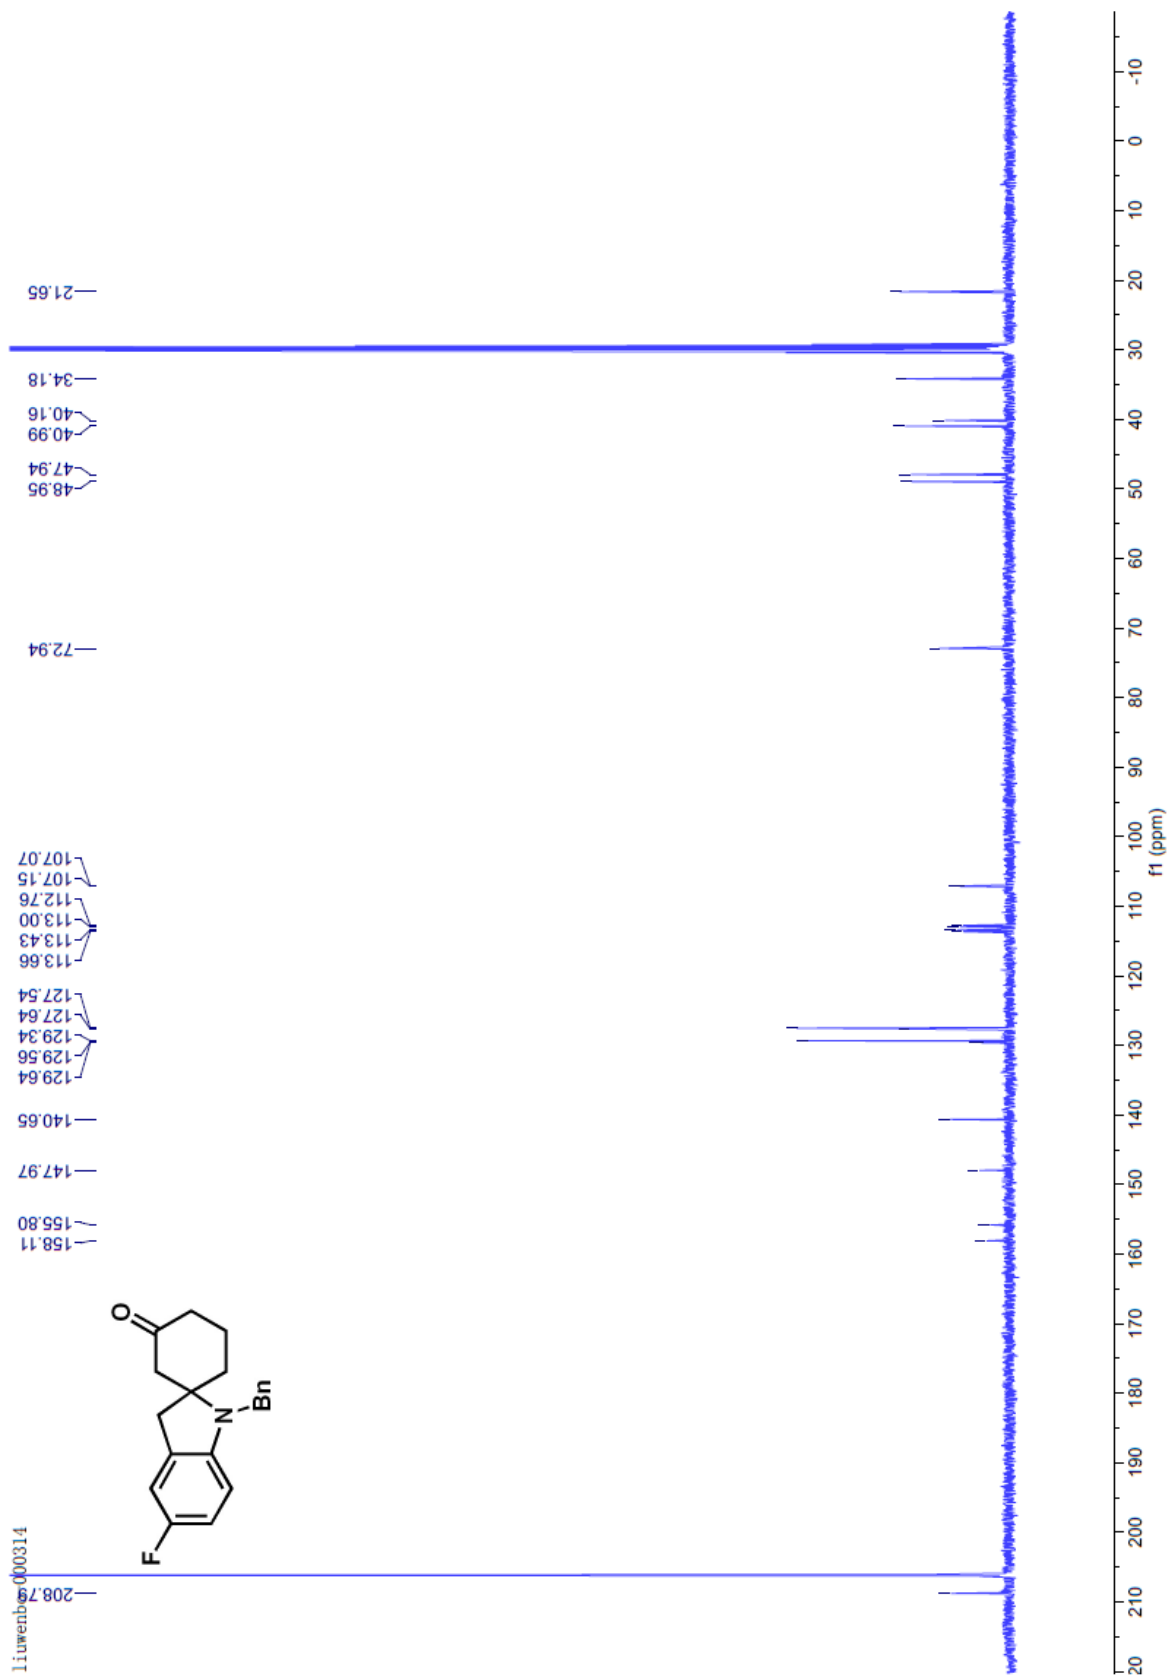

liuwenbo-000314

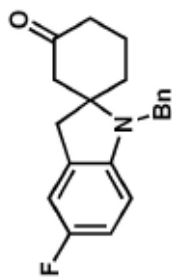

— -129.54

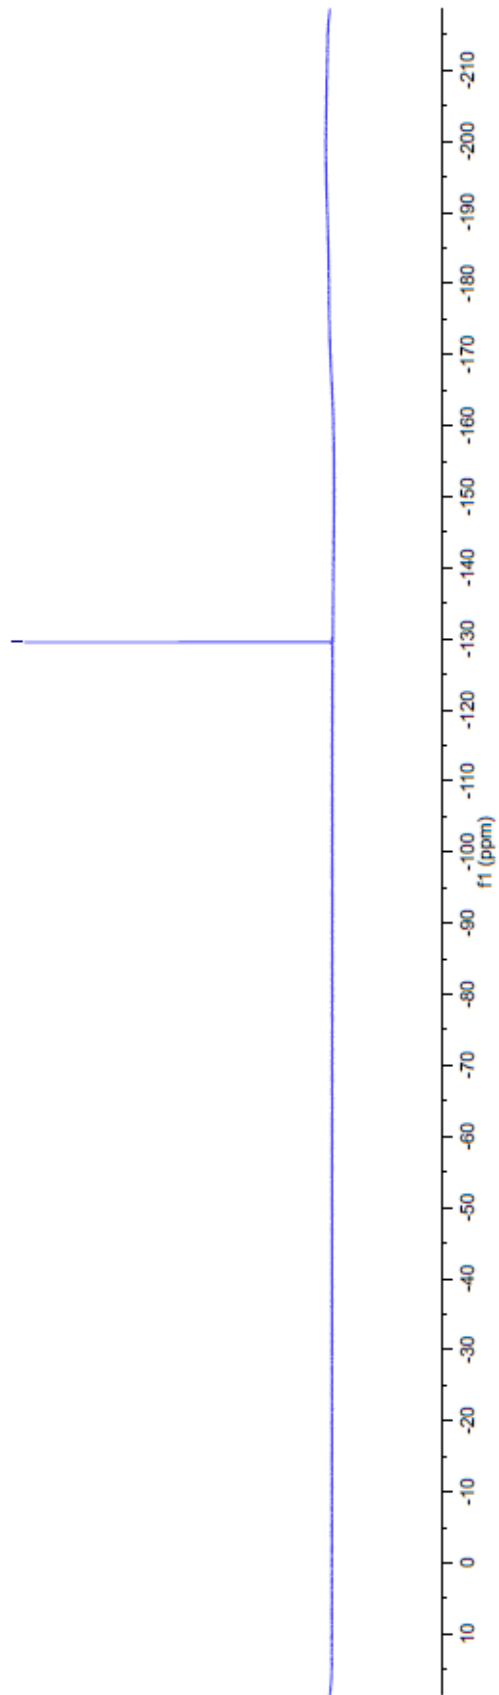

$^{19}\text{F}$  NMR (376 MHz, acetone- $d_6$ ) of **3hu**

<sup>1</sup>H NMR (400 MHz, C<sub>6</sub>D<sub>6</sub>) of **3ia**

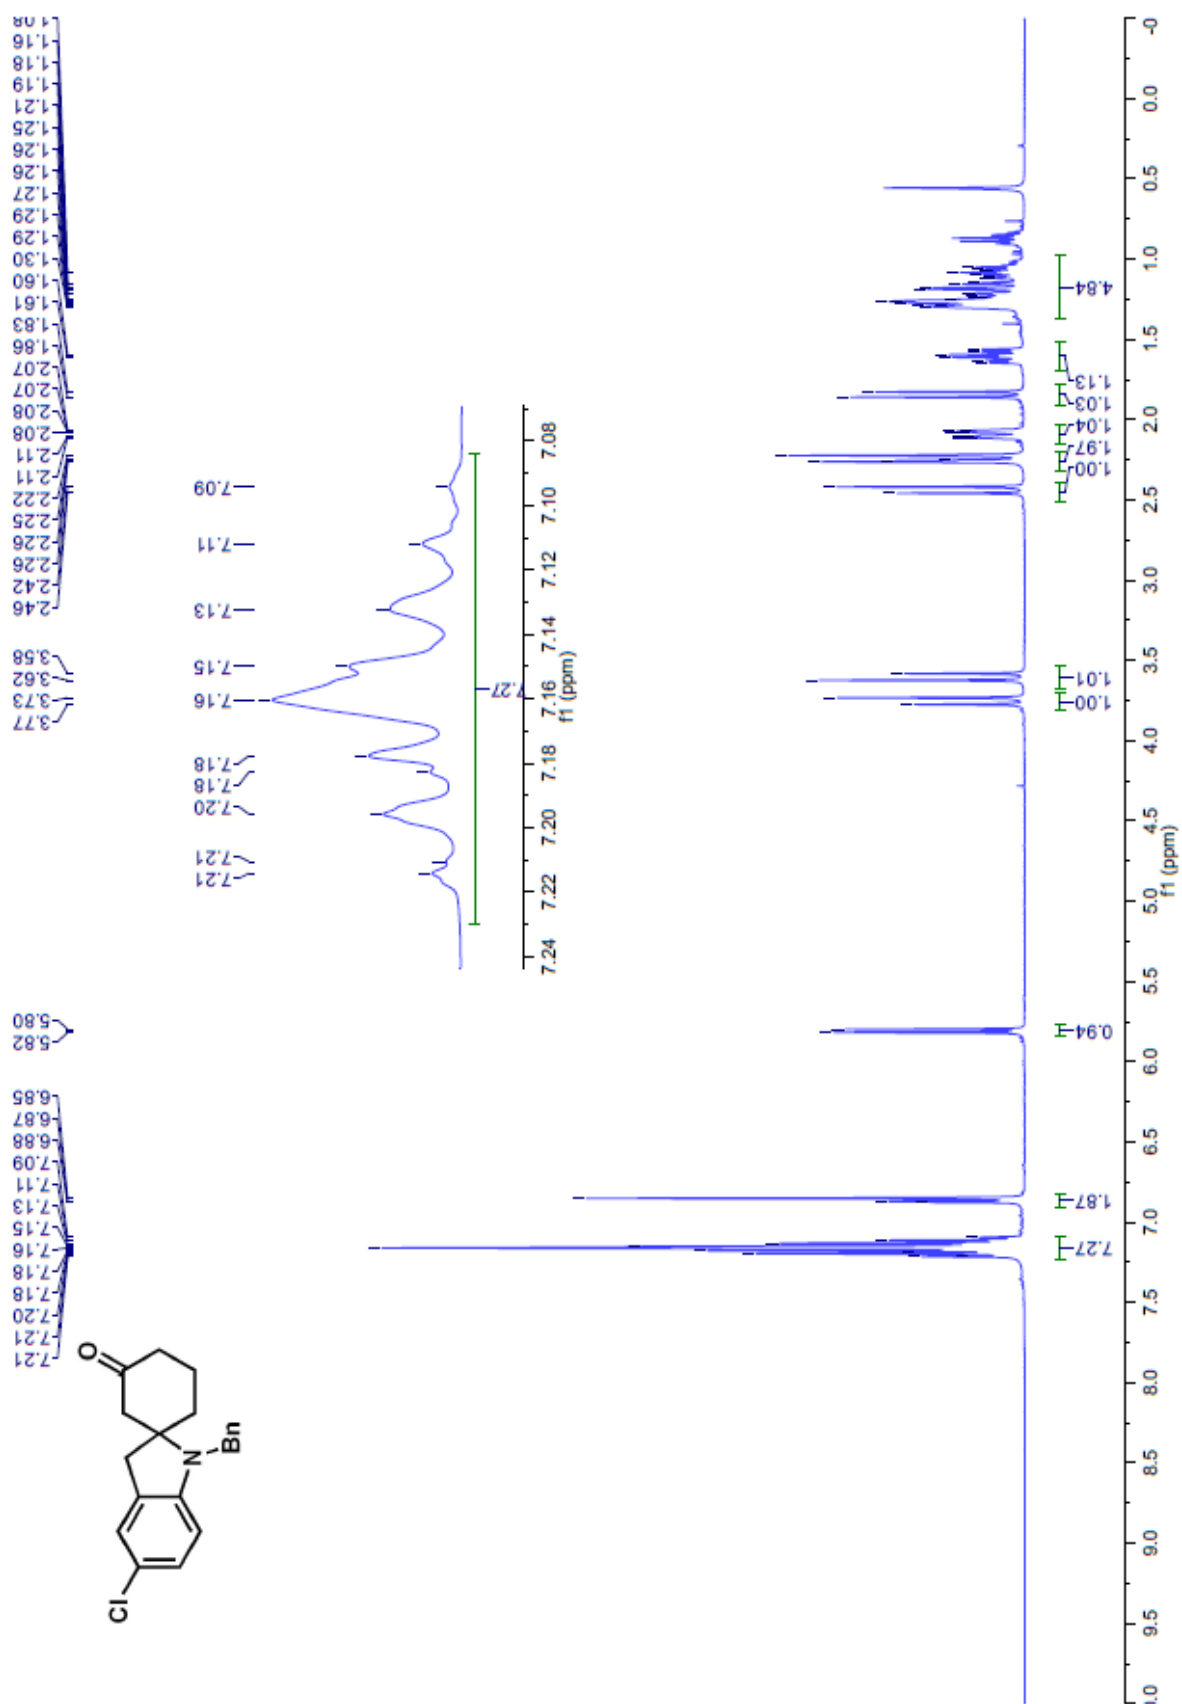

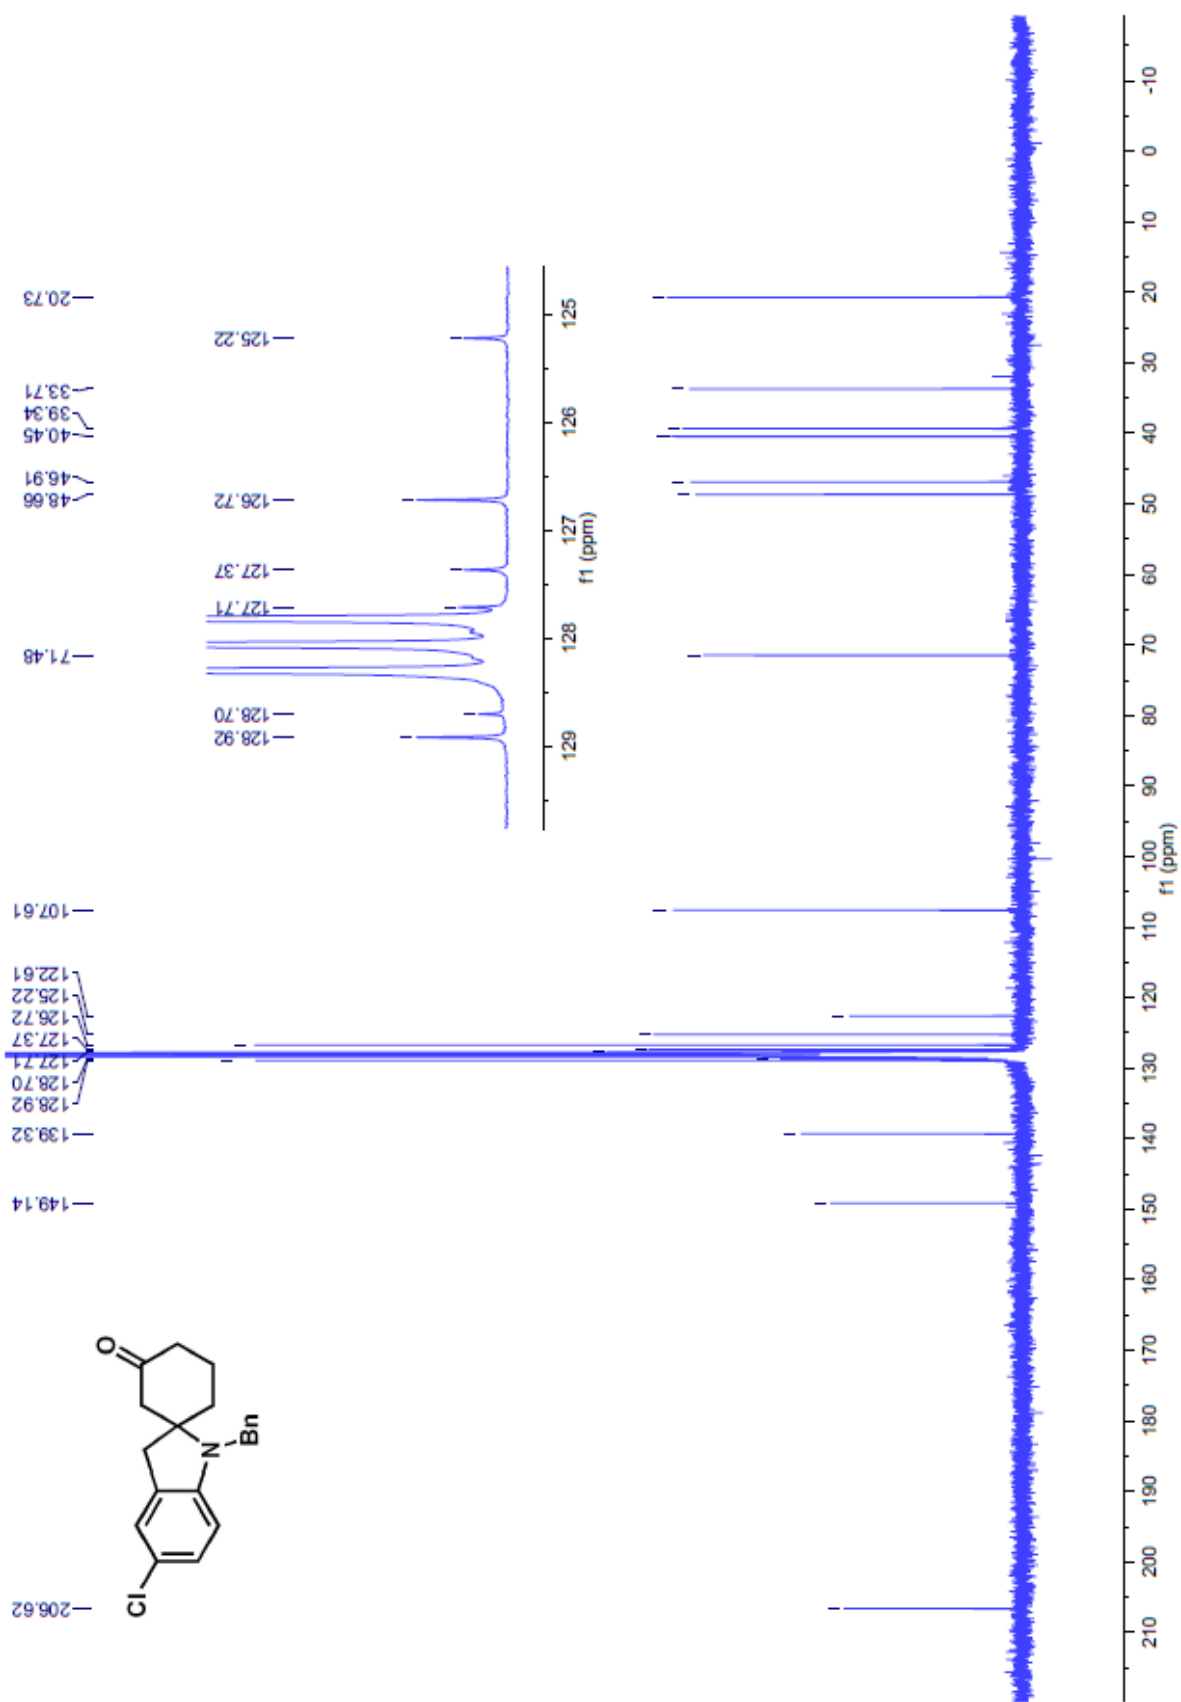

<sup>13</sup>C NMR (100 MHz, C<sub>6</sub>D<sub>6</sub>) of **3ia**

<sup>1</sup>H NMR (400 MHz, C<sub>6</sub>D<sub>6</sub>) of **3ja**

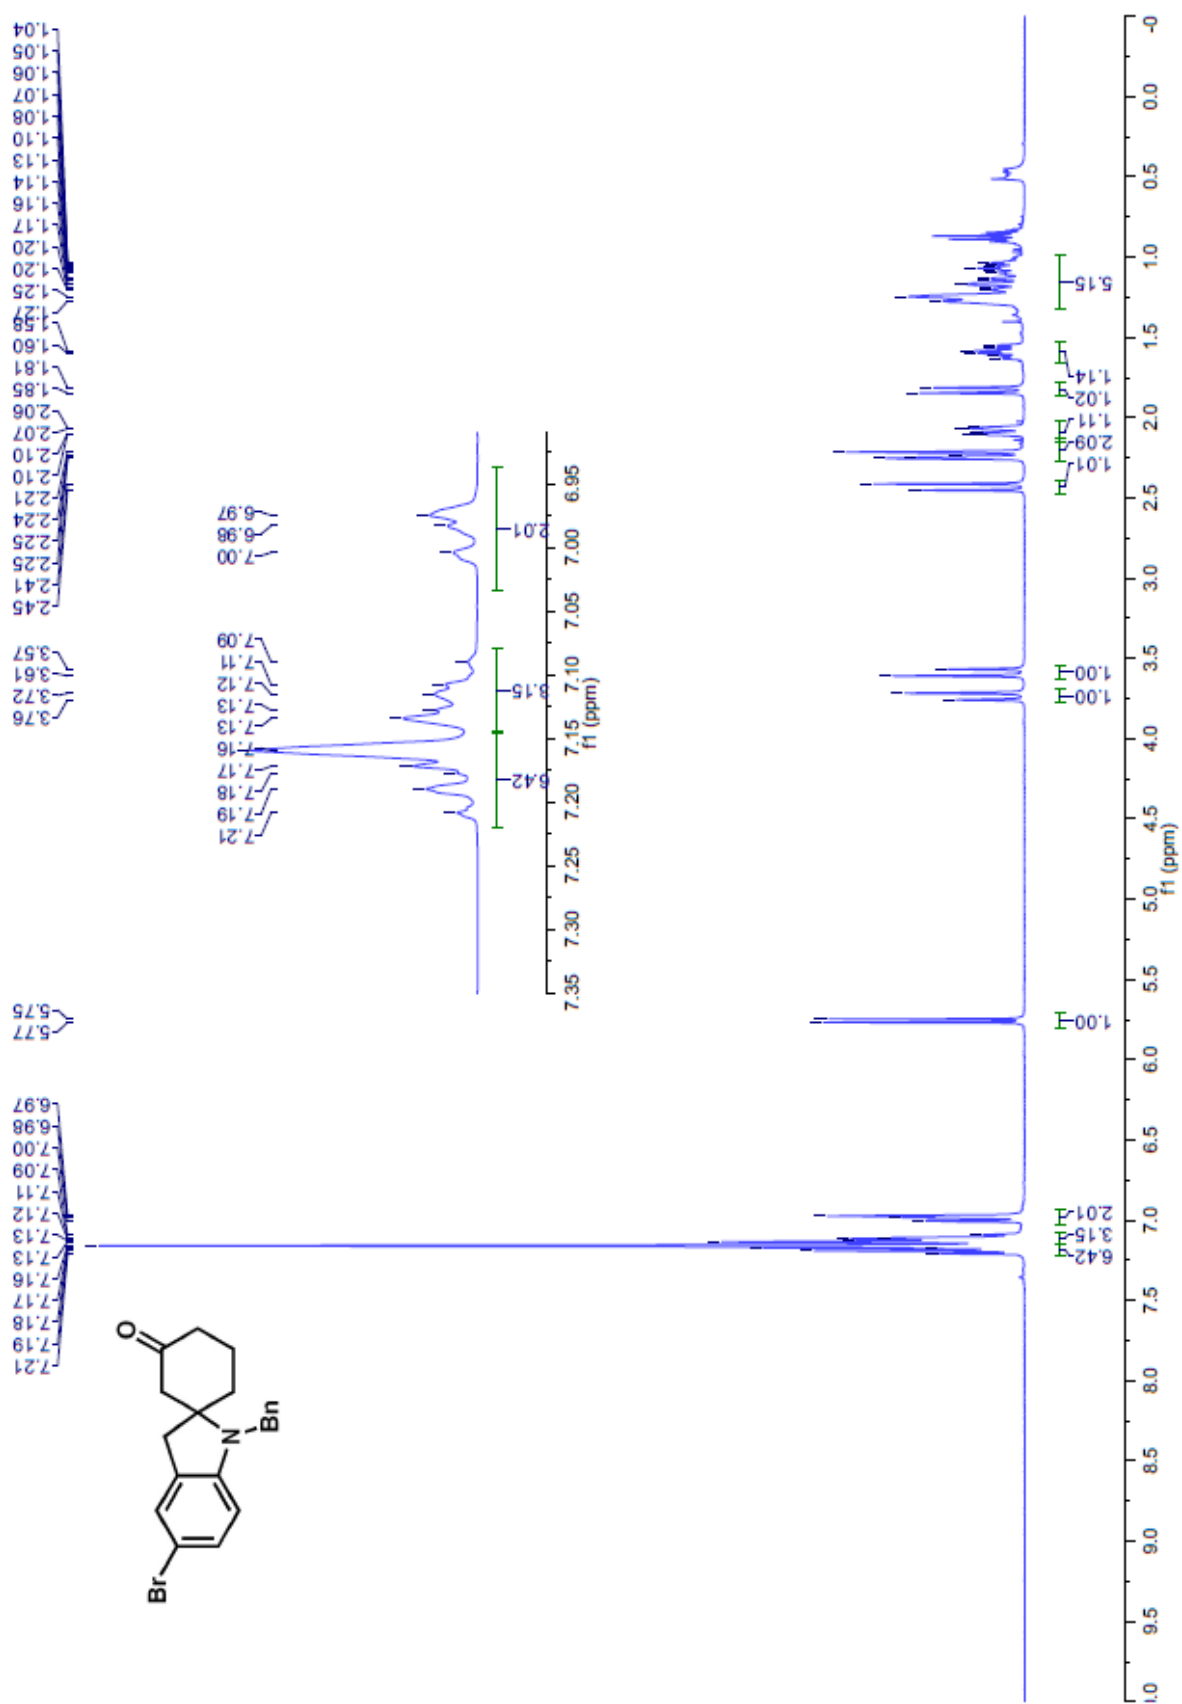

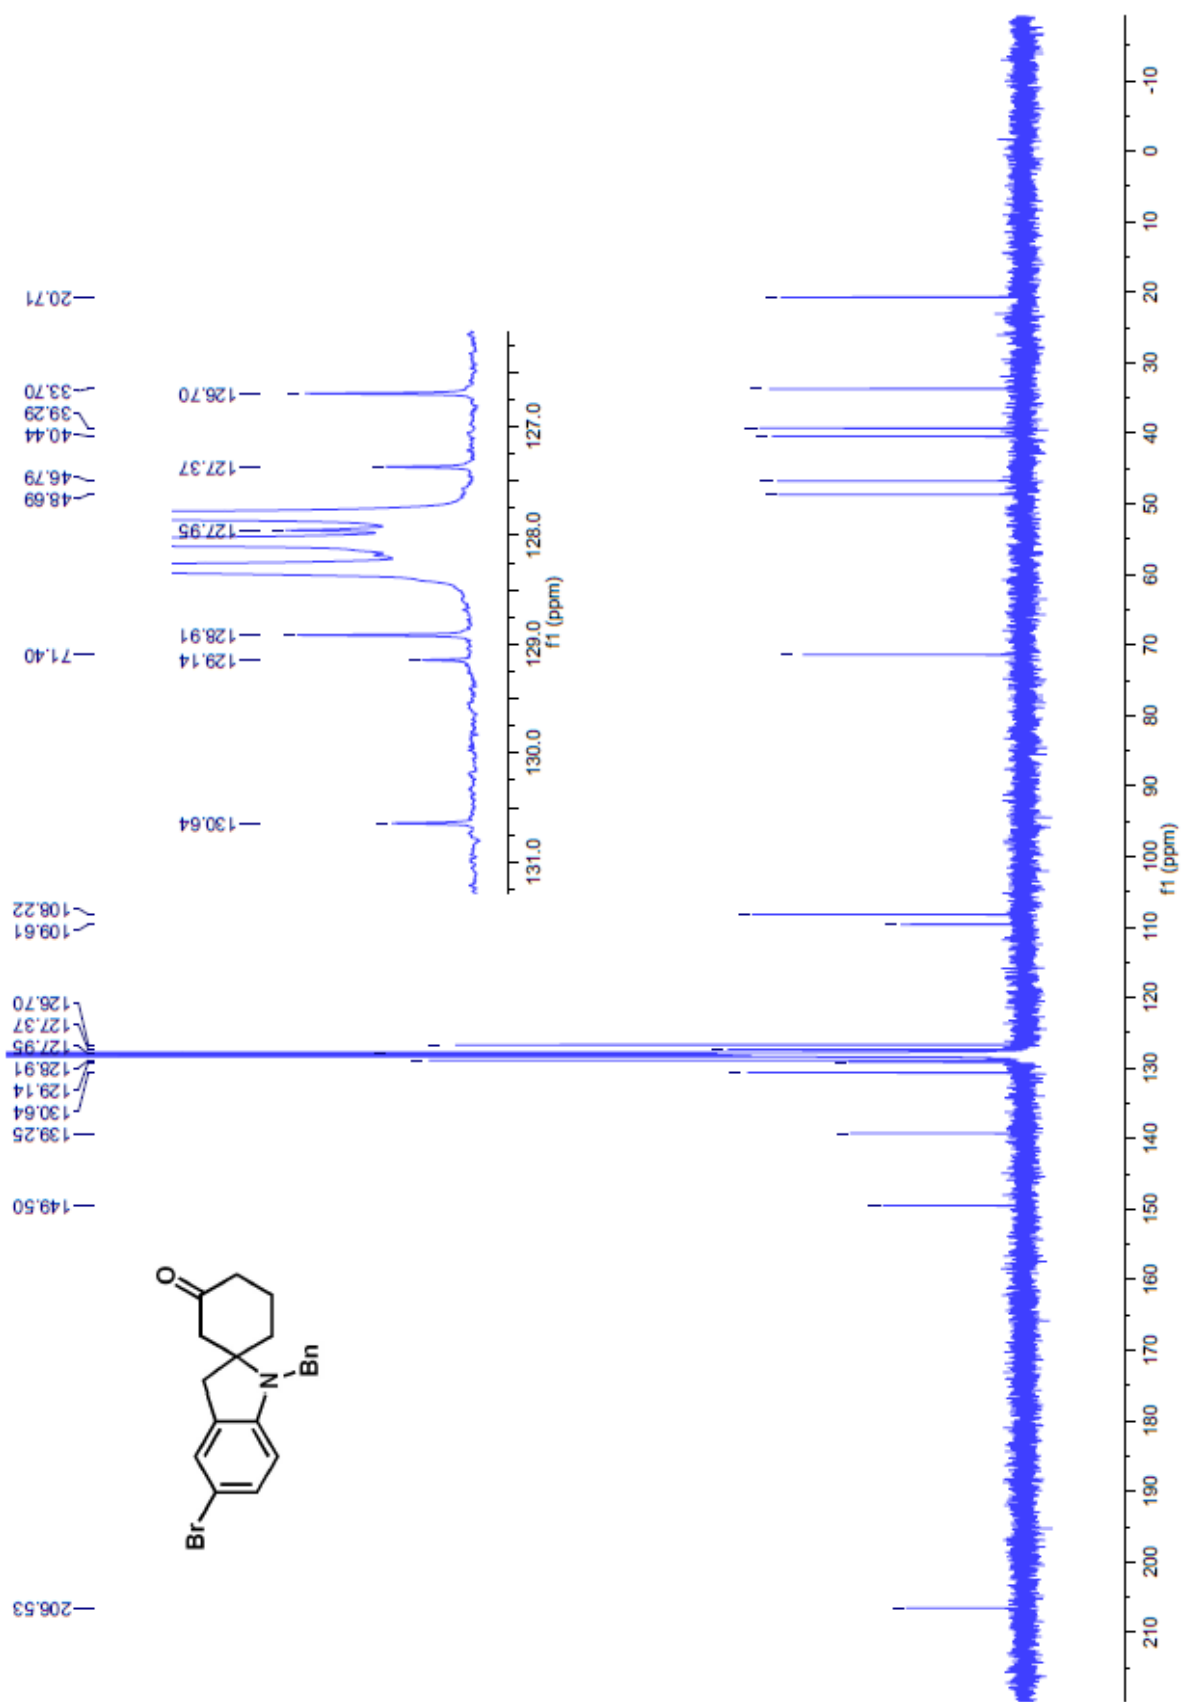

<sup>13</sup>C NMR (100 MHz, C<sub>6</sub>D<sub>6</sub>) of **3ja**

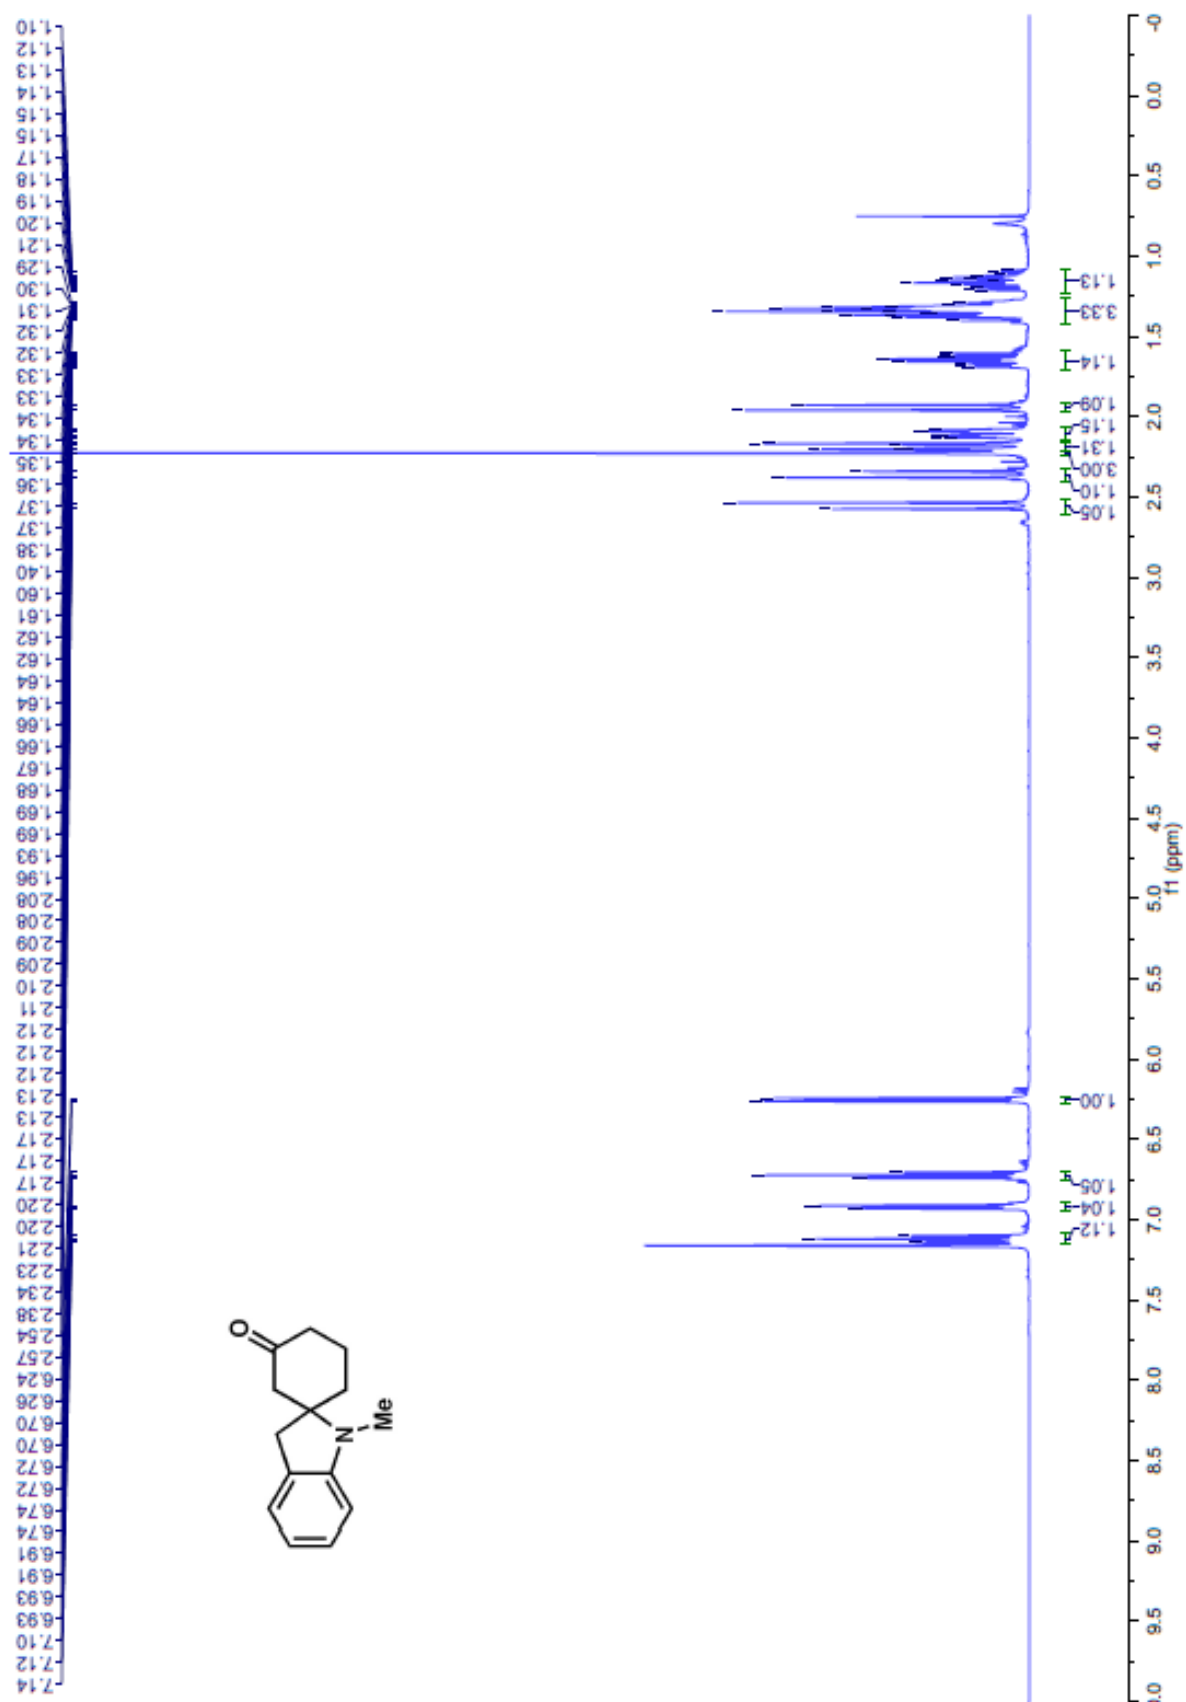

<sup>1</sup>H NMR (400 MHz, C<sub>6</sub>D<sub>6</sub>) of **3ka**

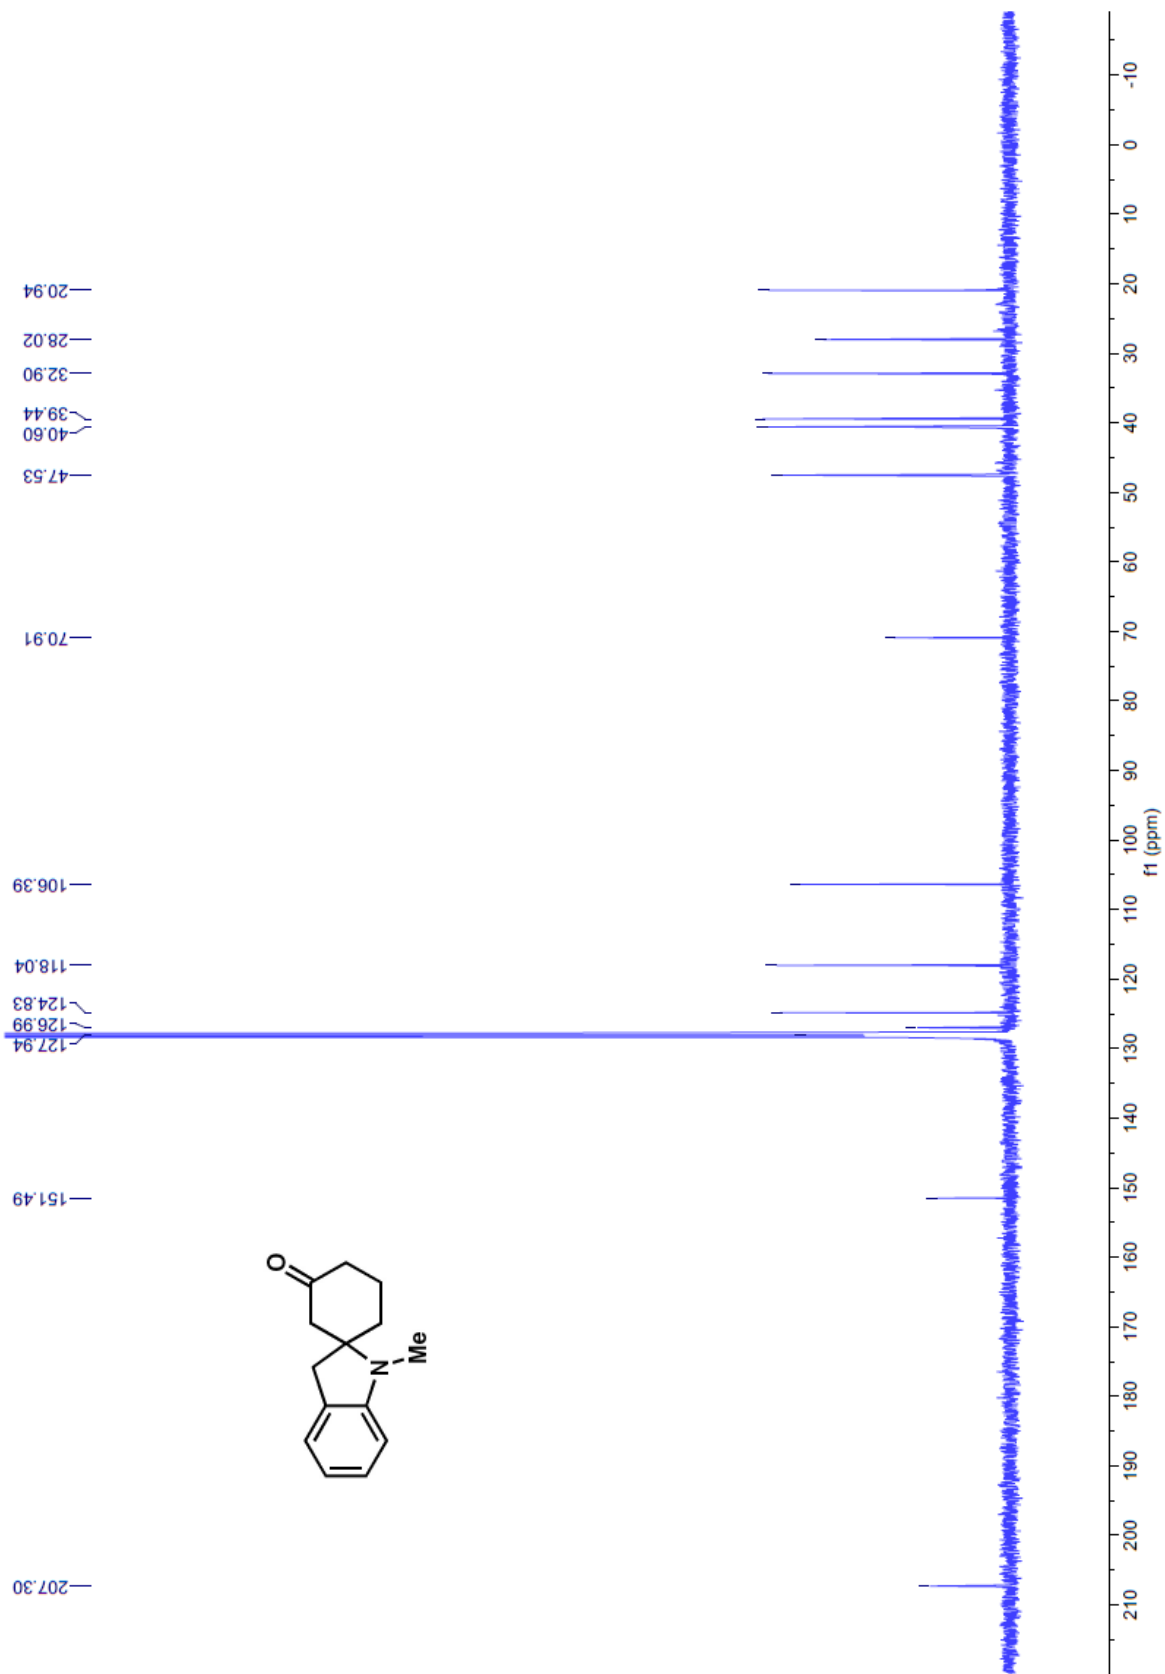



<sup>1</sup>H NMR (400 MHz, C<sub>6</sub>D<sub>6</sub>) of **3ab**

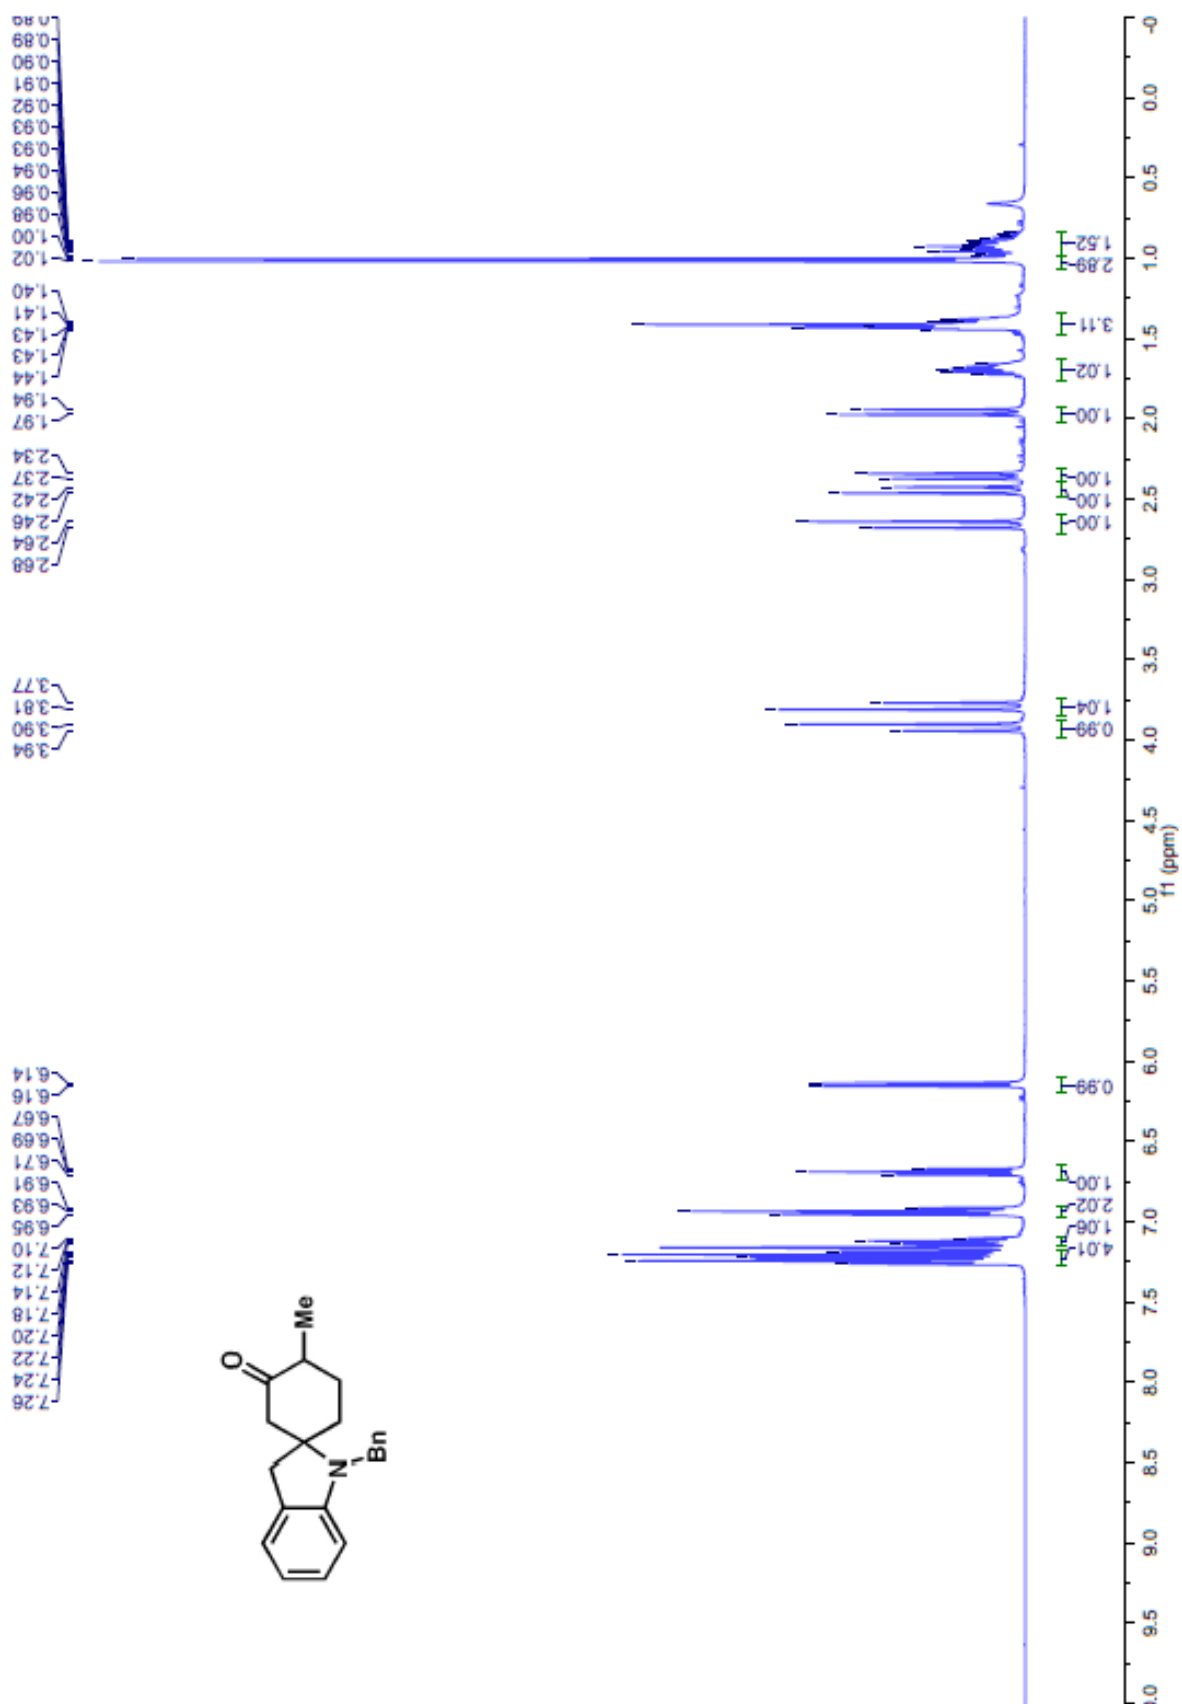

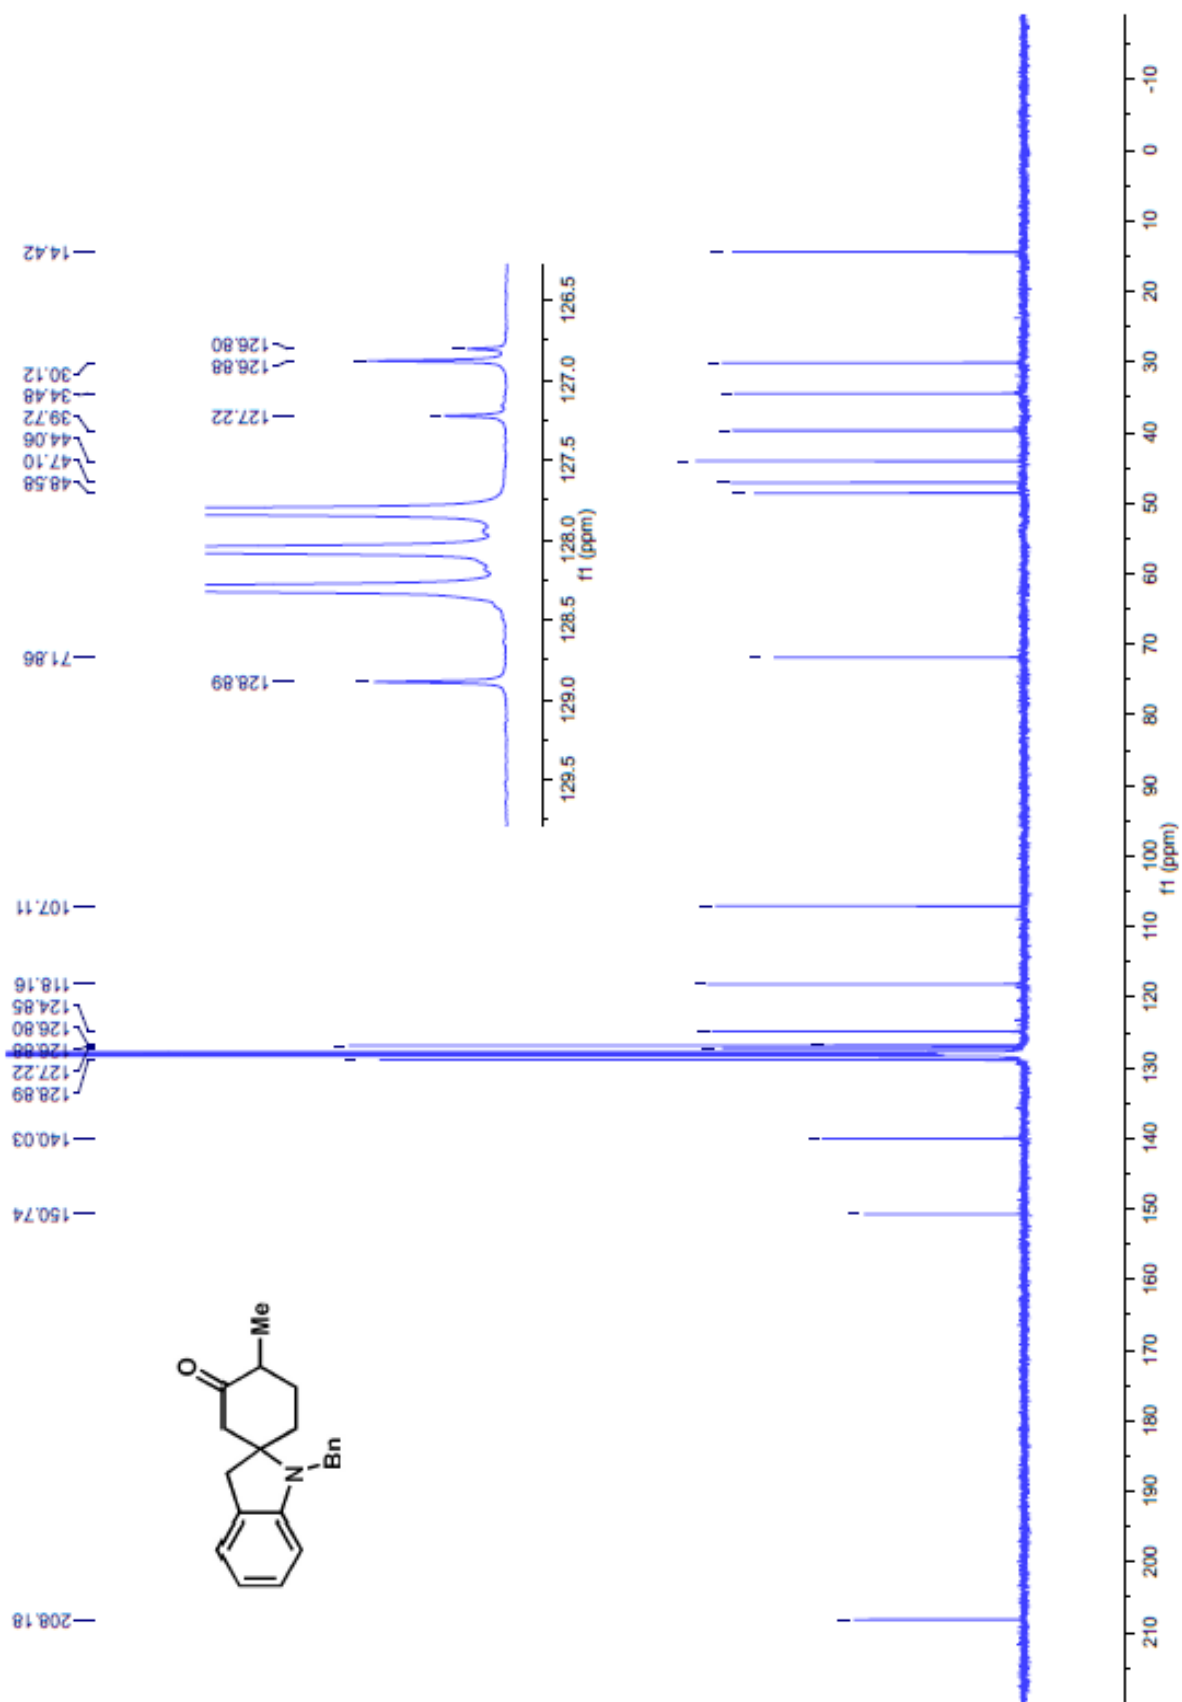

<sup>13</sup>C NMR (100 MHz, C<sub>6</sub>D<sub>6</sub>) of **3ab**

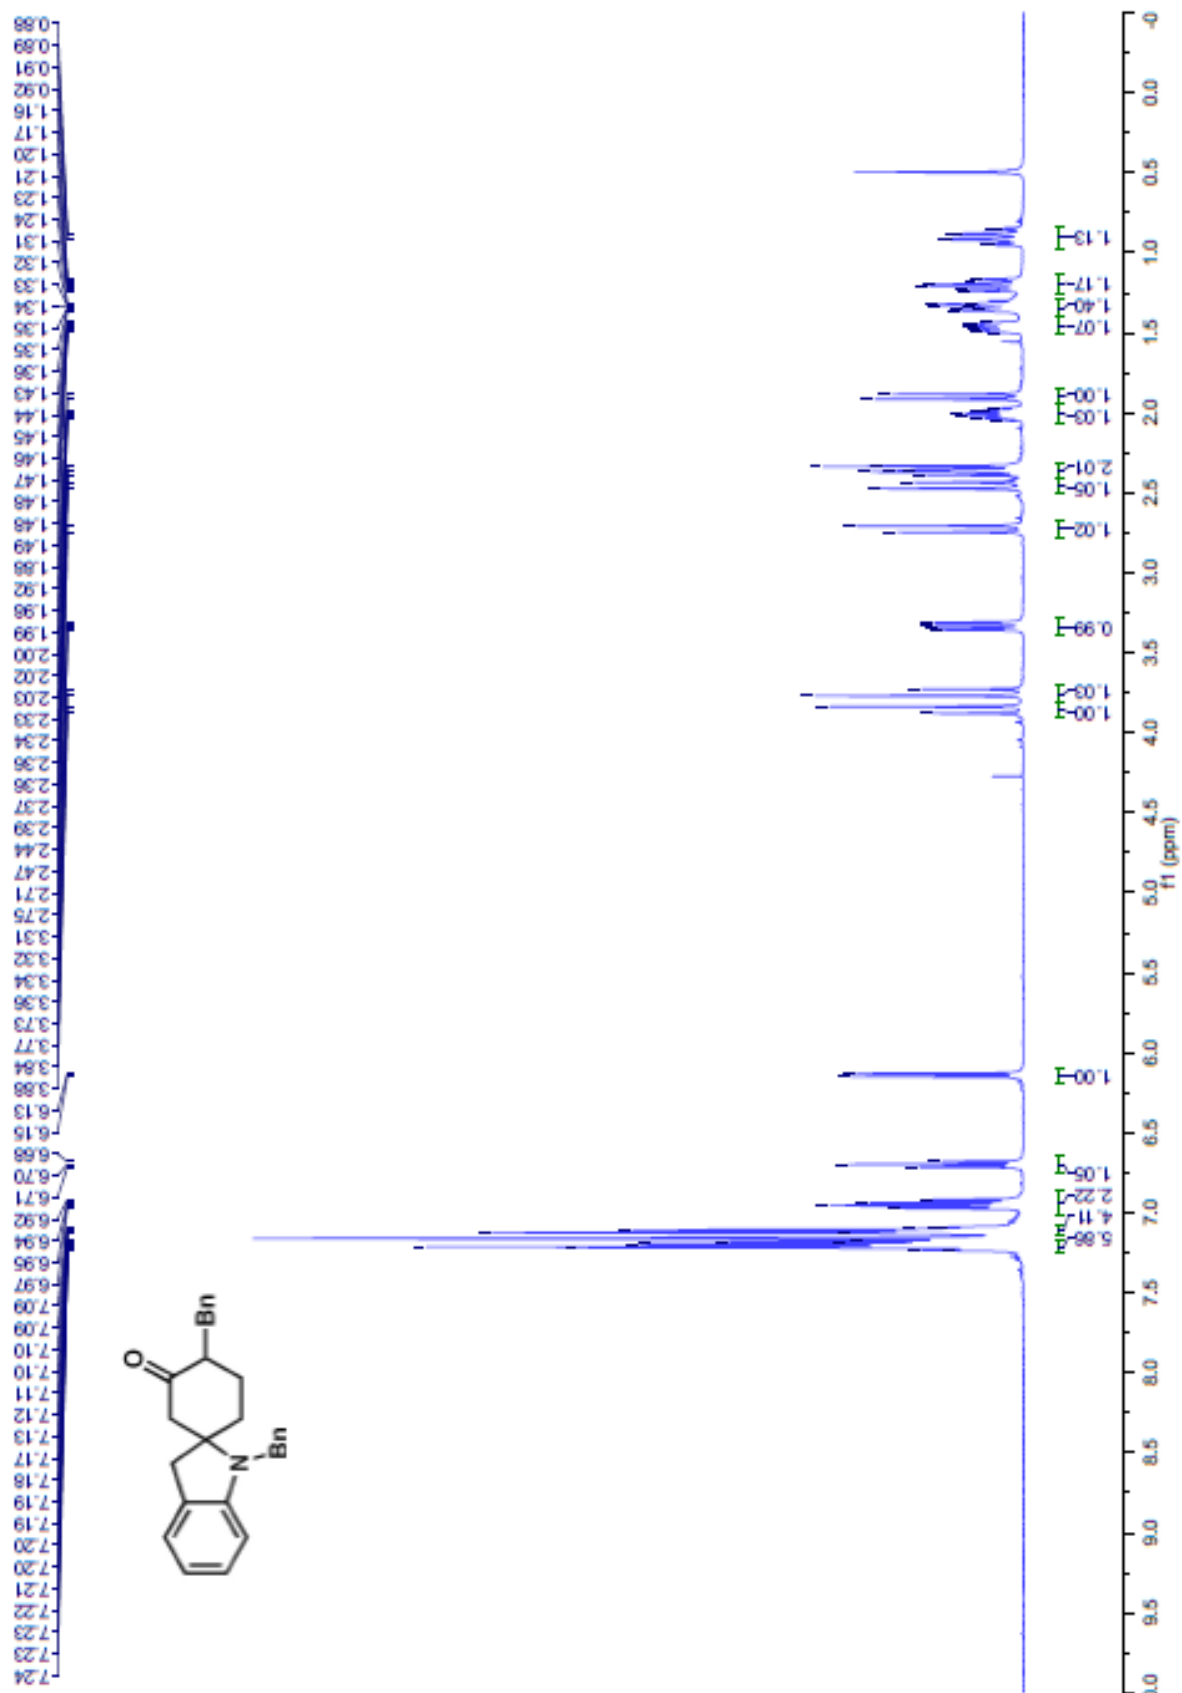

$^1\text{H}$  NMR (400 MHz,  $\text{C}_6\text{D}_6$ ) of 3ac

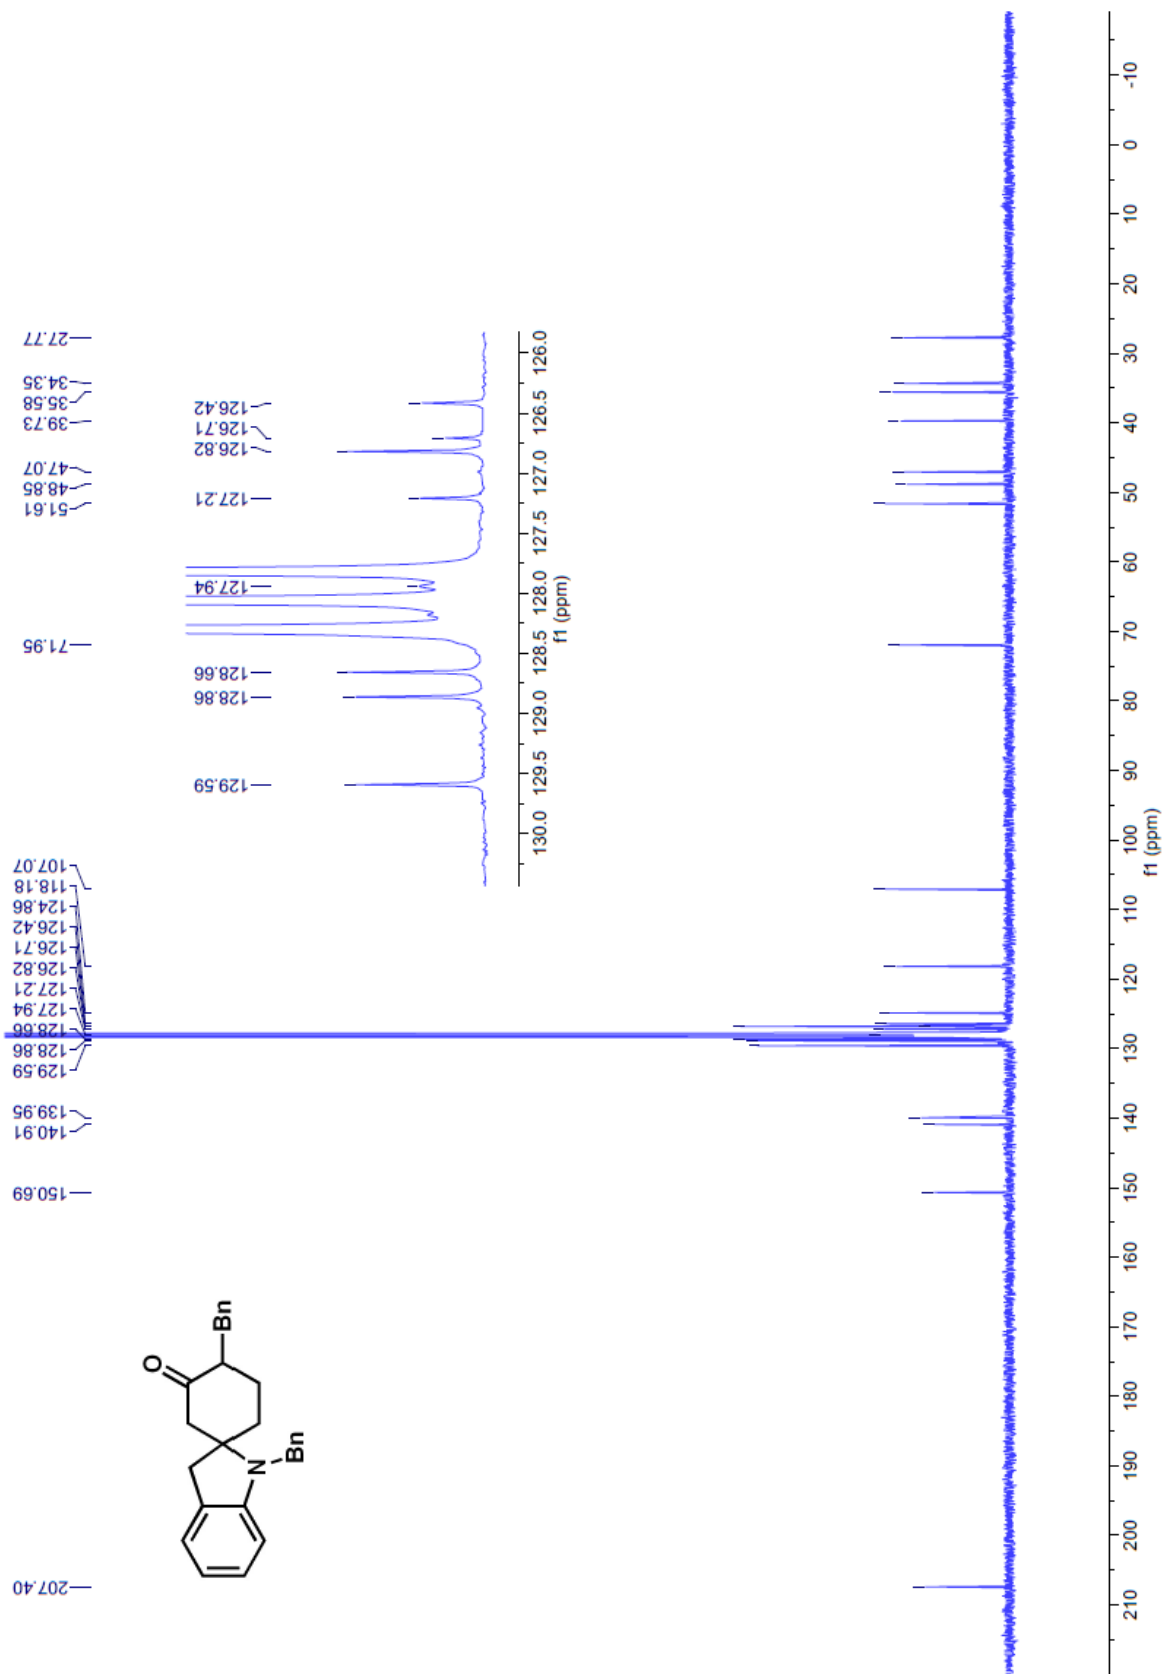

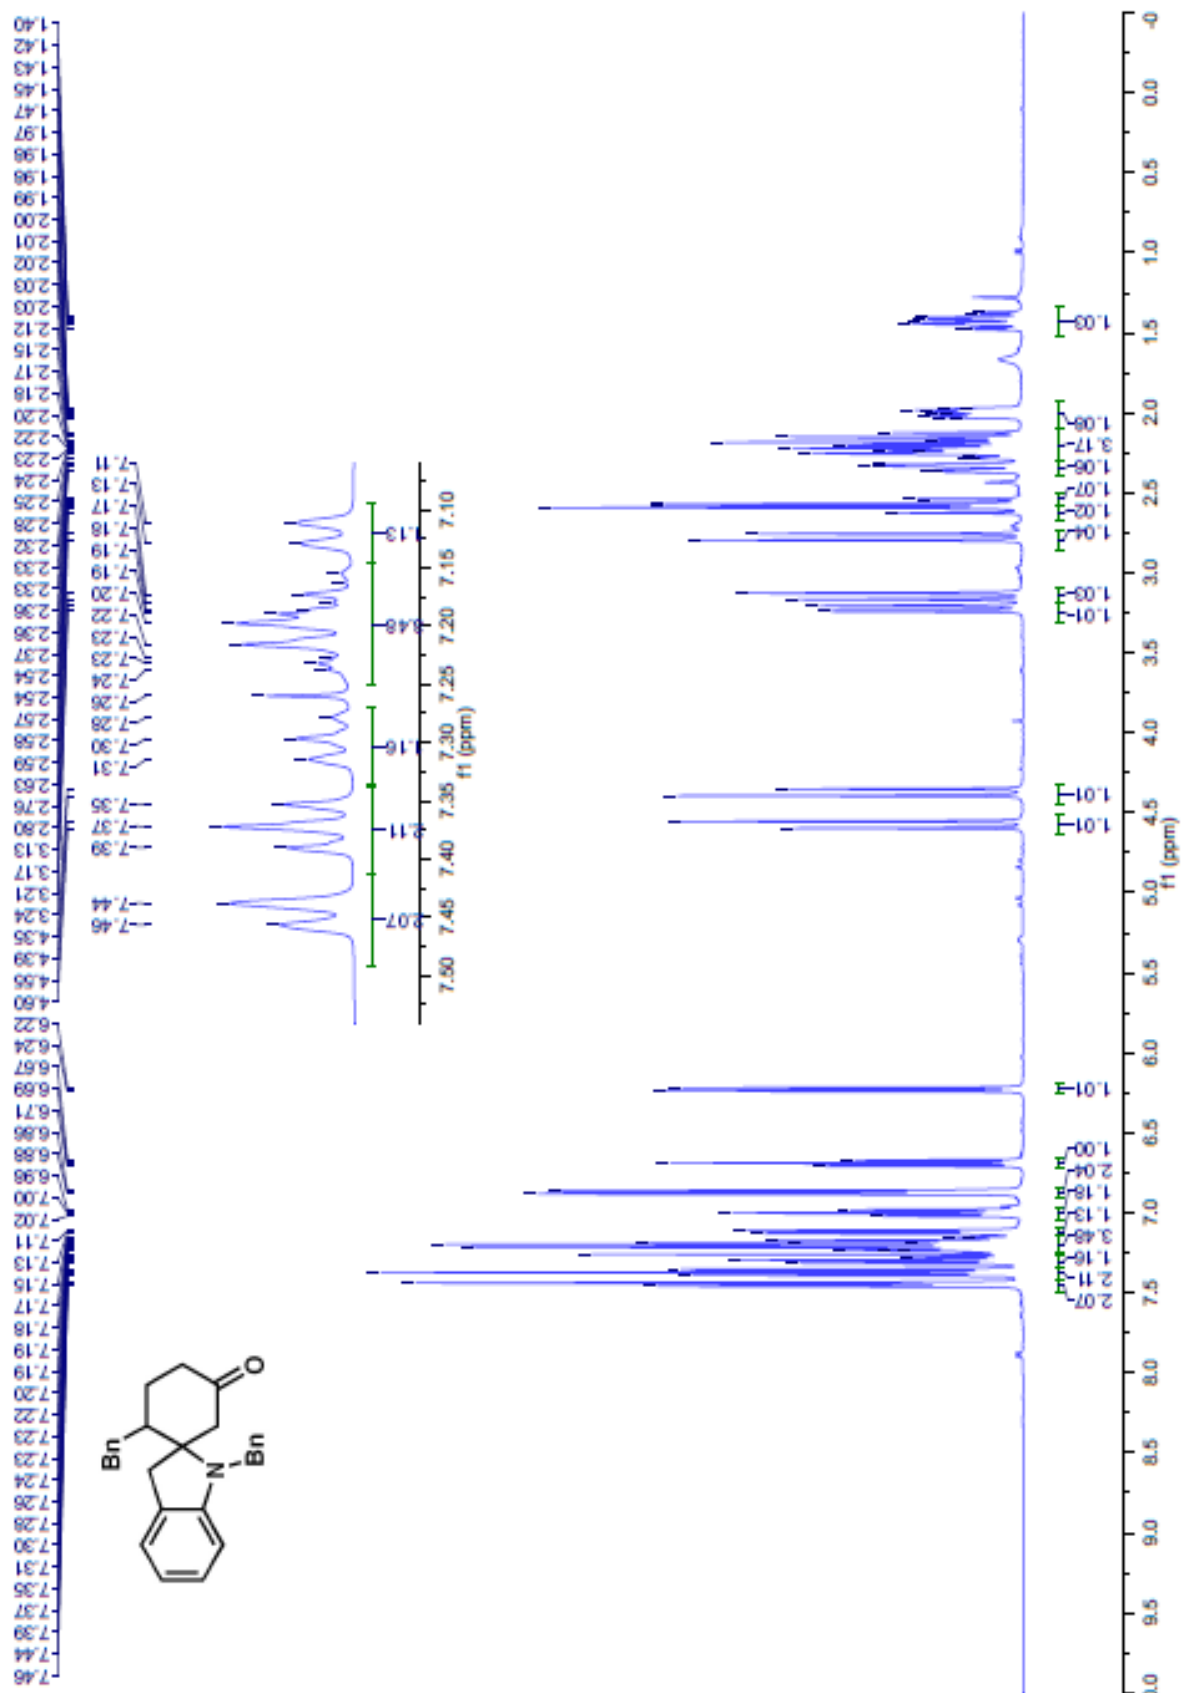

<sup>1</sup>H NMR (400 MHz, CDCl<sub>3</sub>) of 3ad

<sup>13</sup>C NMR (100 MHz, CDCl<sub>3</sub>) of **3ad**

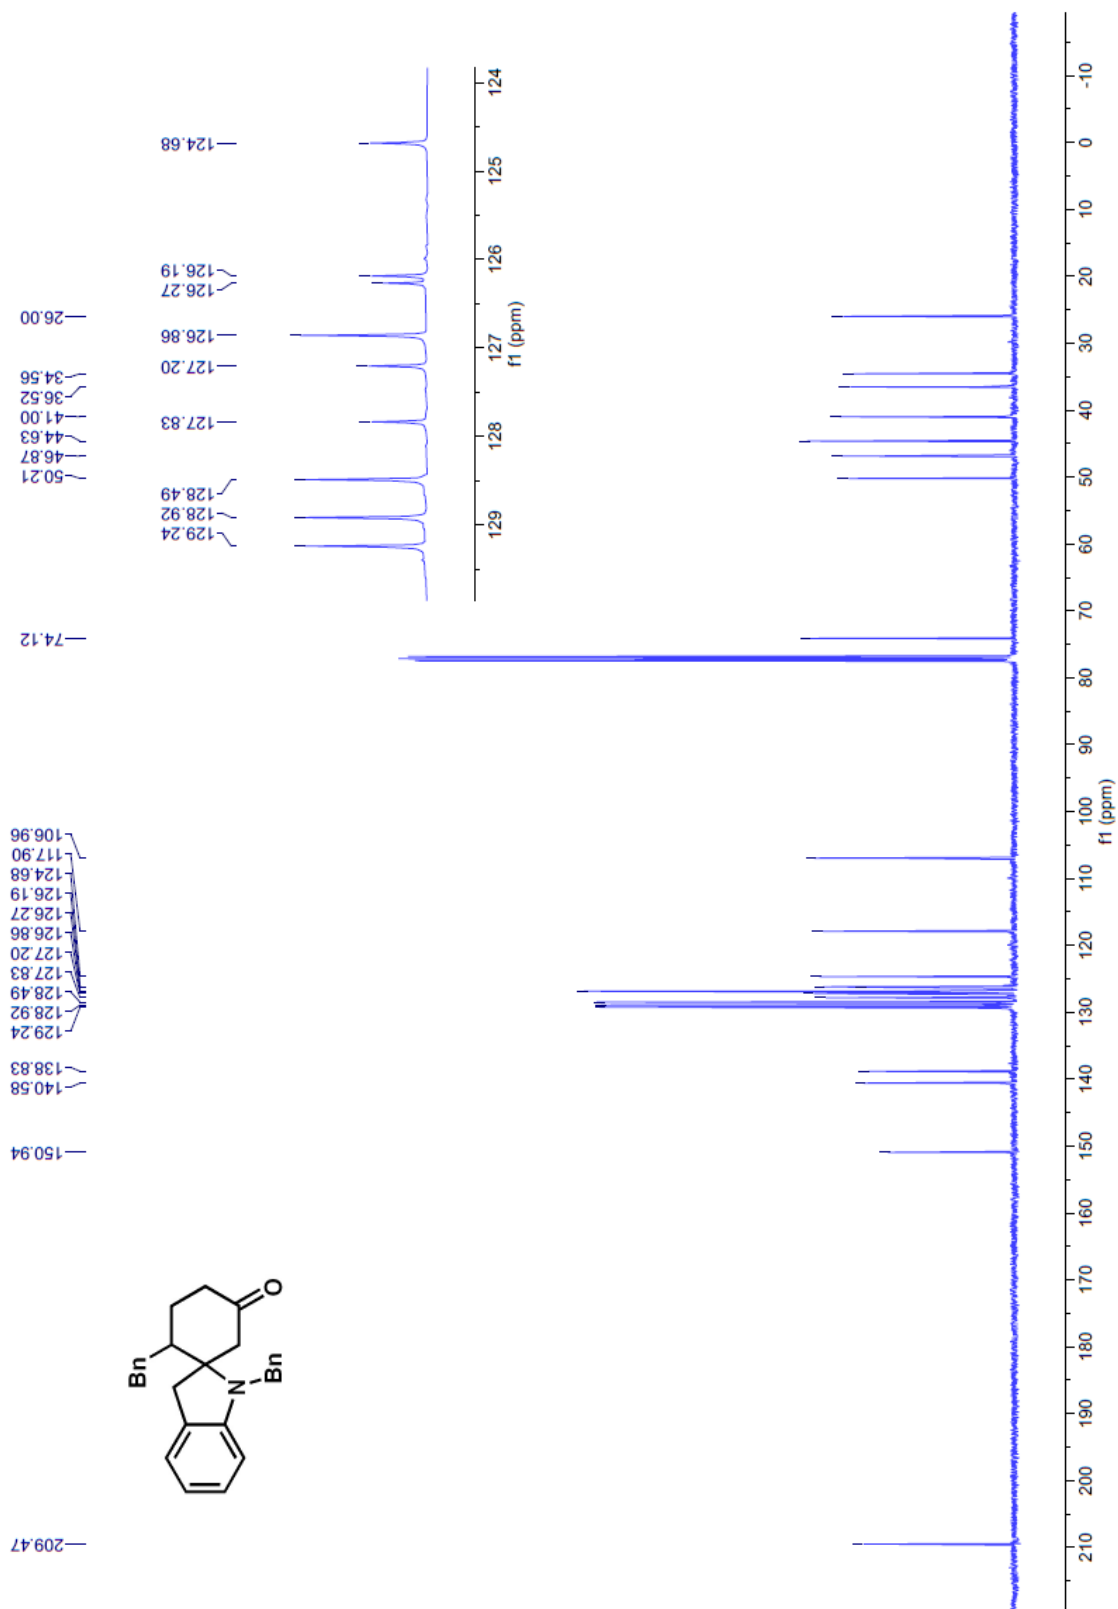

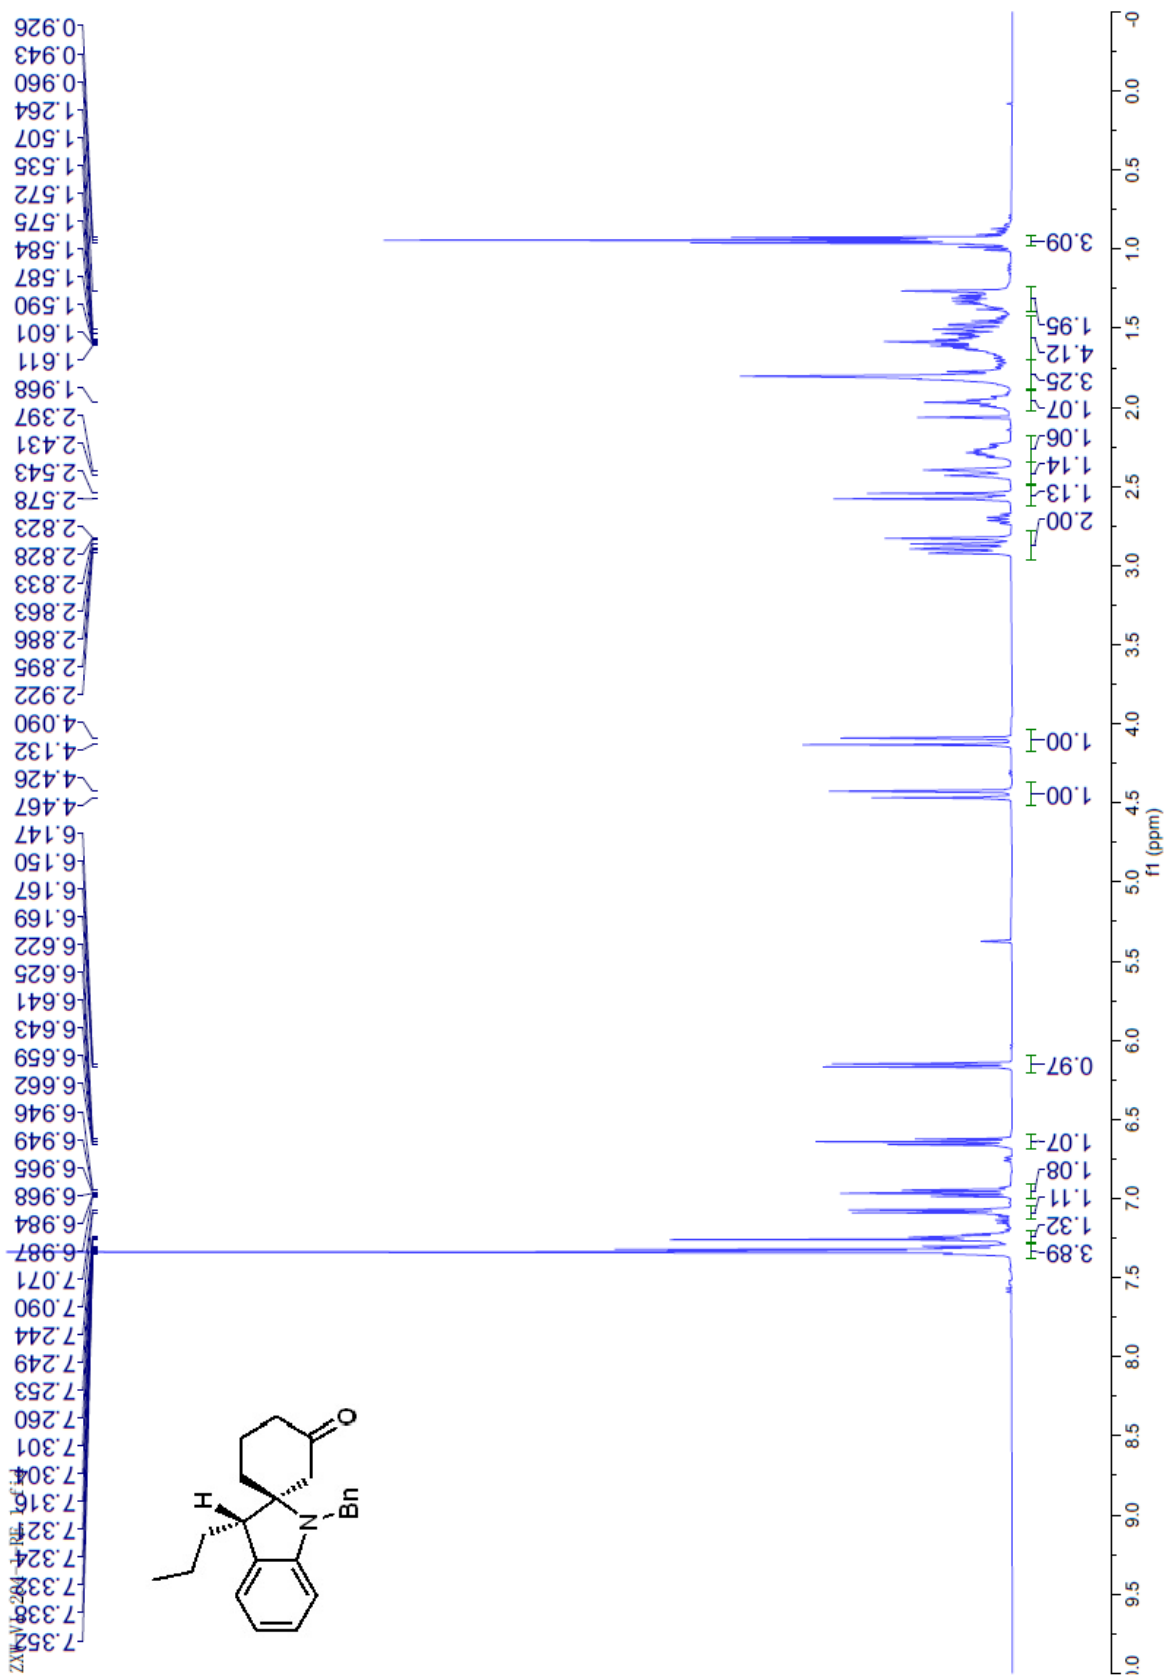

ZXW-Vd204-1B-1.3.fid

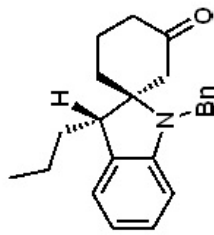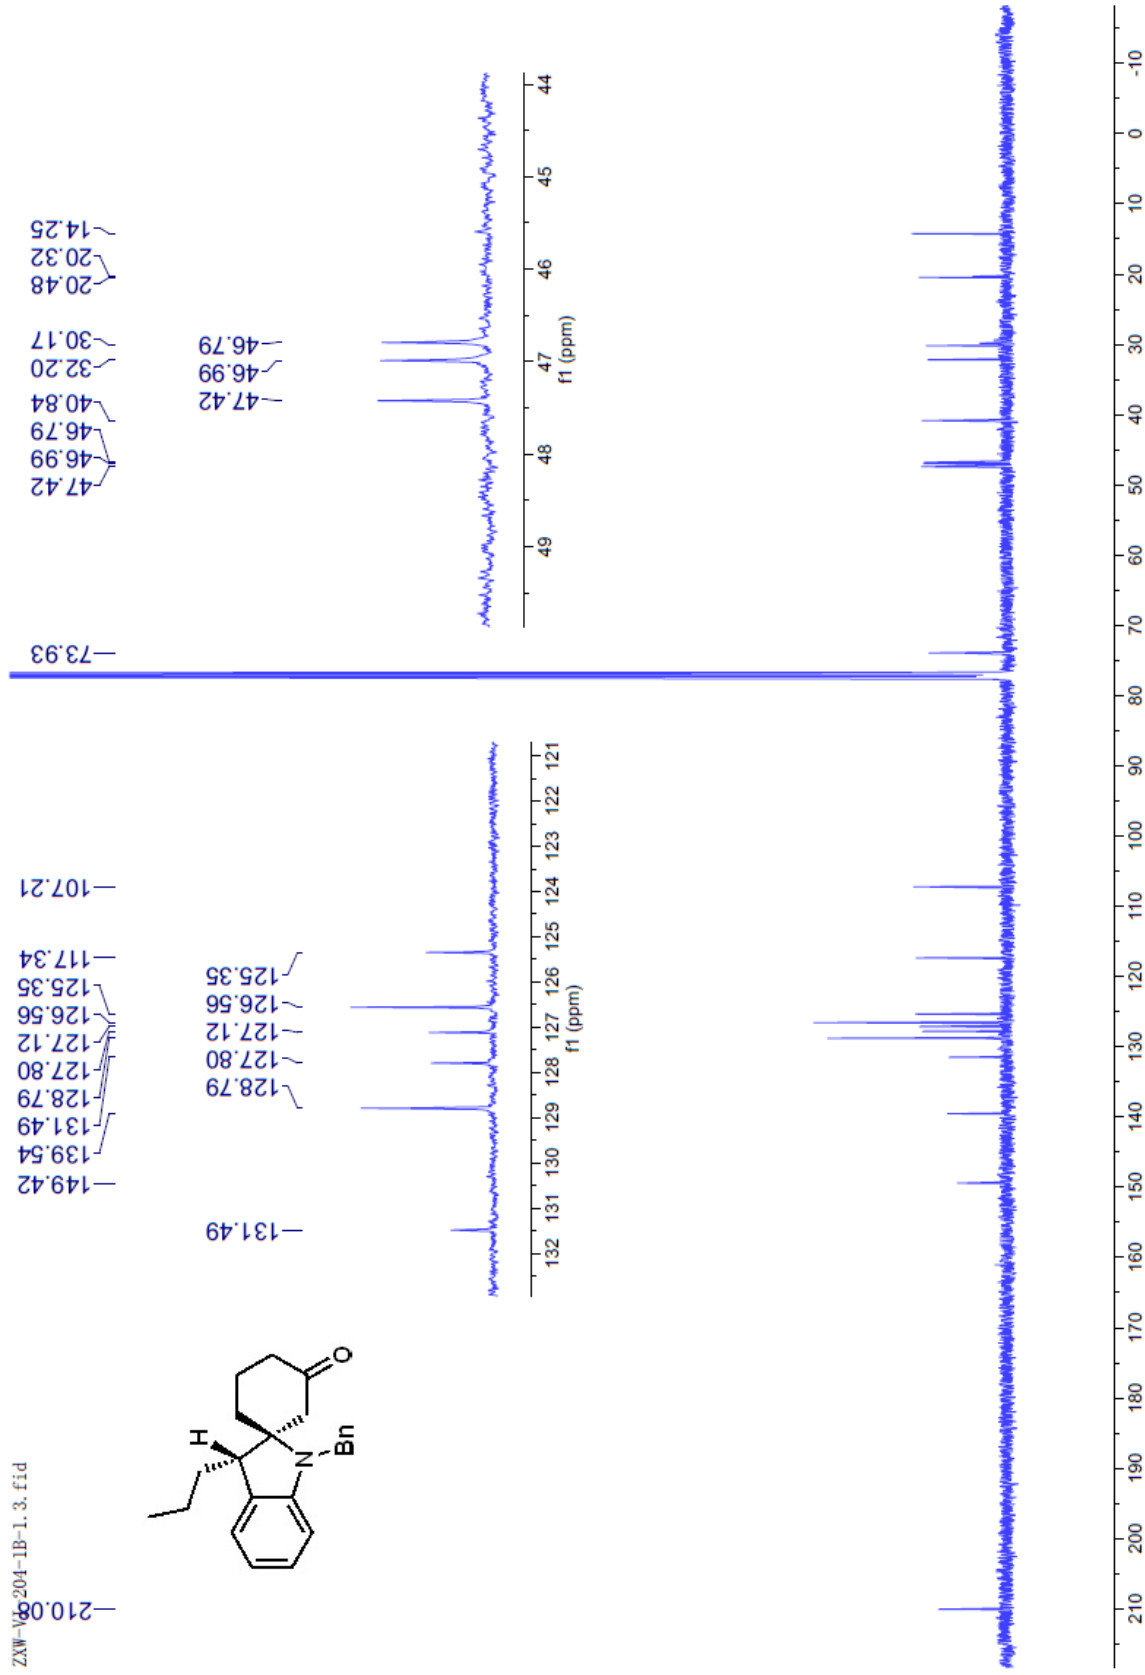



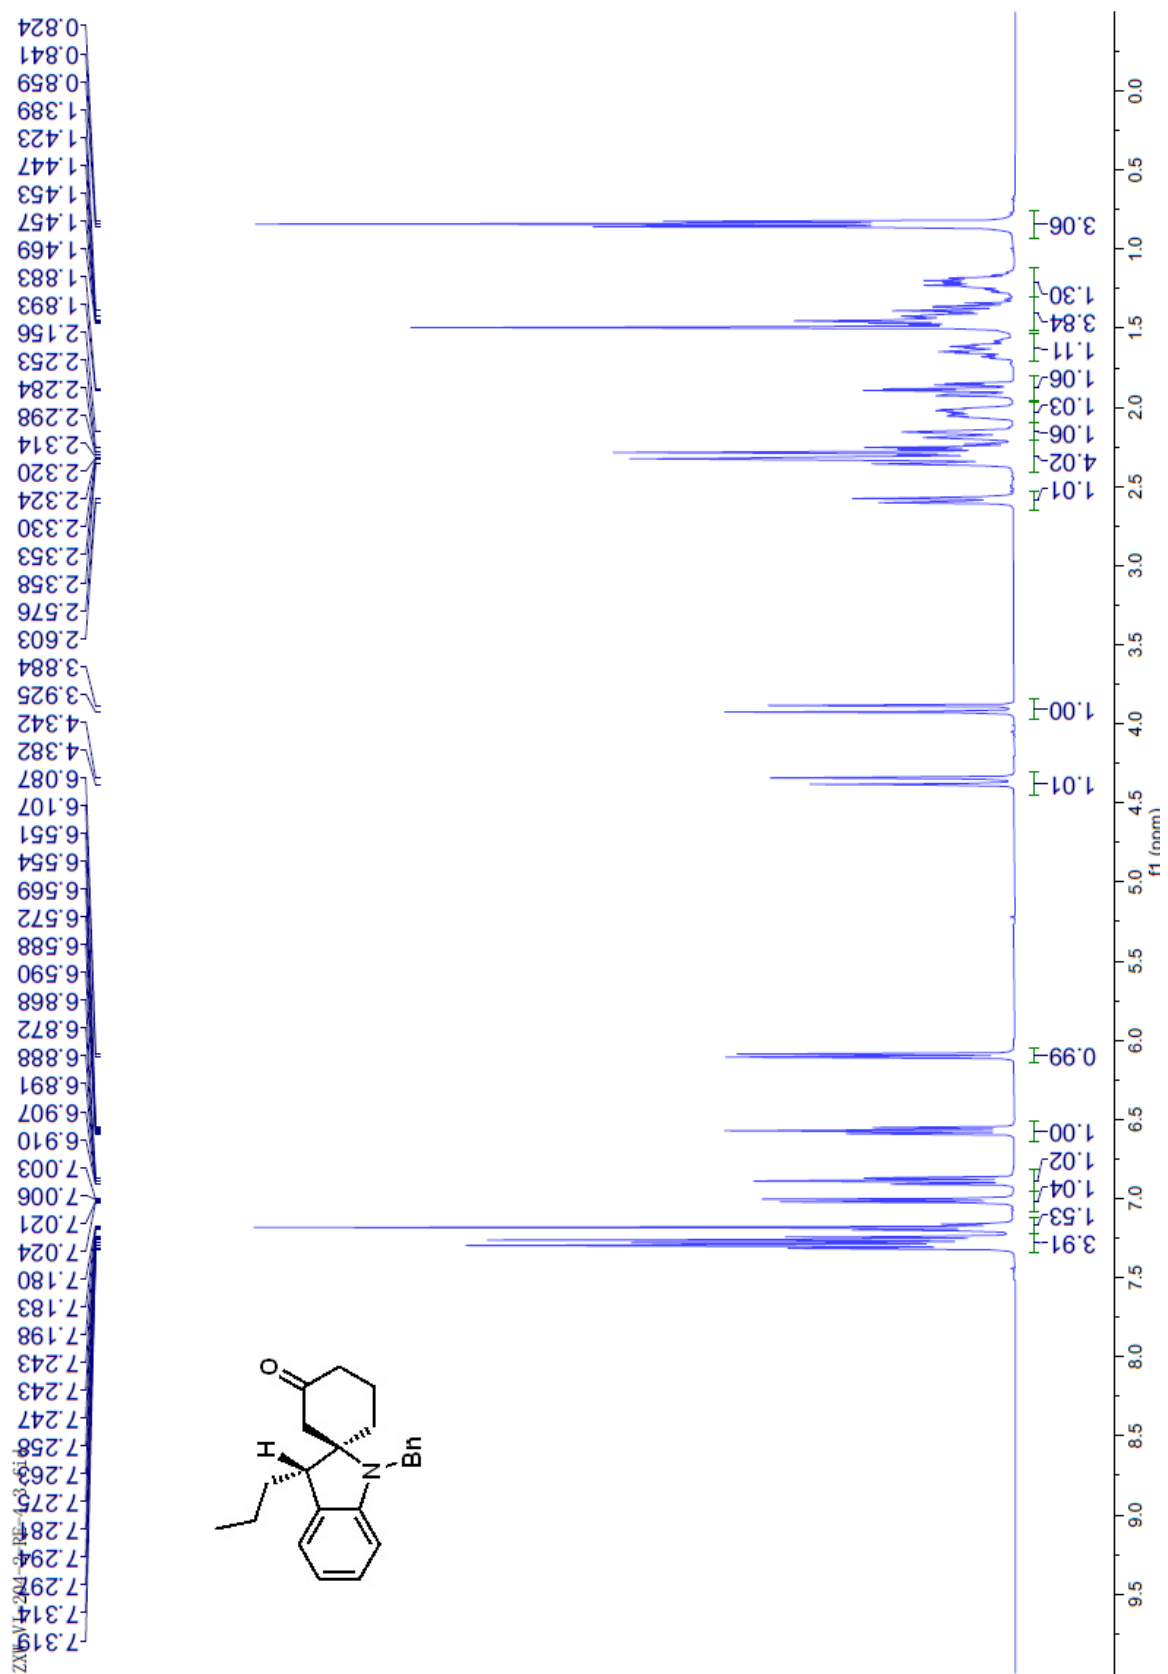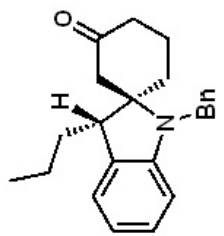

ZXW-V0204-2-RE-2.2.fid

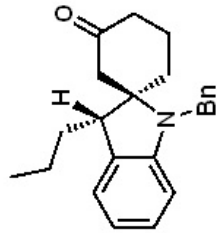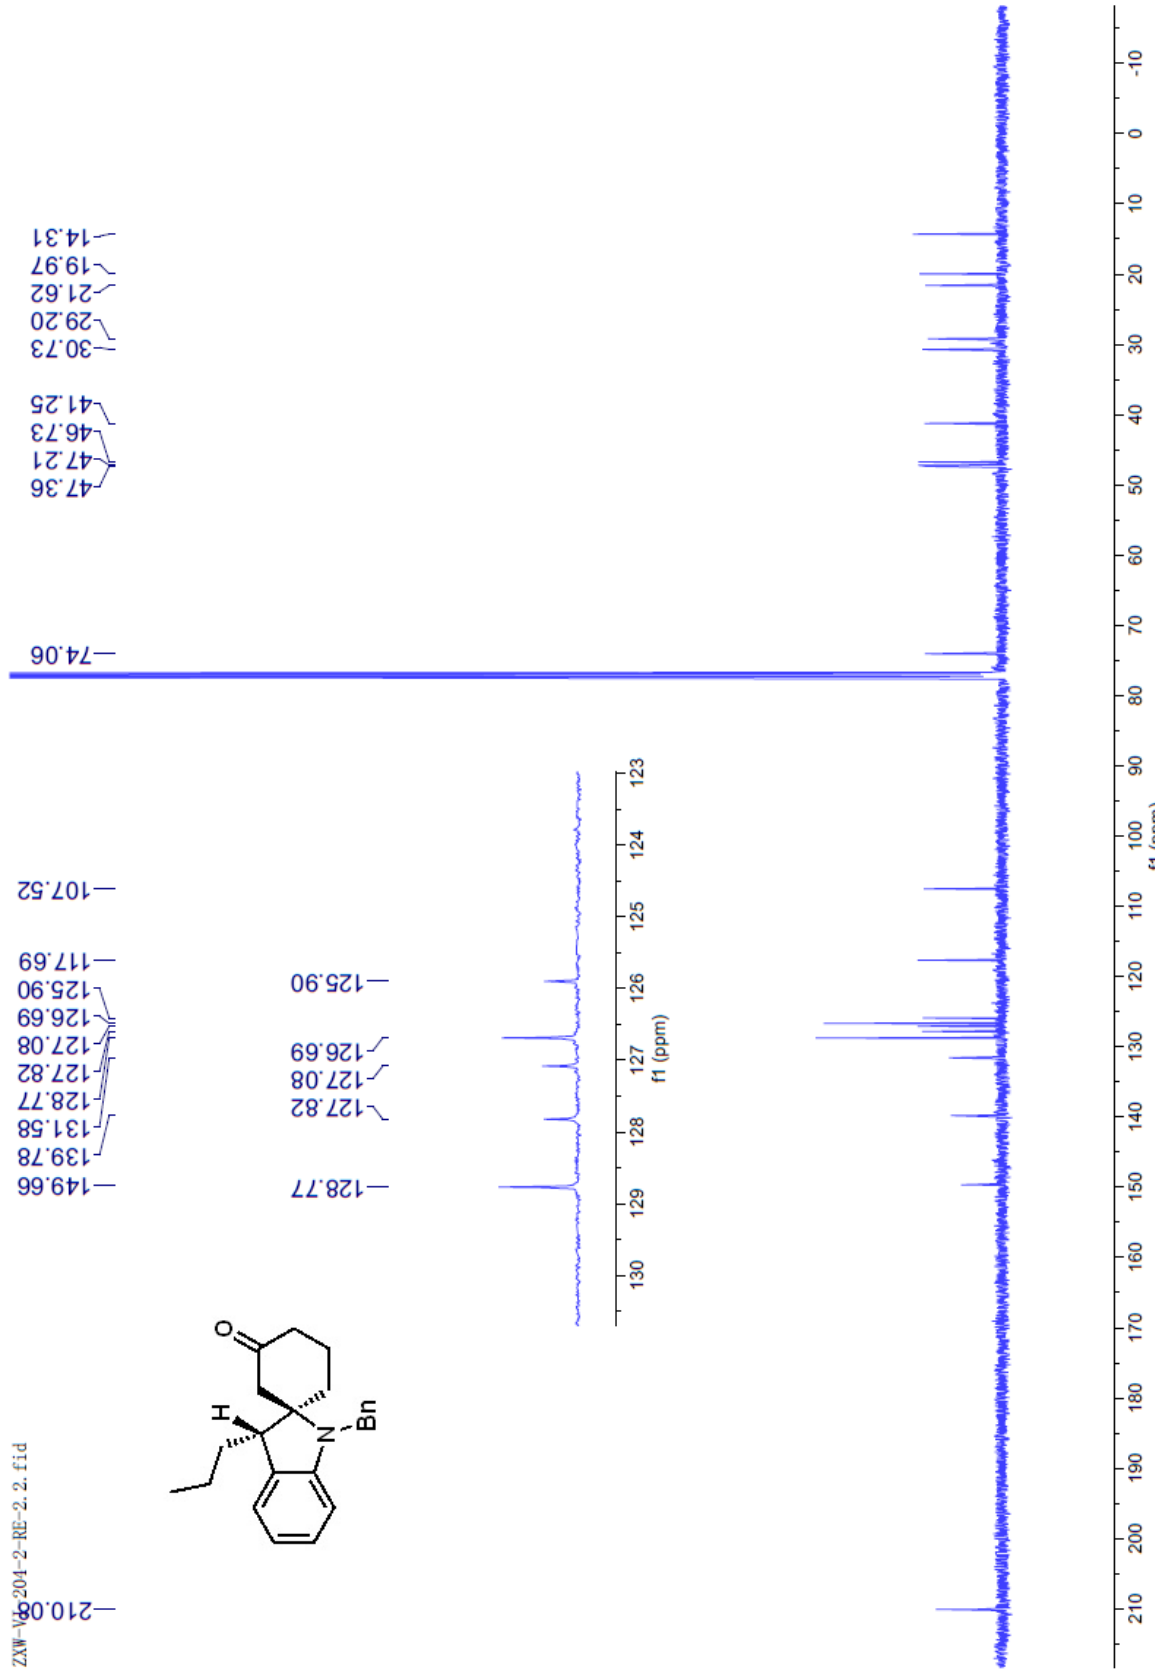

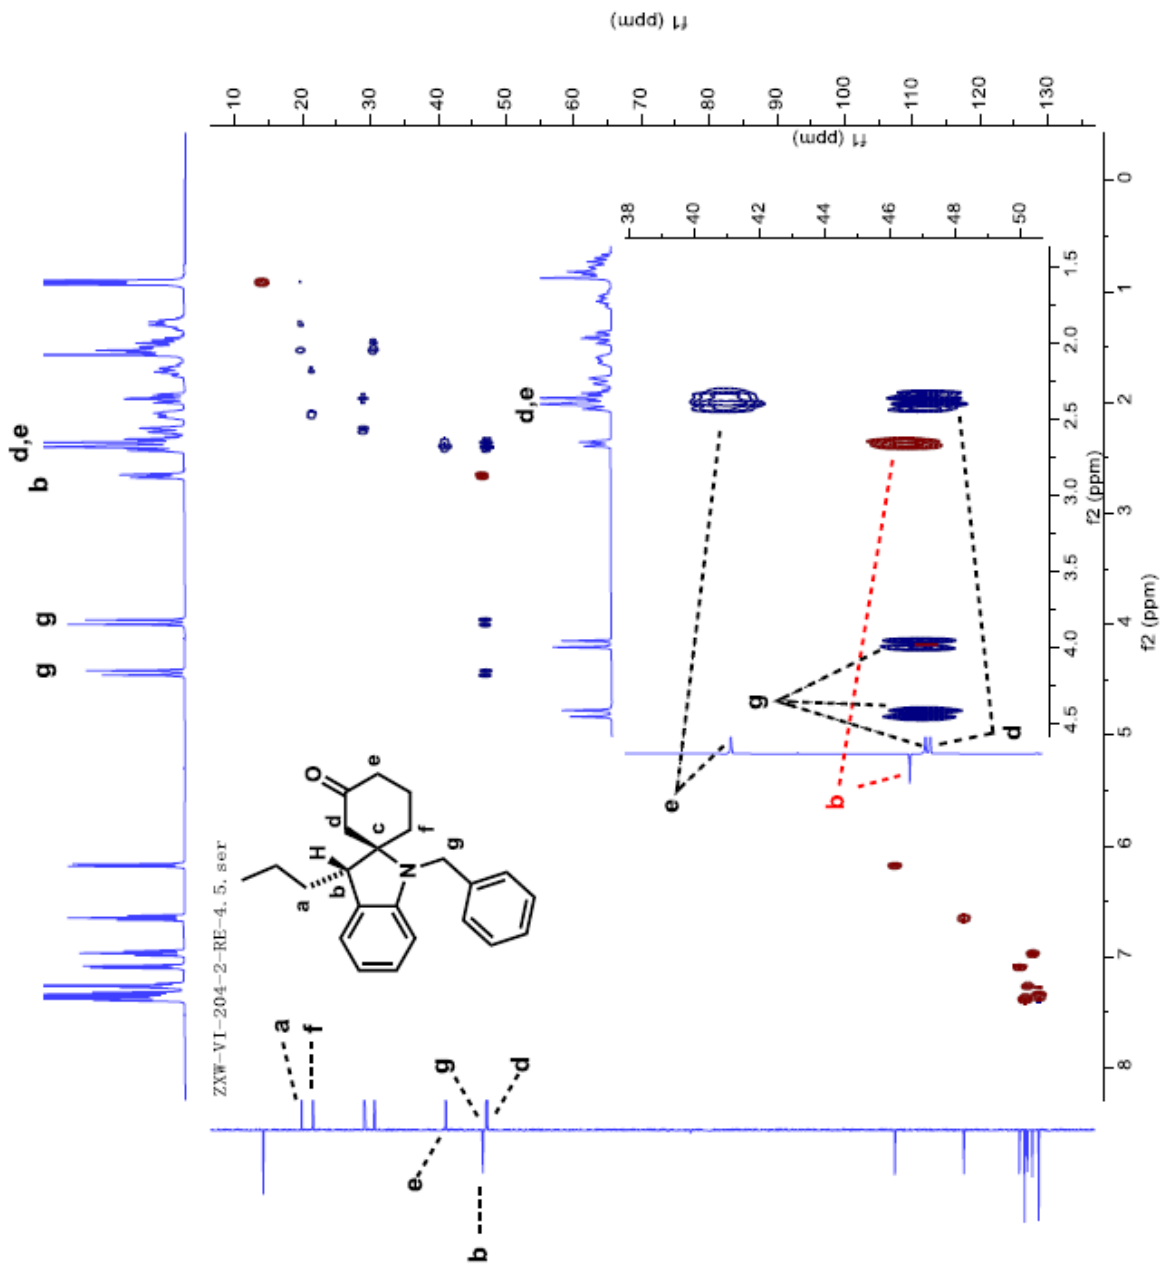

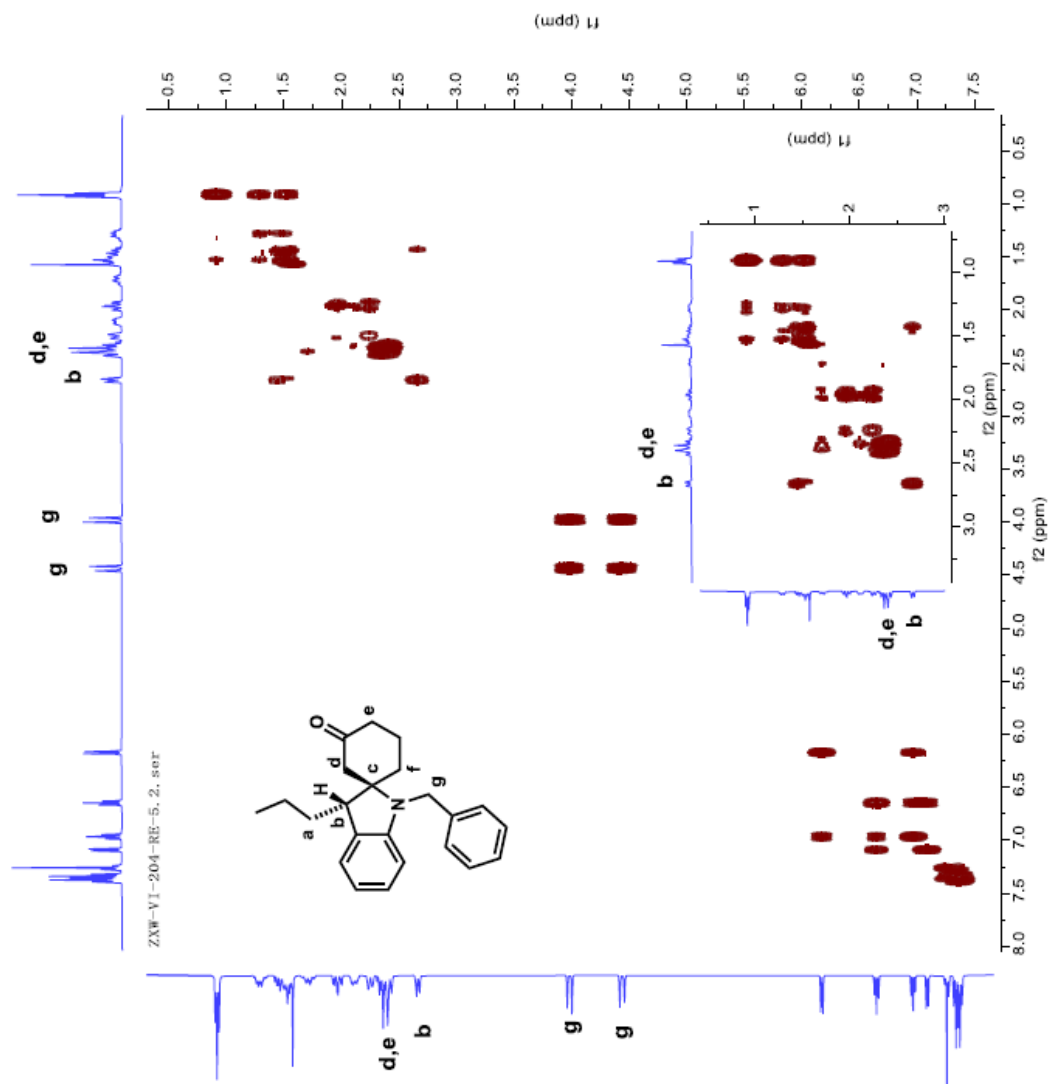

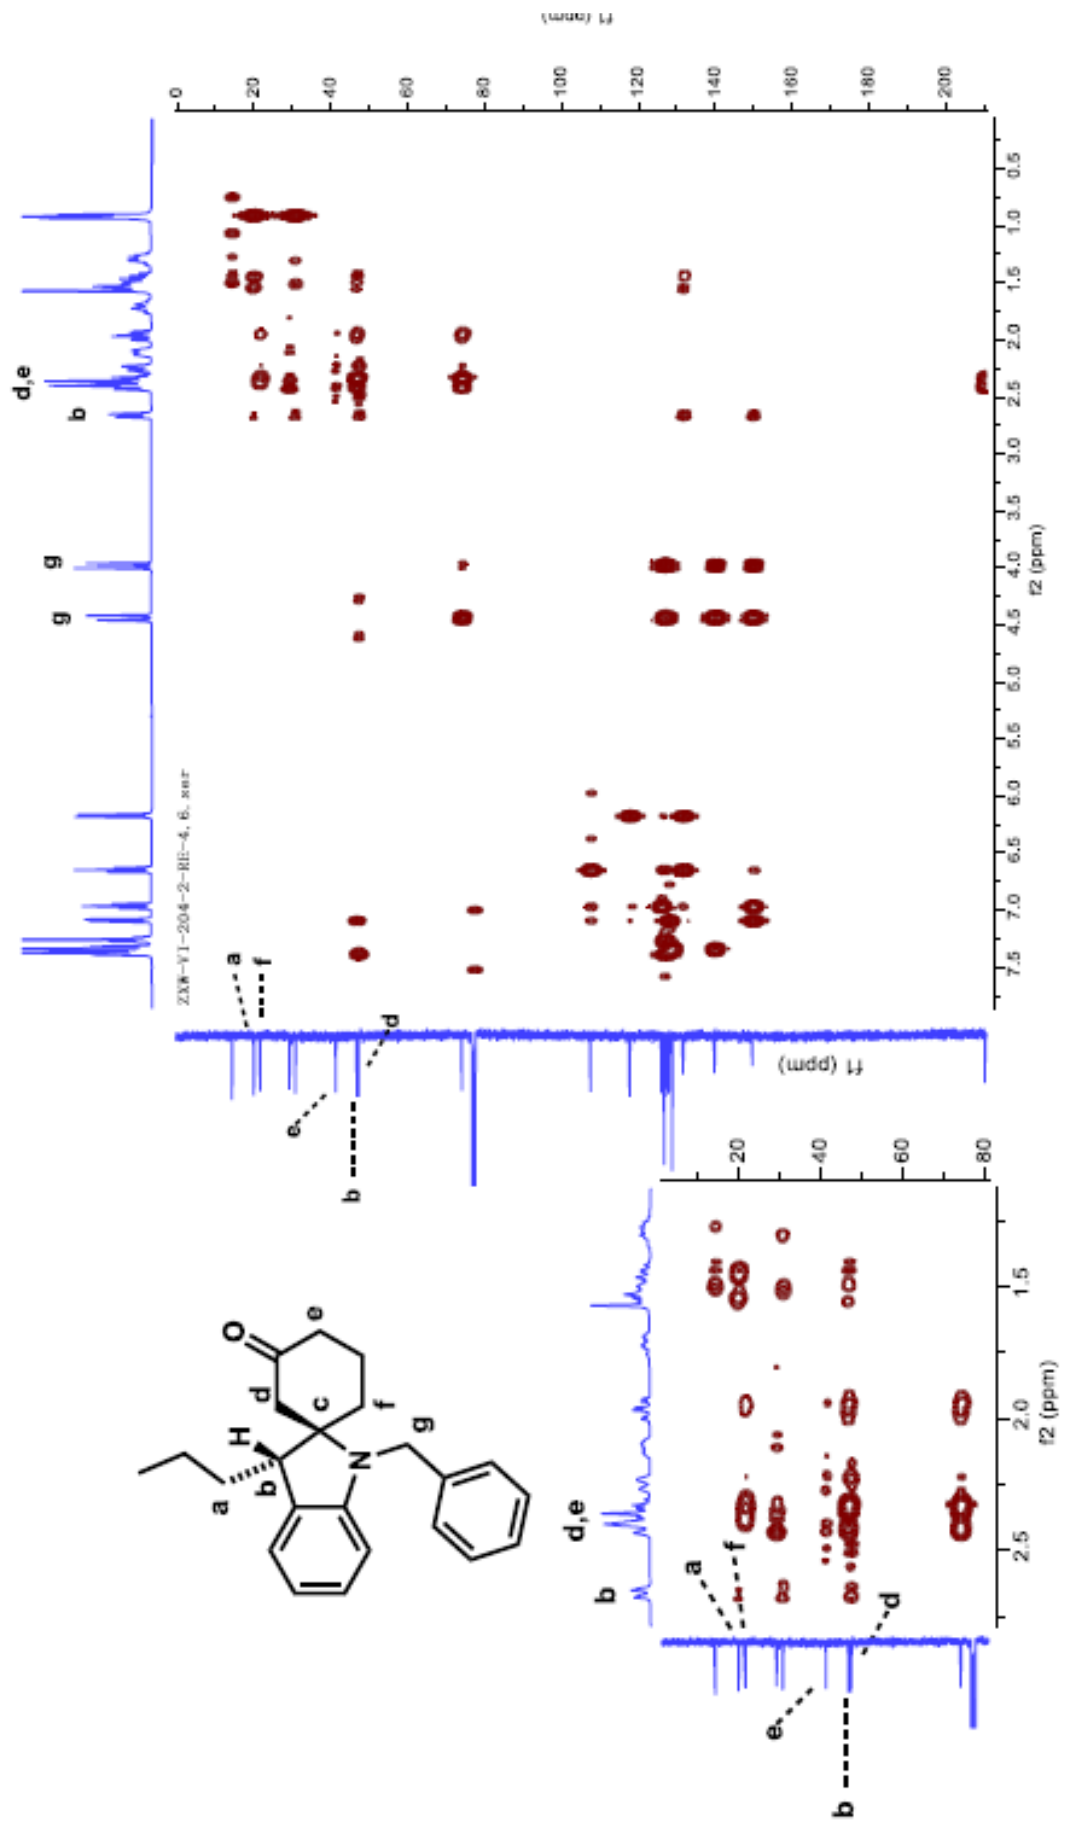

HMBC (400 MHz, CDCl<sub>3</sub>) of *trans*-**3ae**

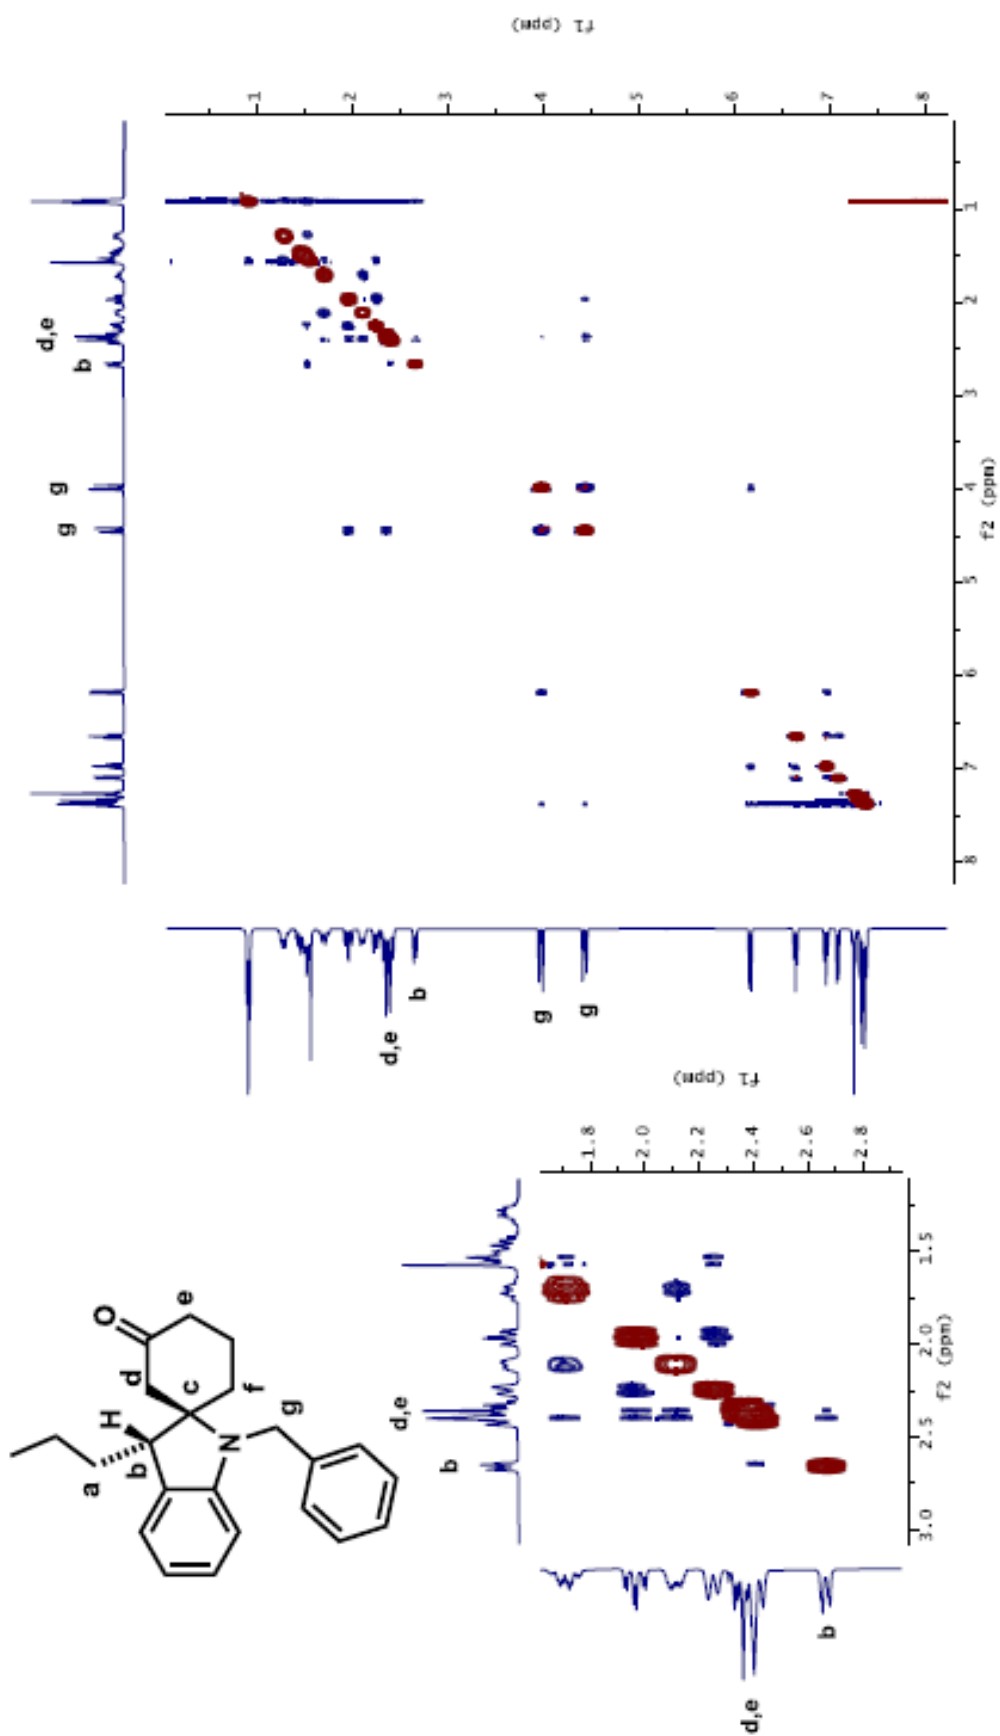



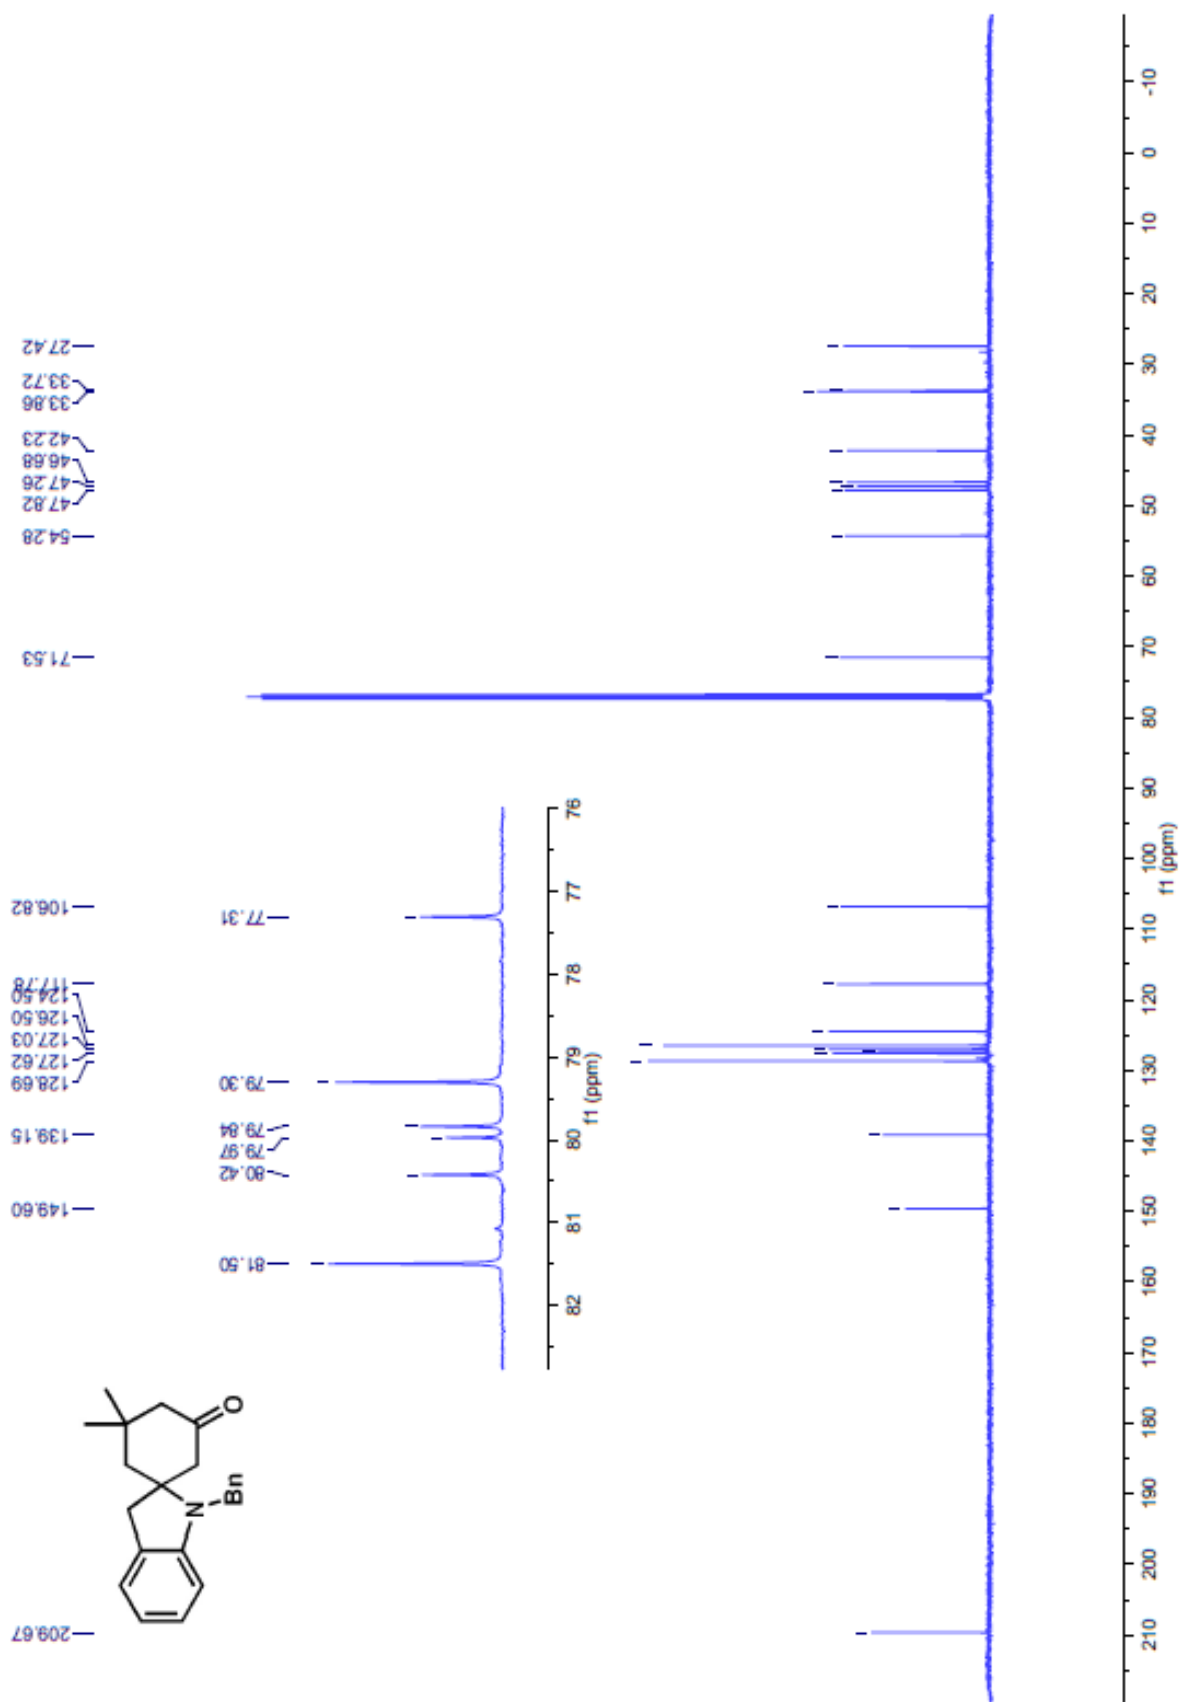



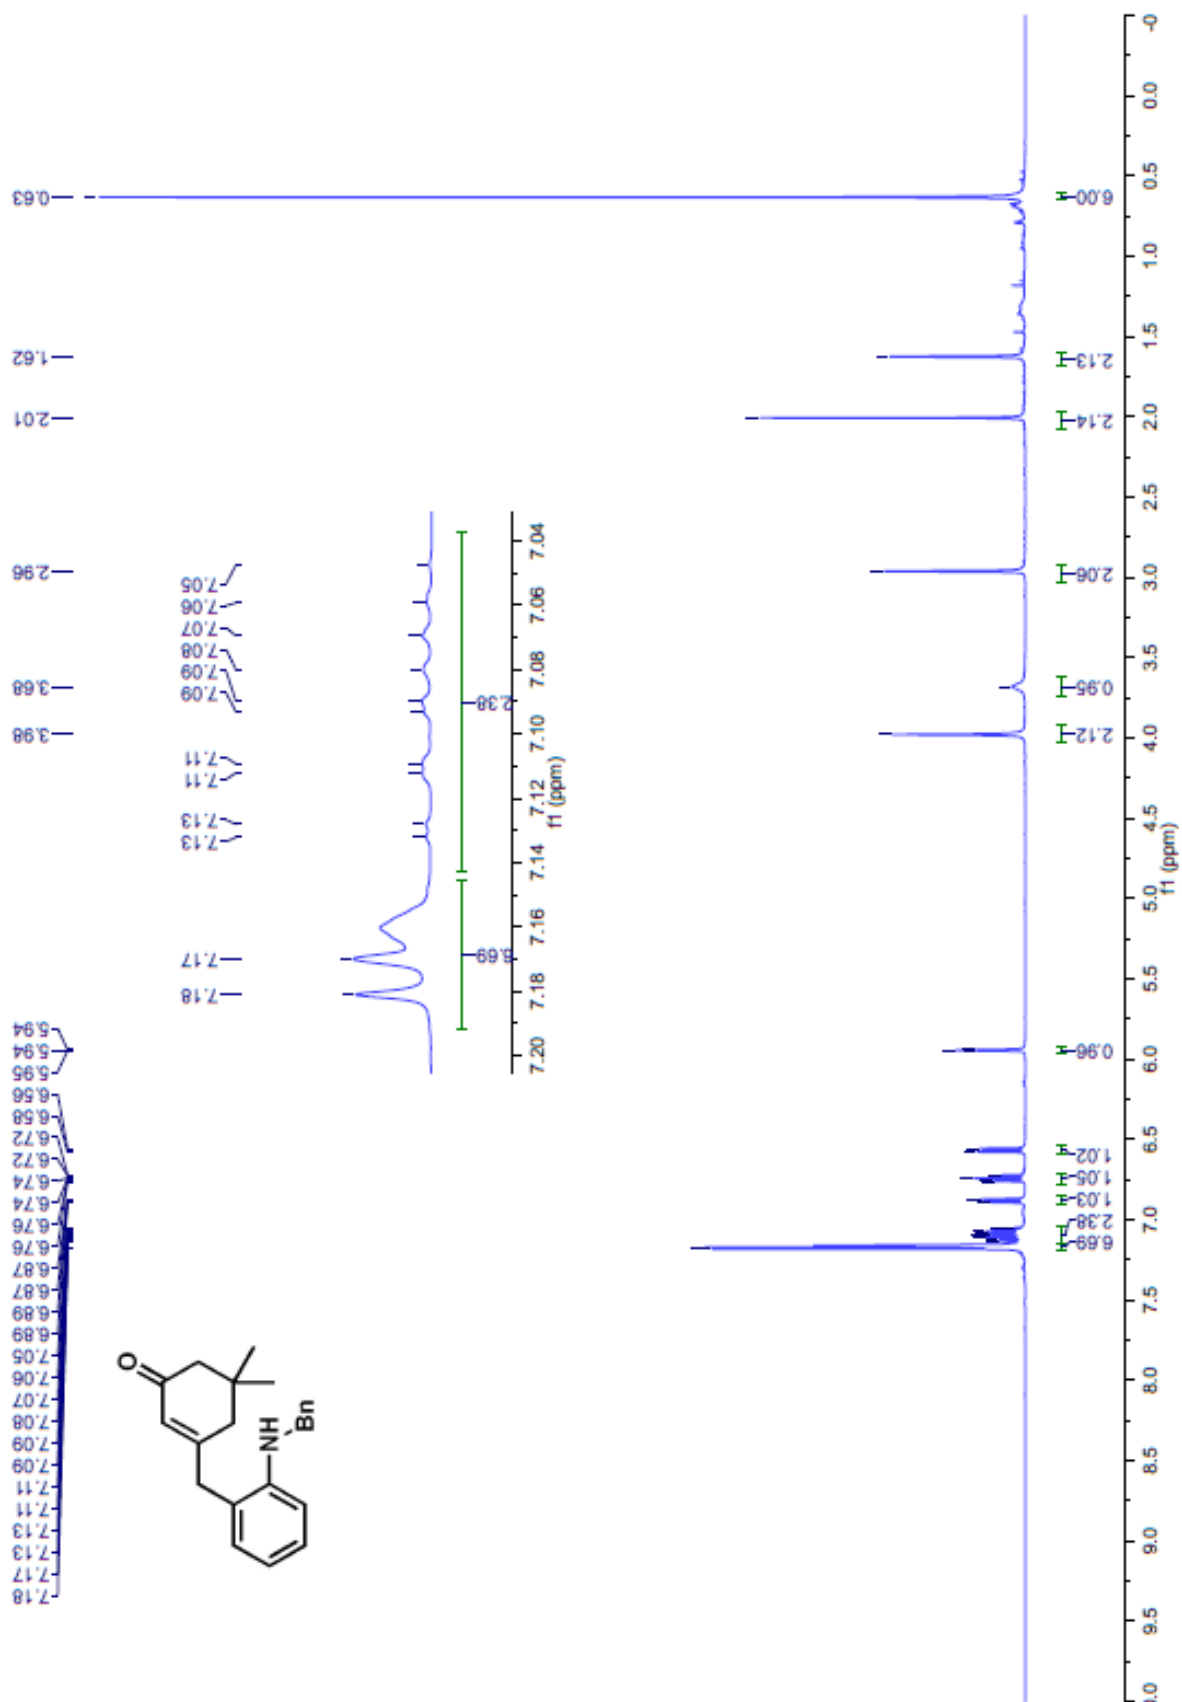

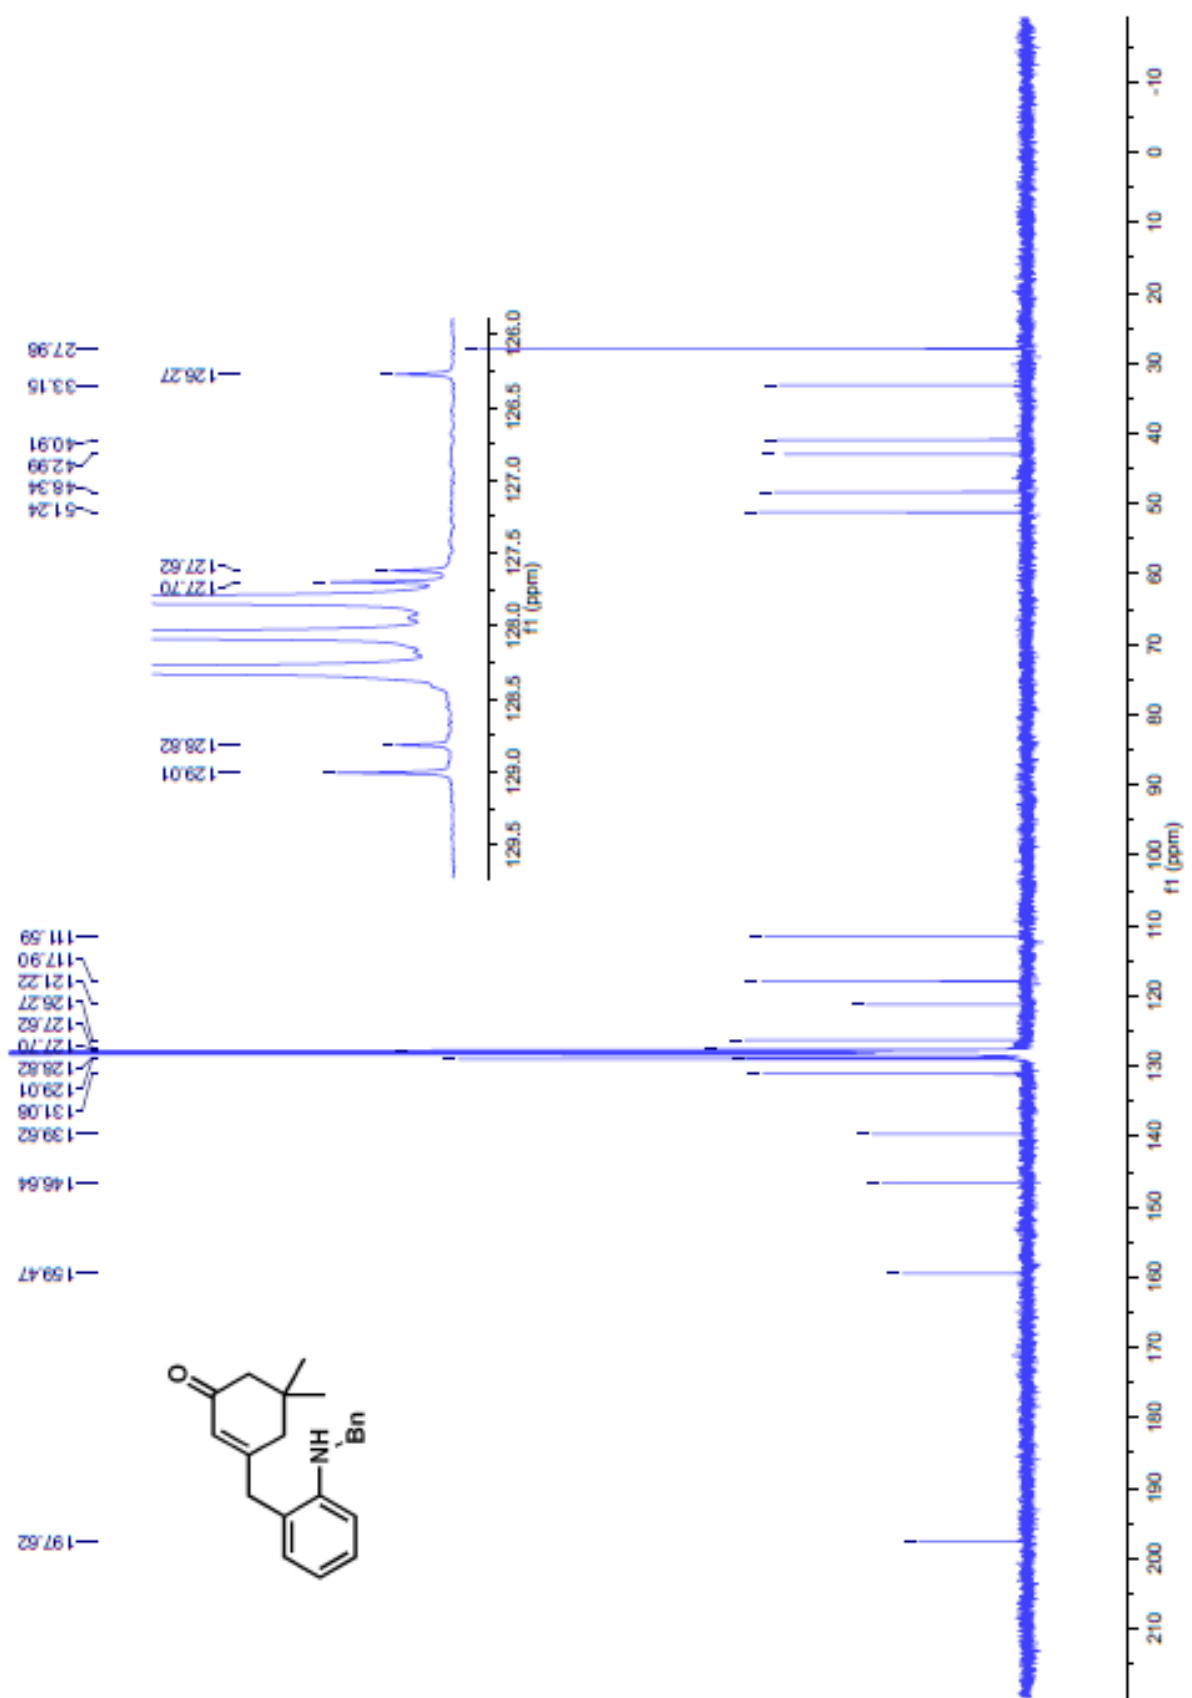

<sup>13</sup>C NMR (100 MHz, C<sub>6</sub>D<sub>6</sub>) of **3af**

<sup>1</sup>H NMR (400 MHz, CDCl<sub>3</sub>) of **3ag**

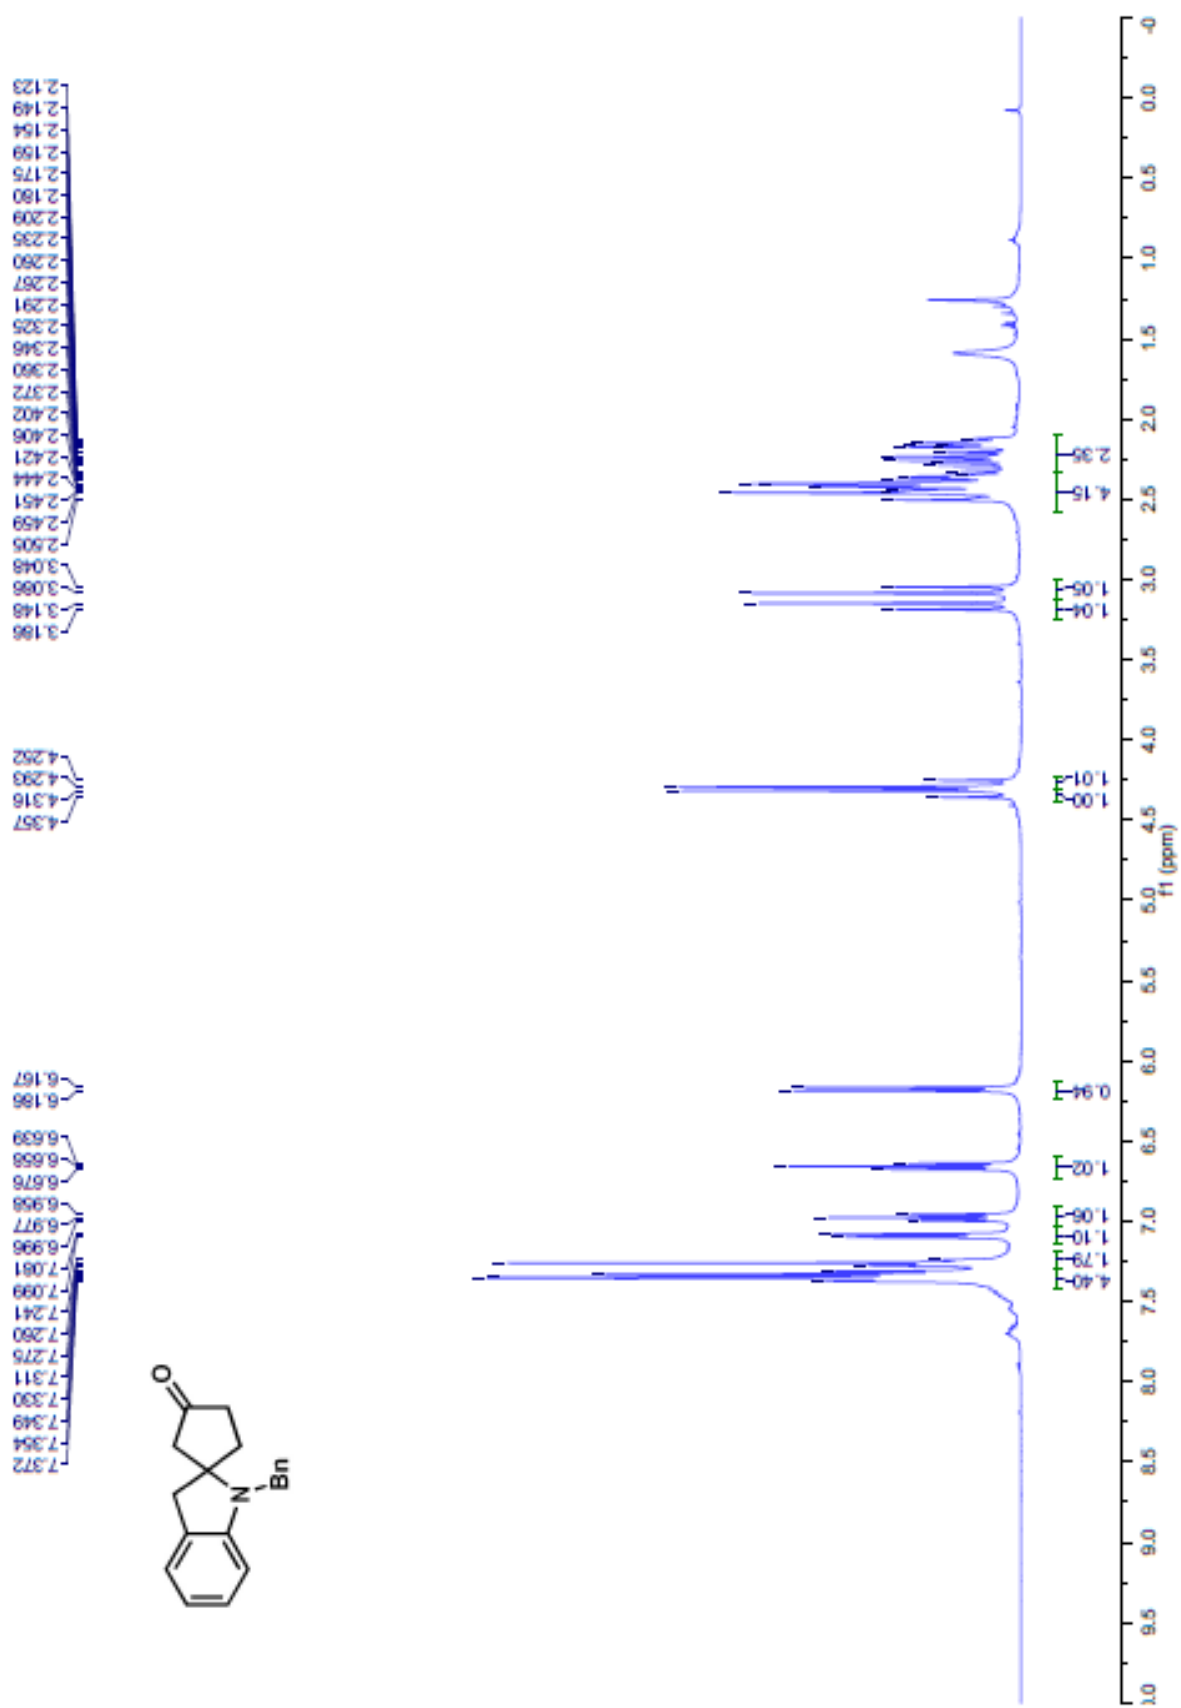

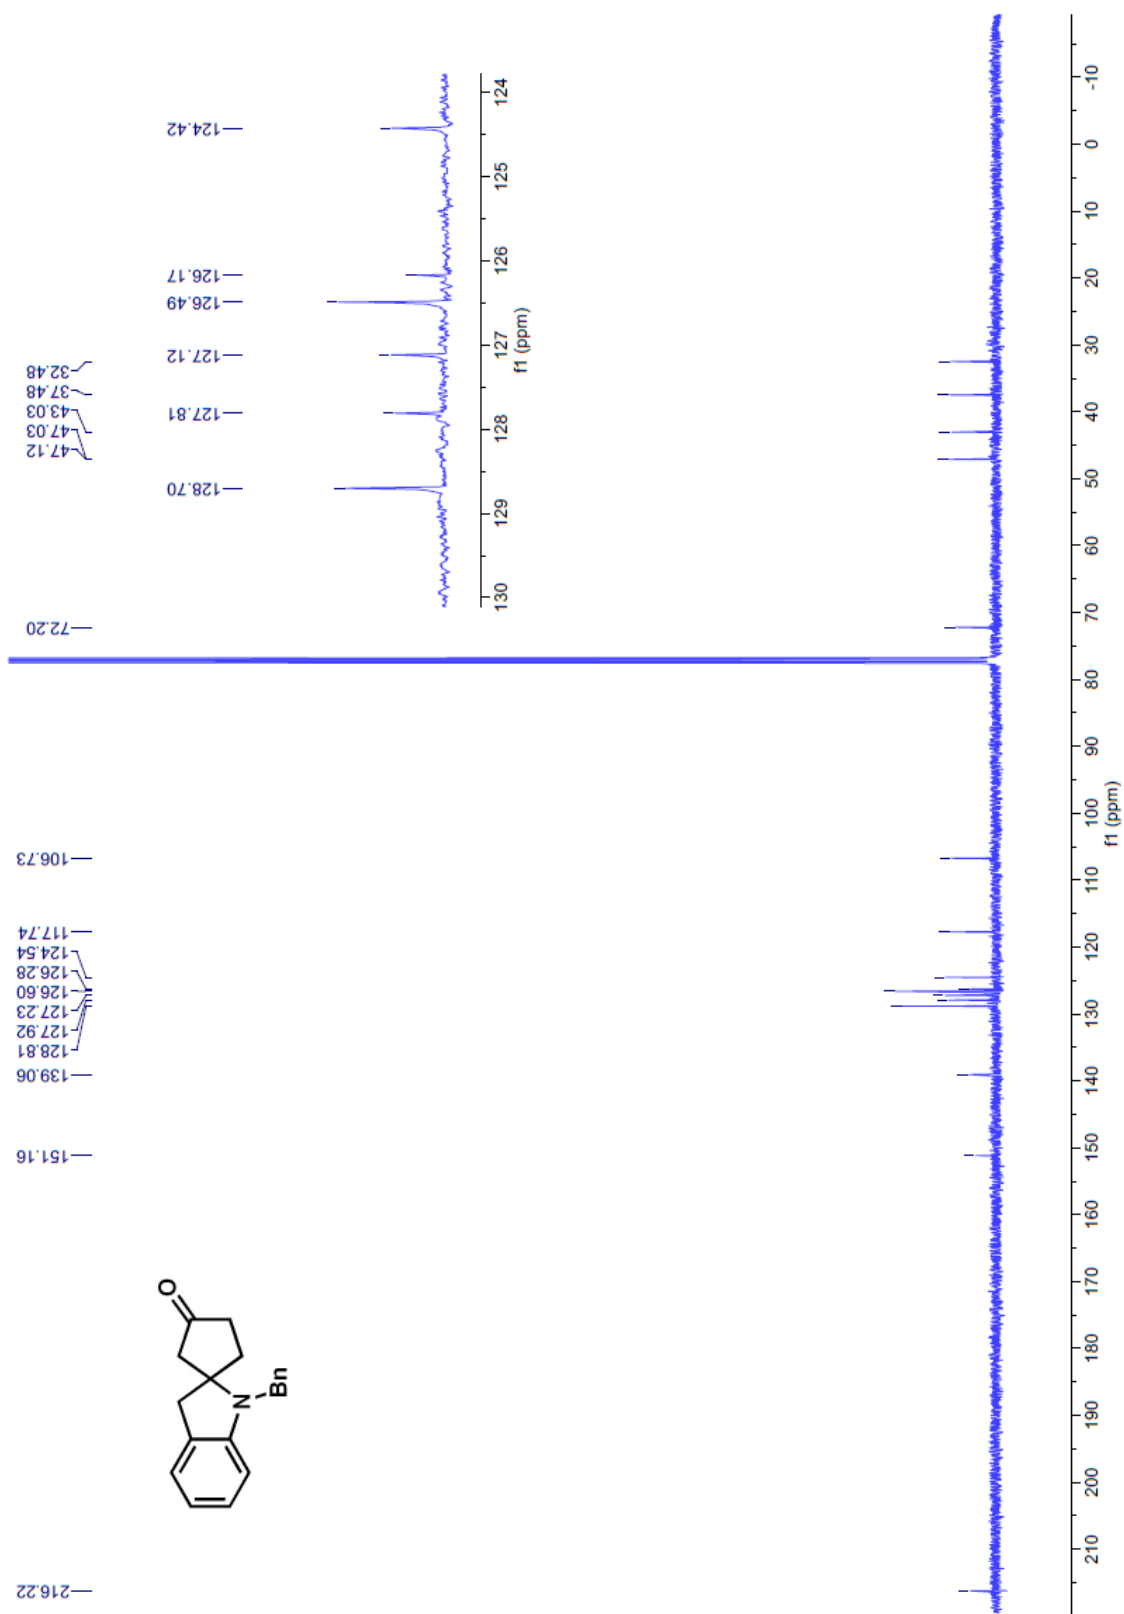



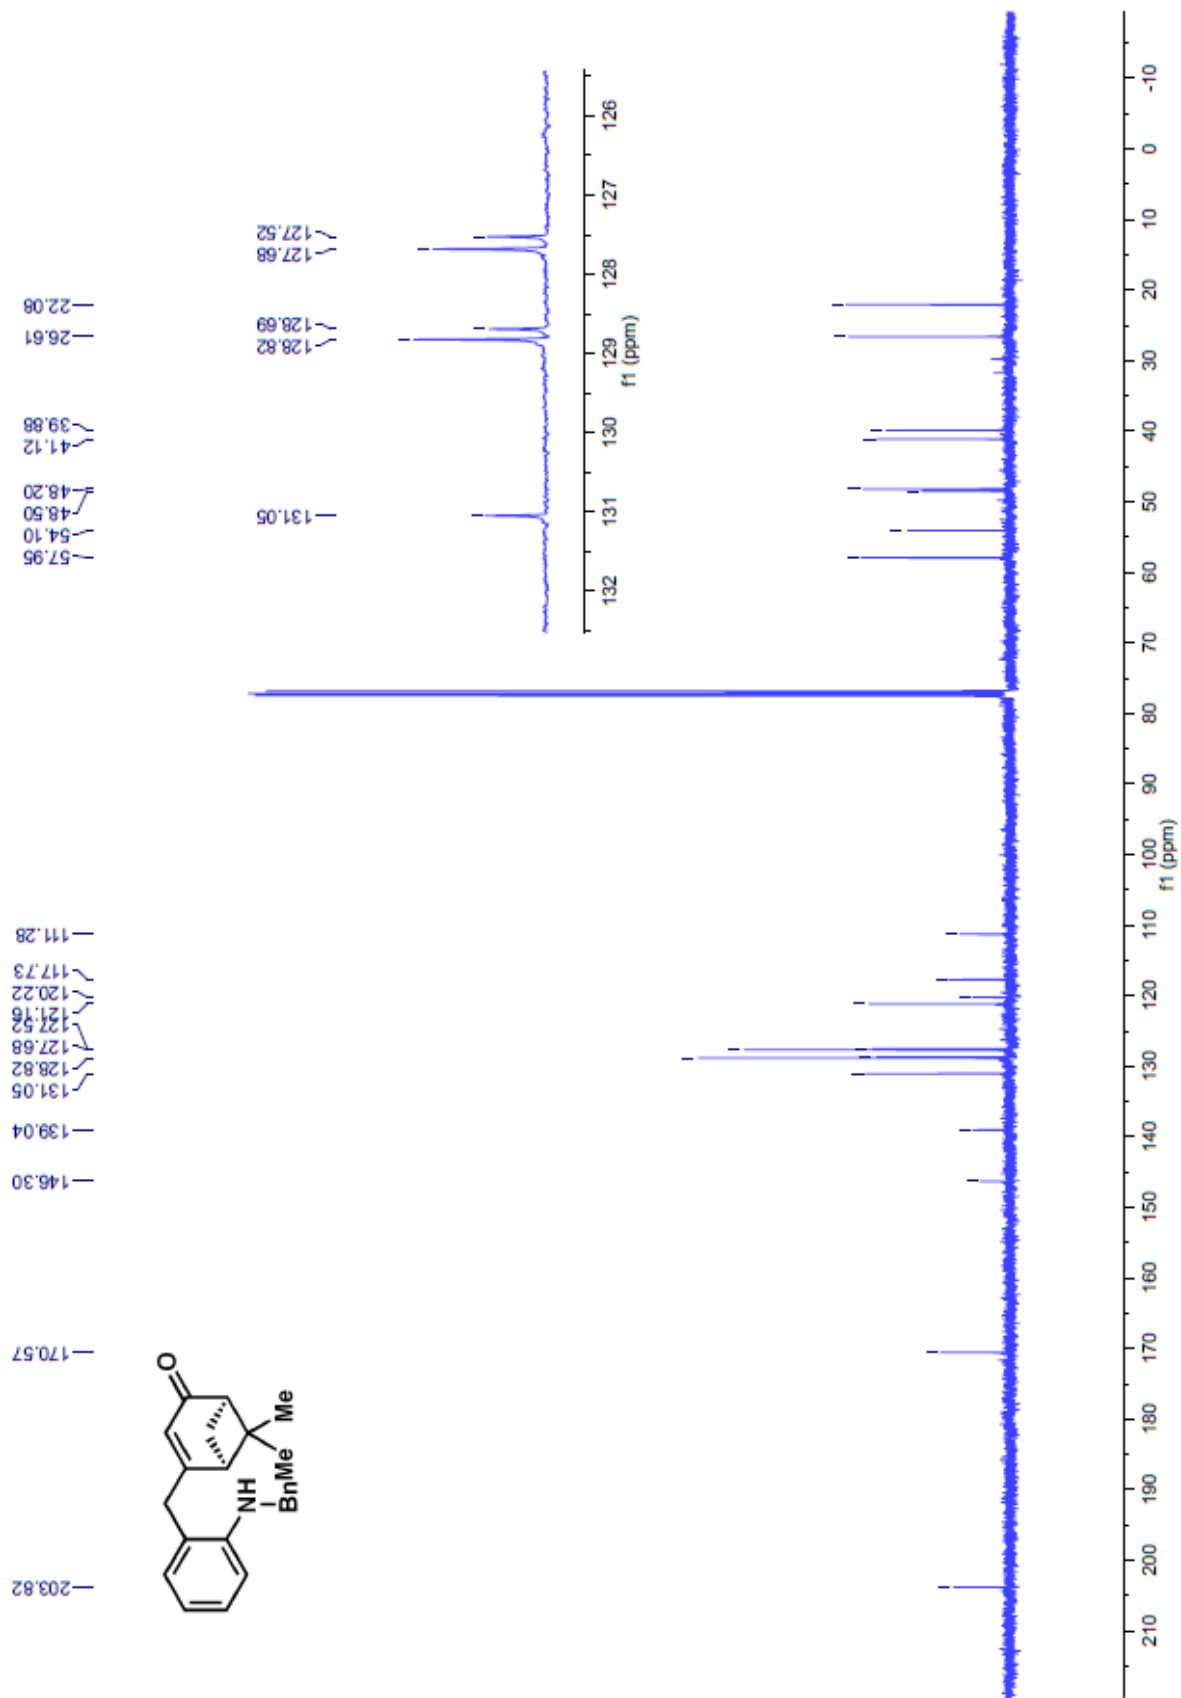

<sup>1</sup>H NMR (400 MHz, acetone-d<sub>6</sub>) of **6a**

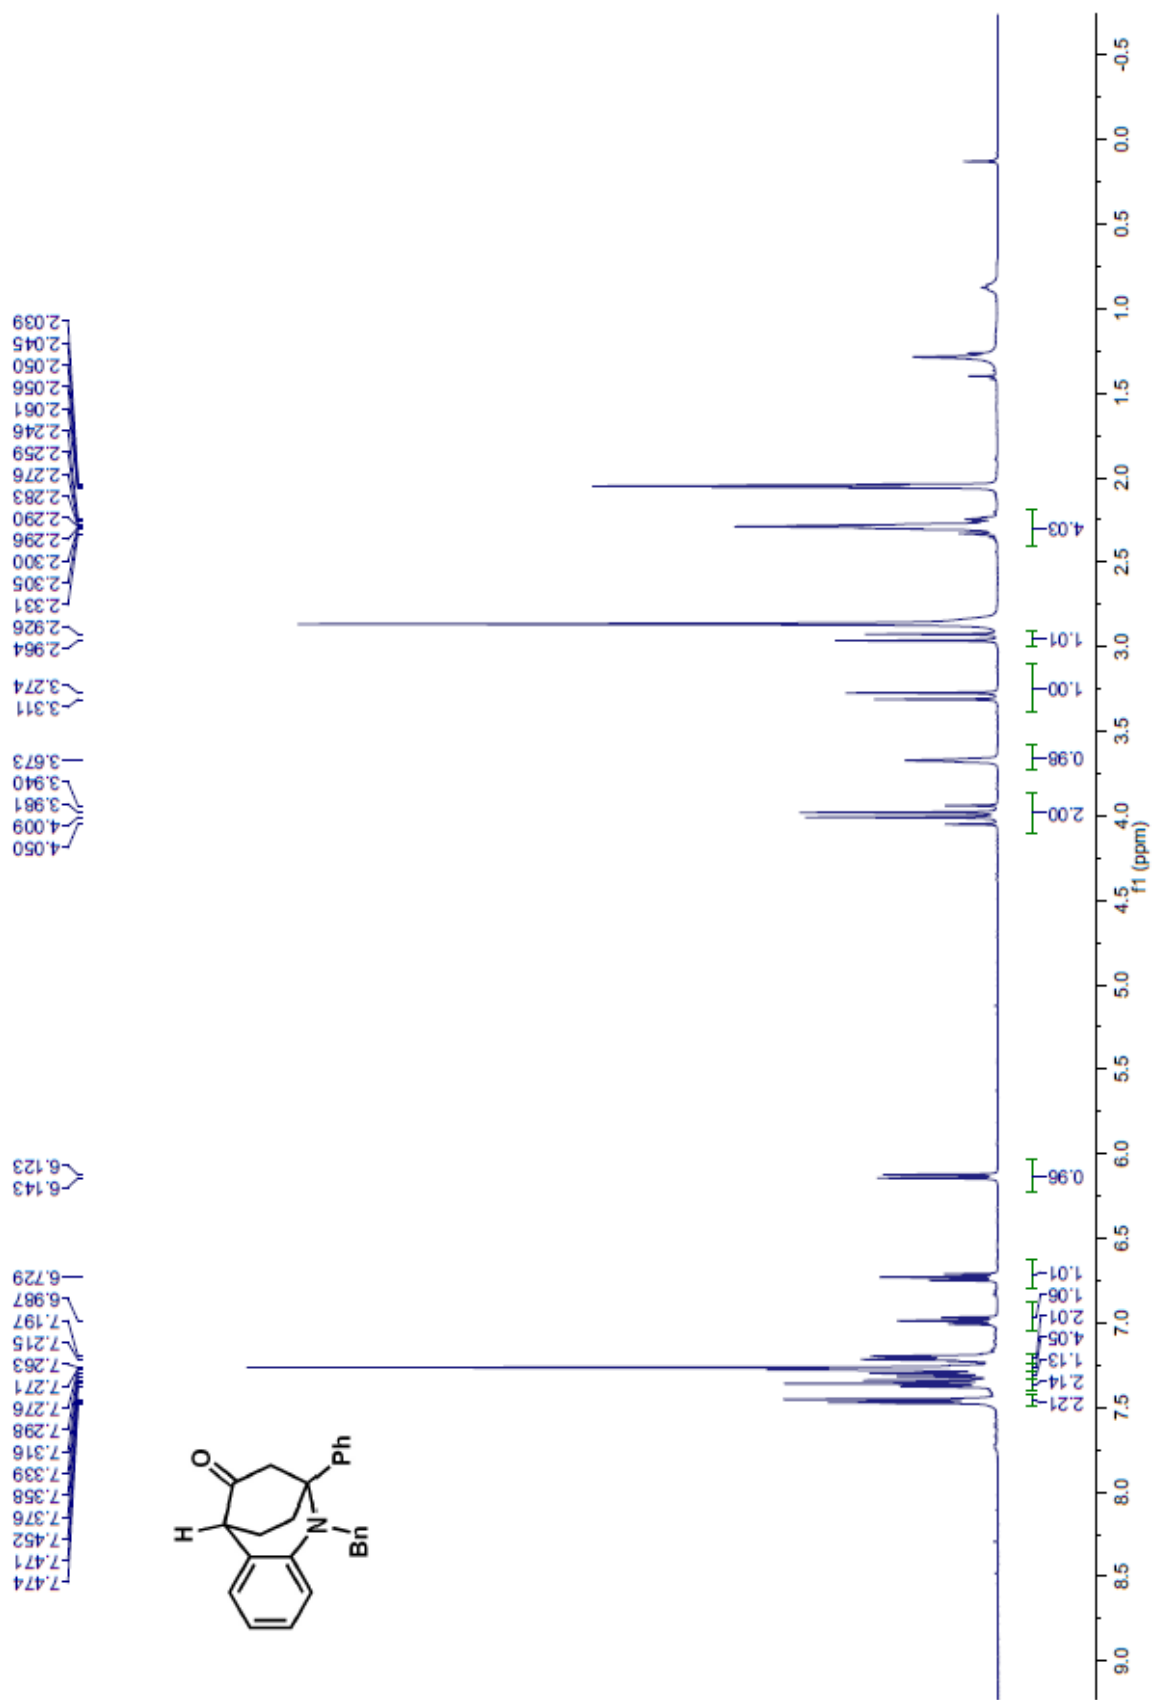

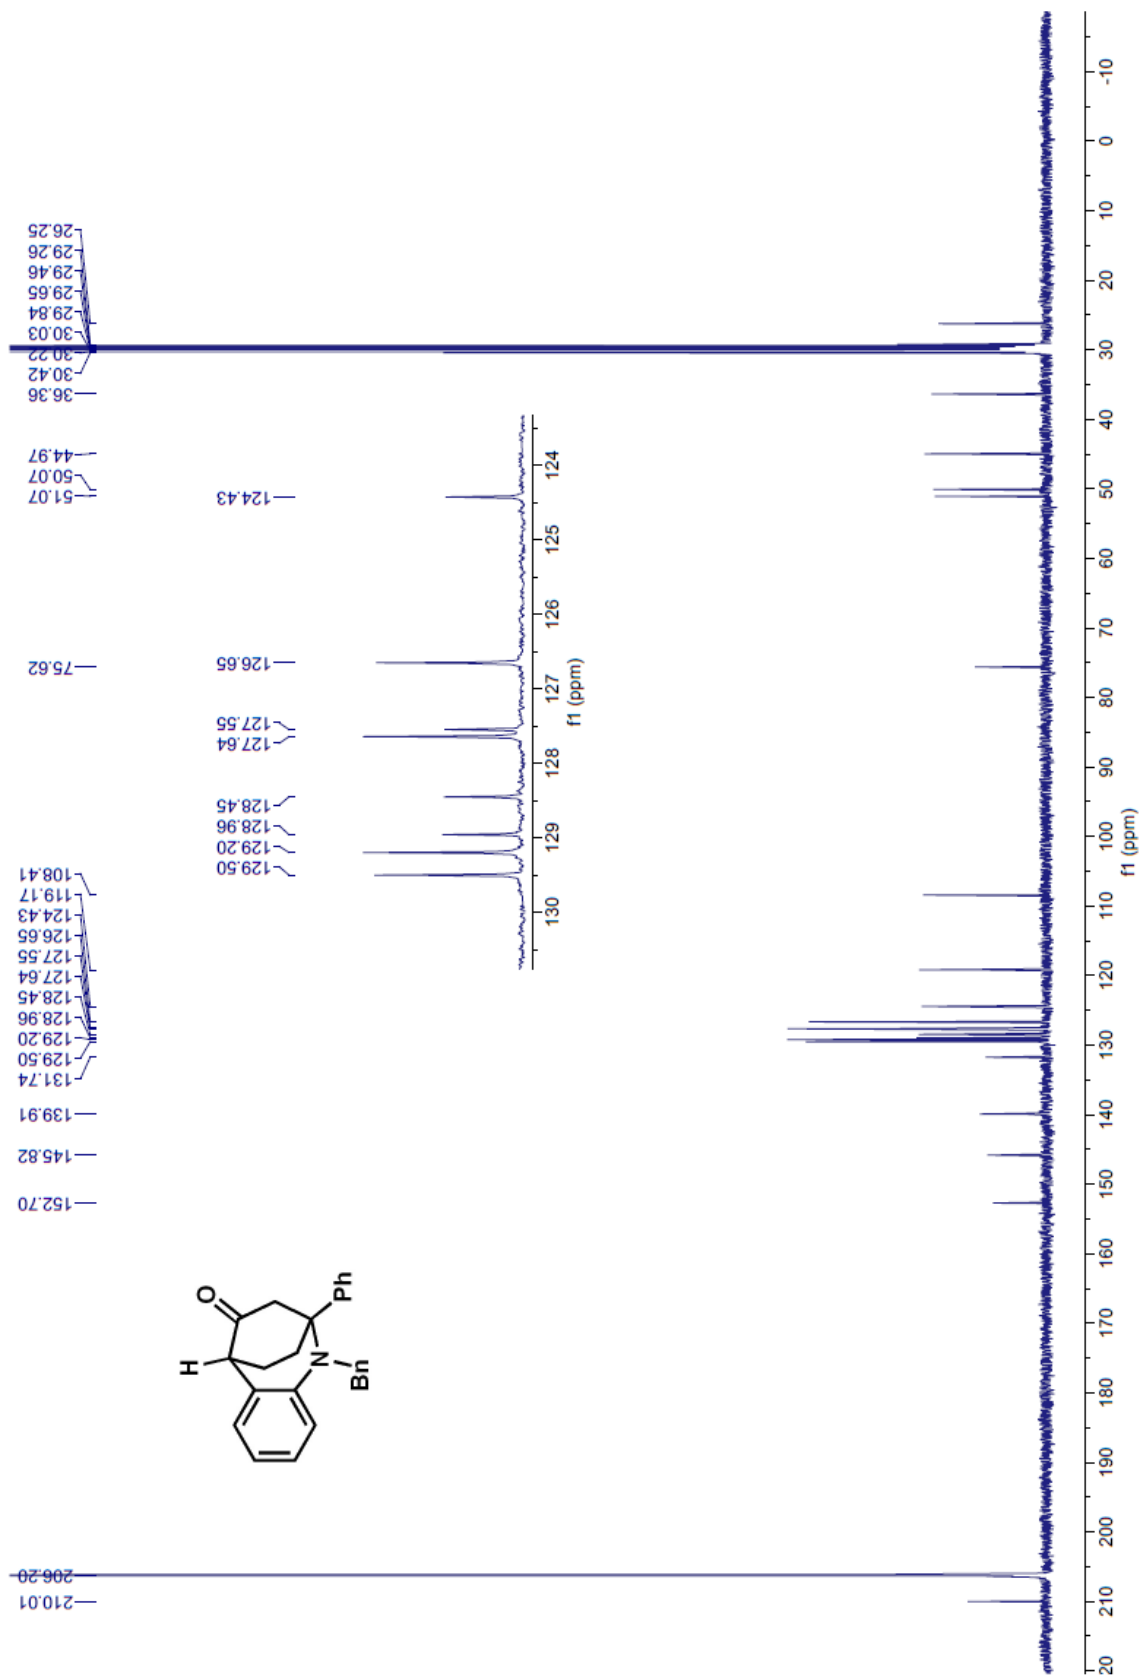



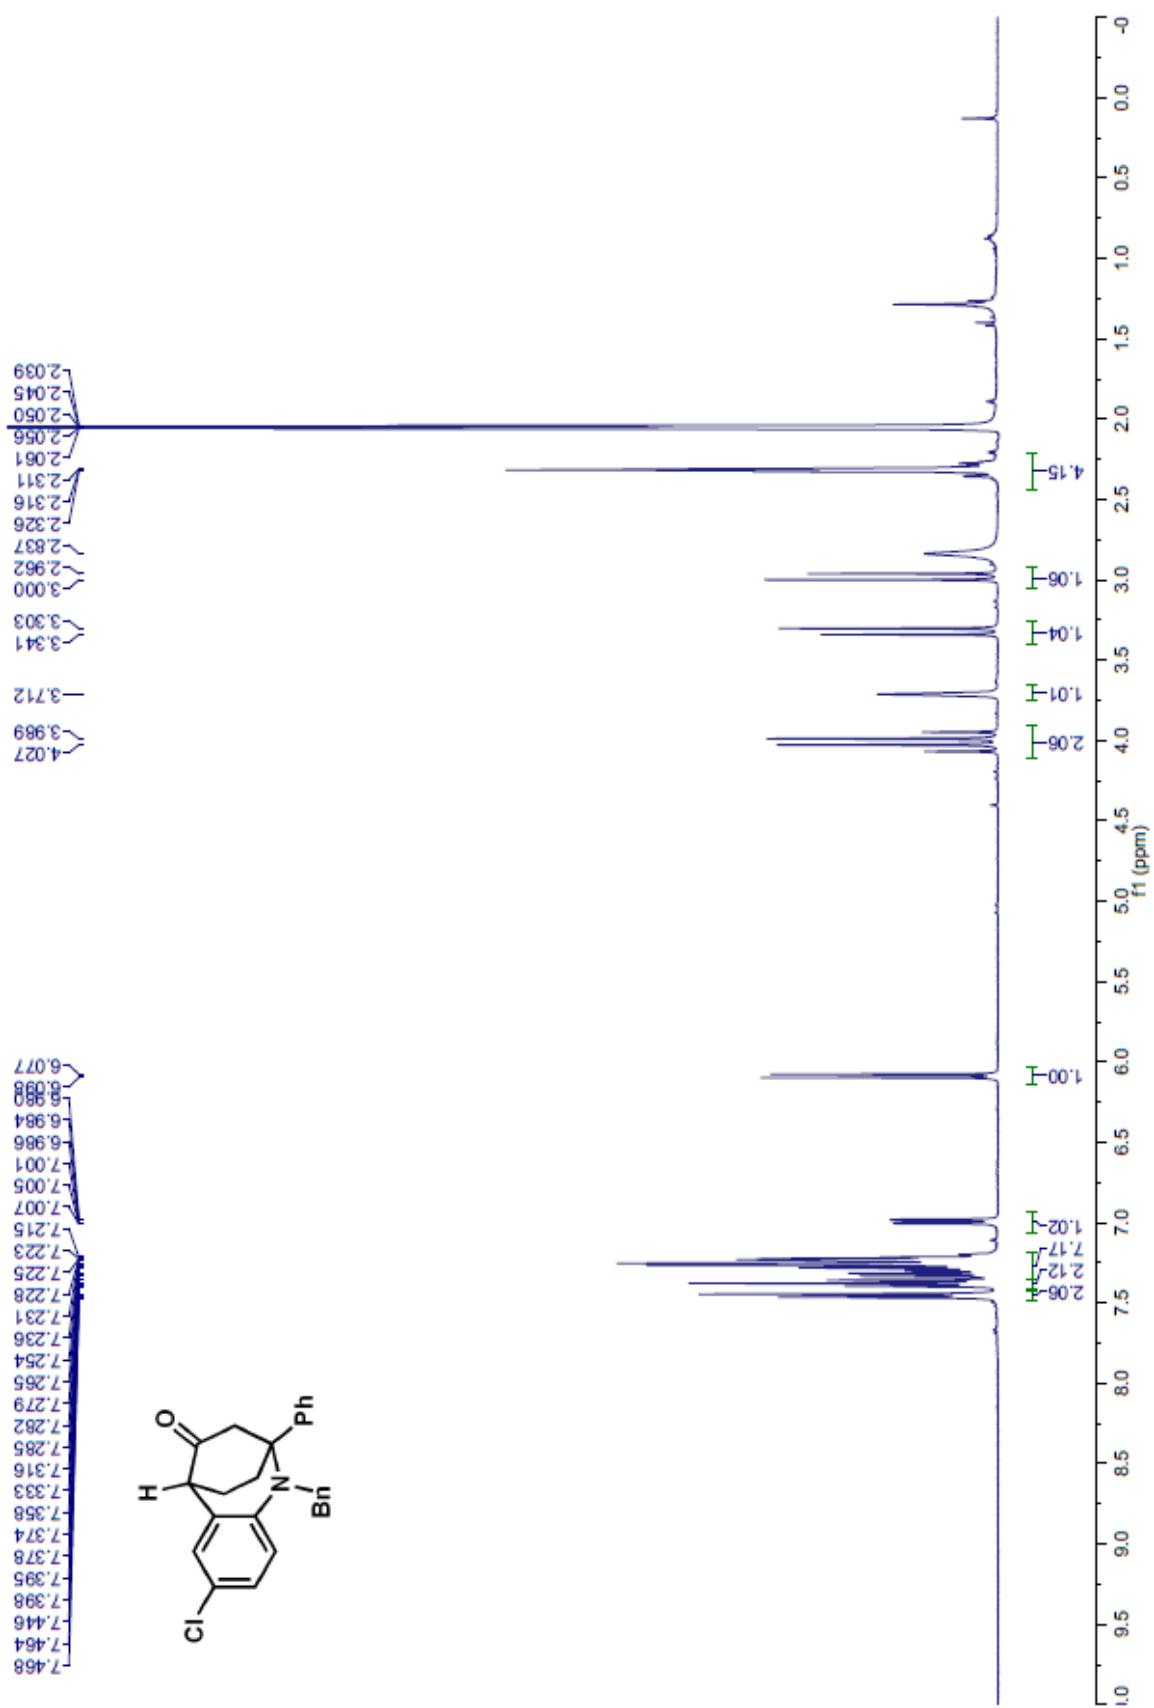

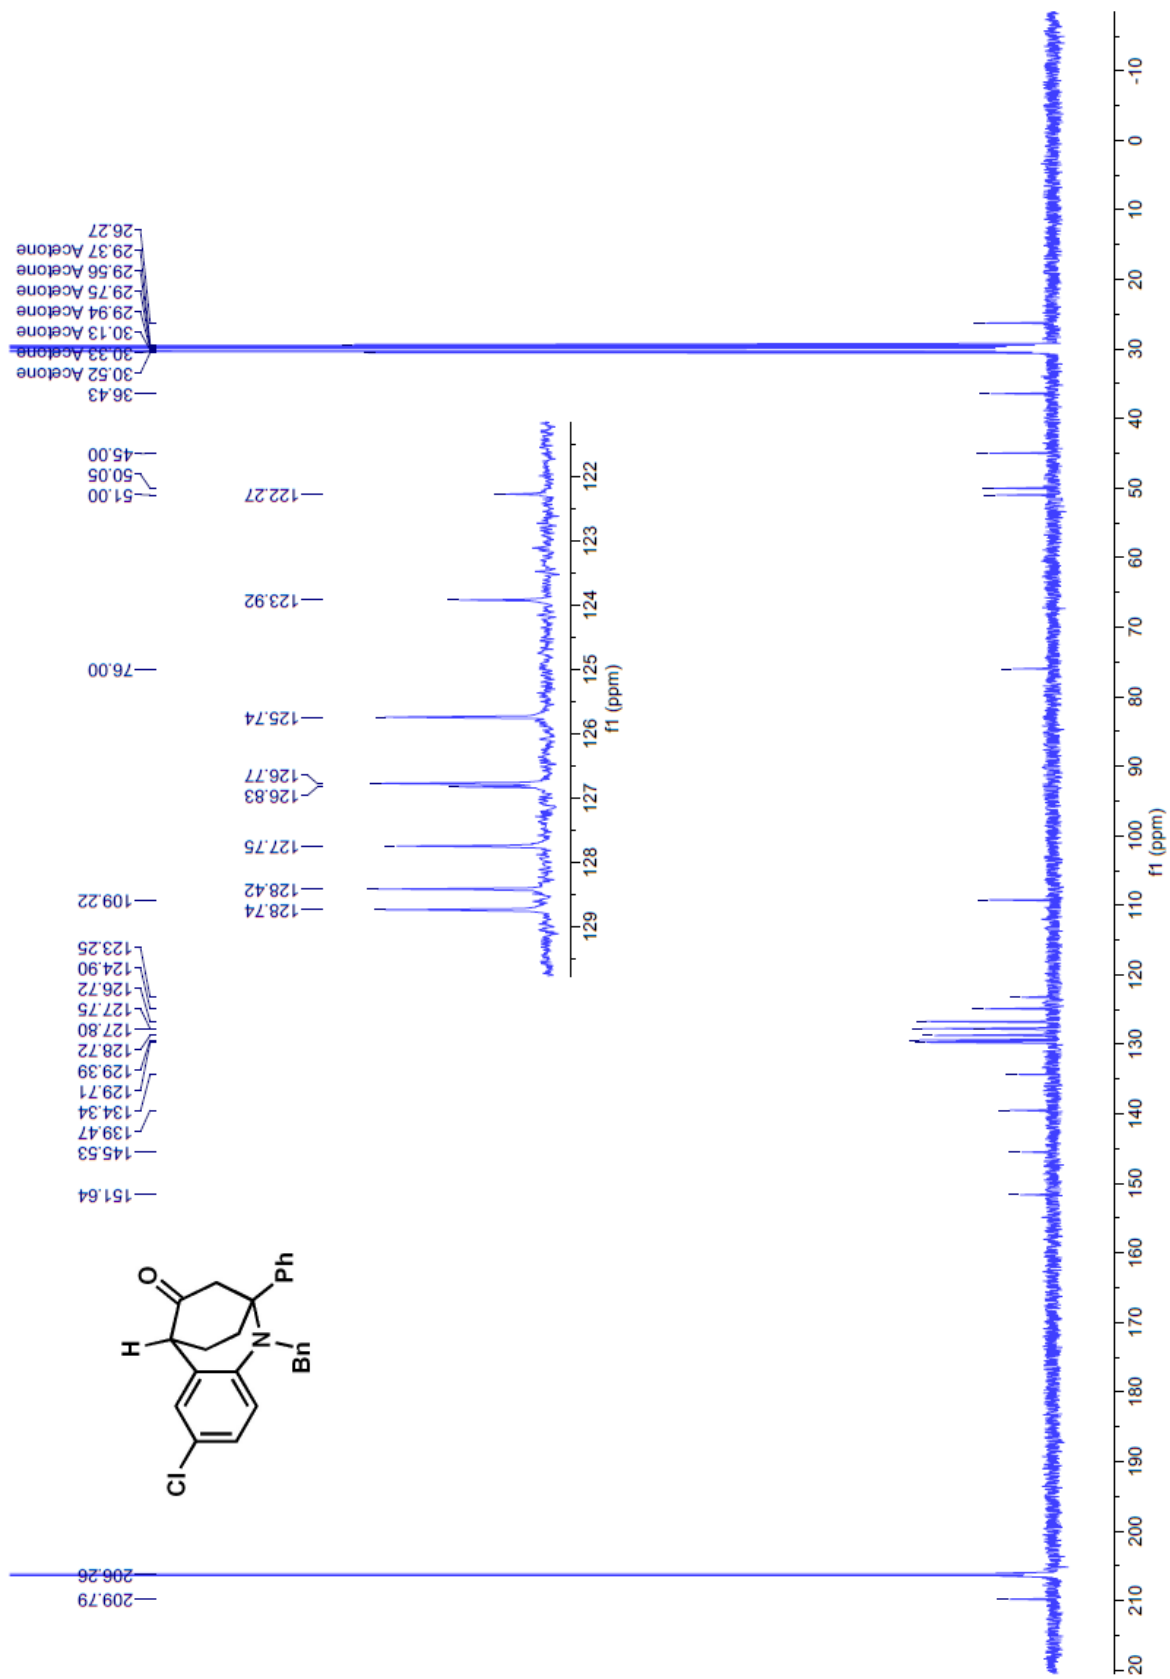





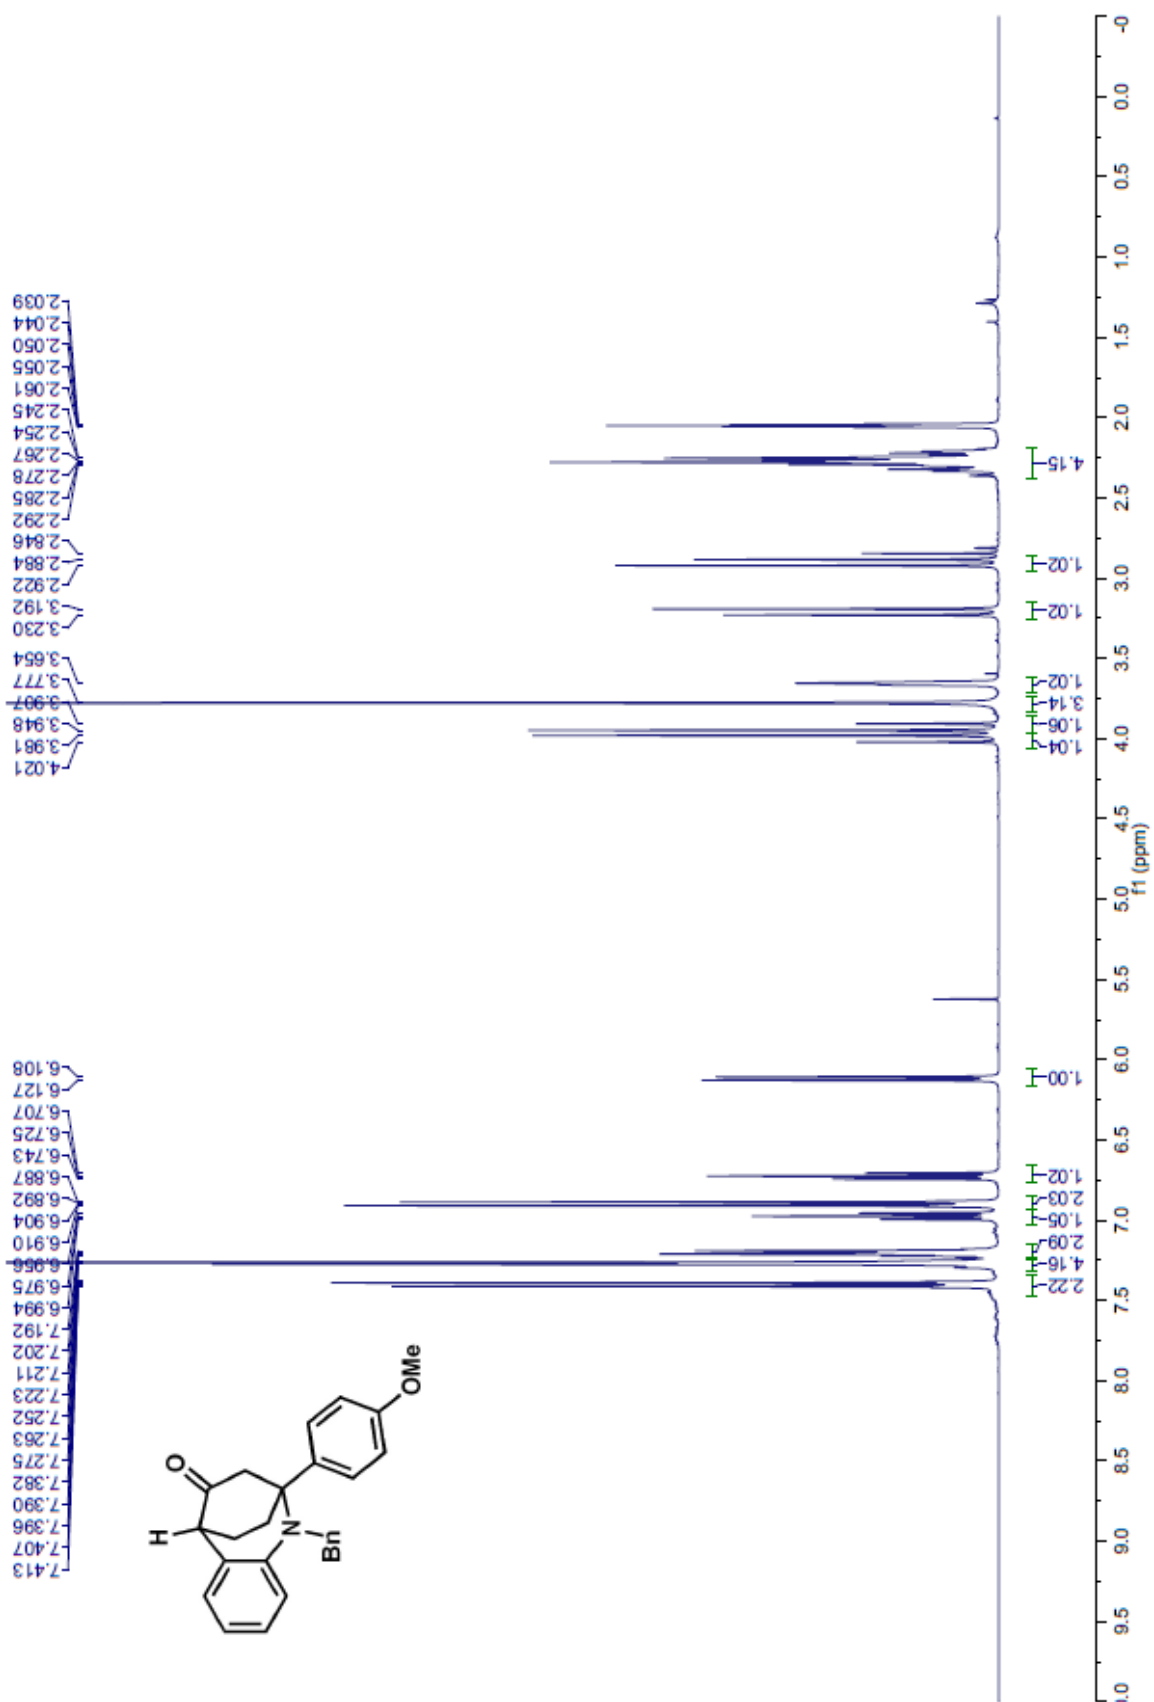

<sup>1</sup>H NMR (400 MHz, acetone-*d*<sub>6</sub>) of **6d**

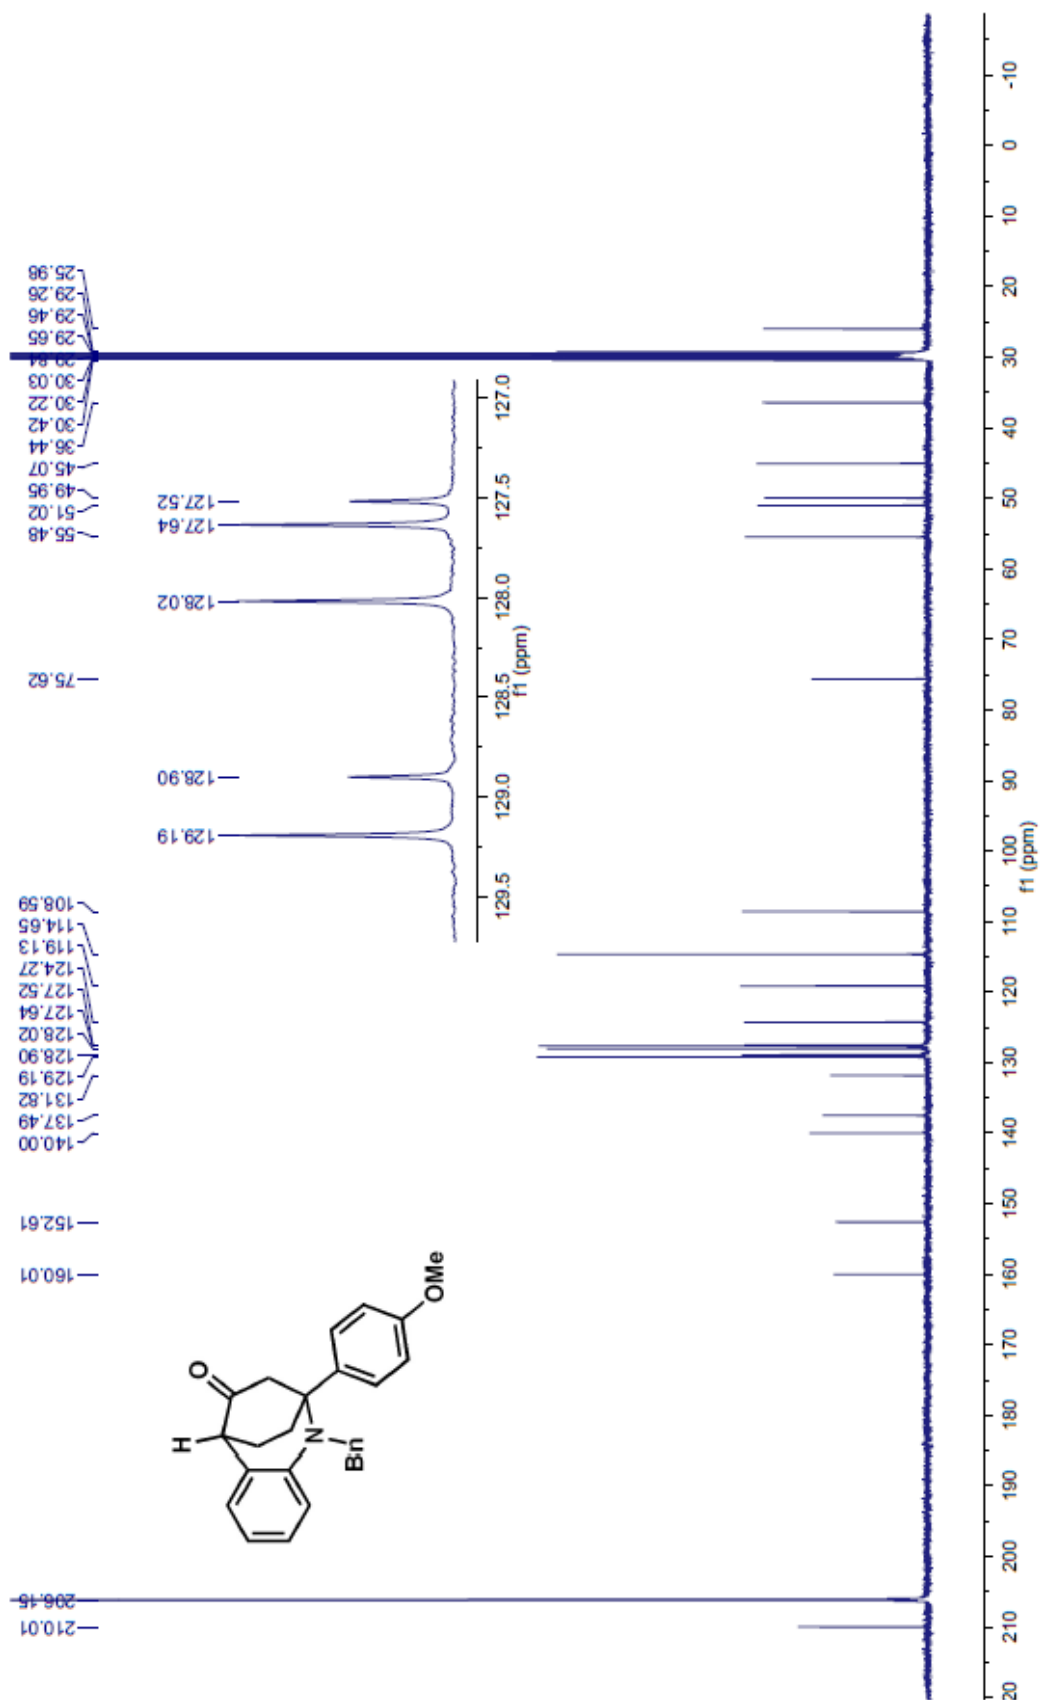

<sup>13</sup>C NMR (100 MHz, acetone-*d*<sub>6</sub>) of **6d**

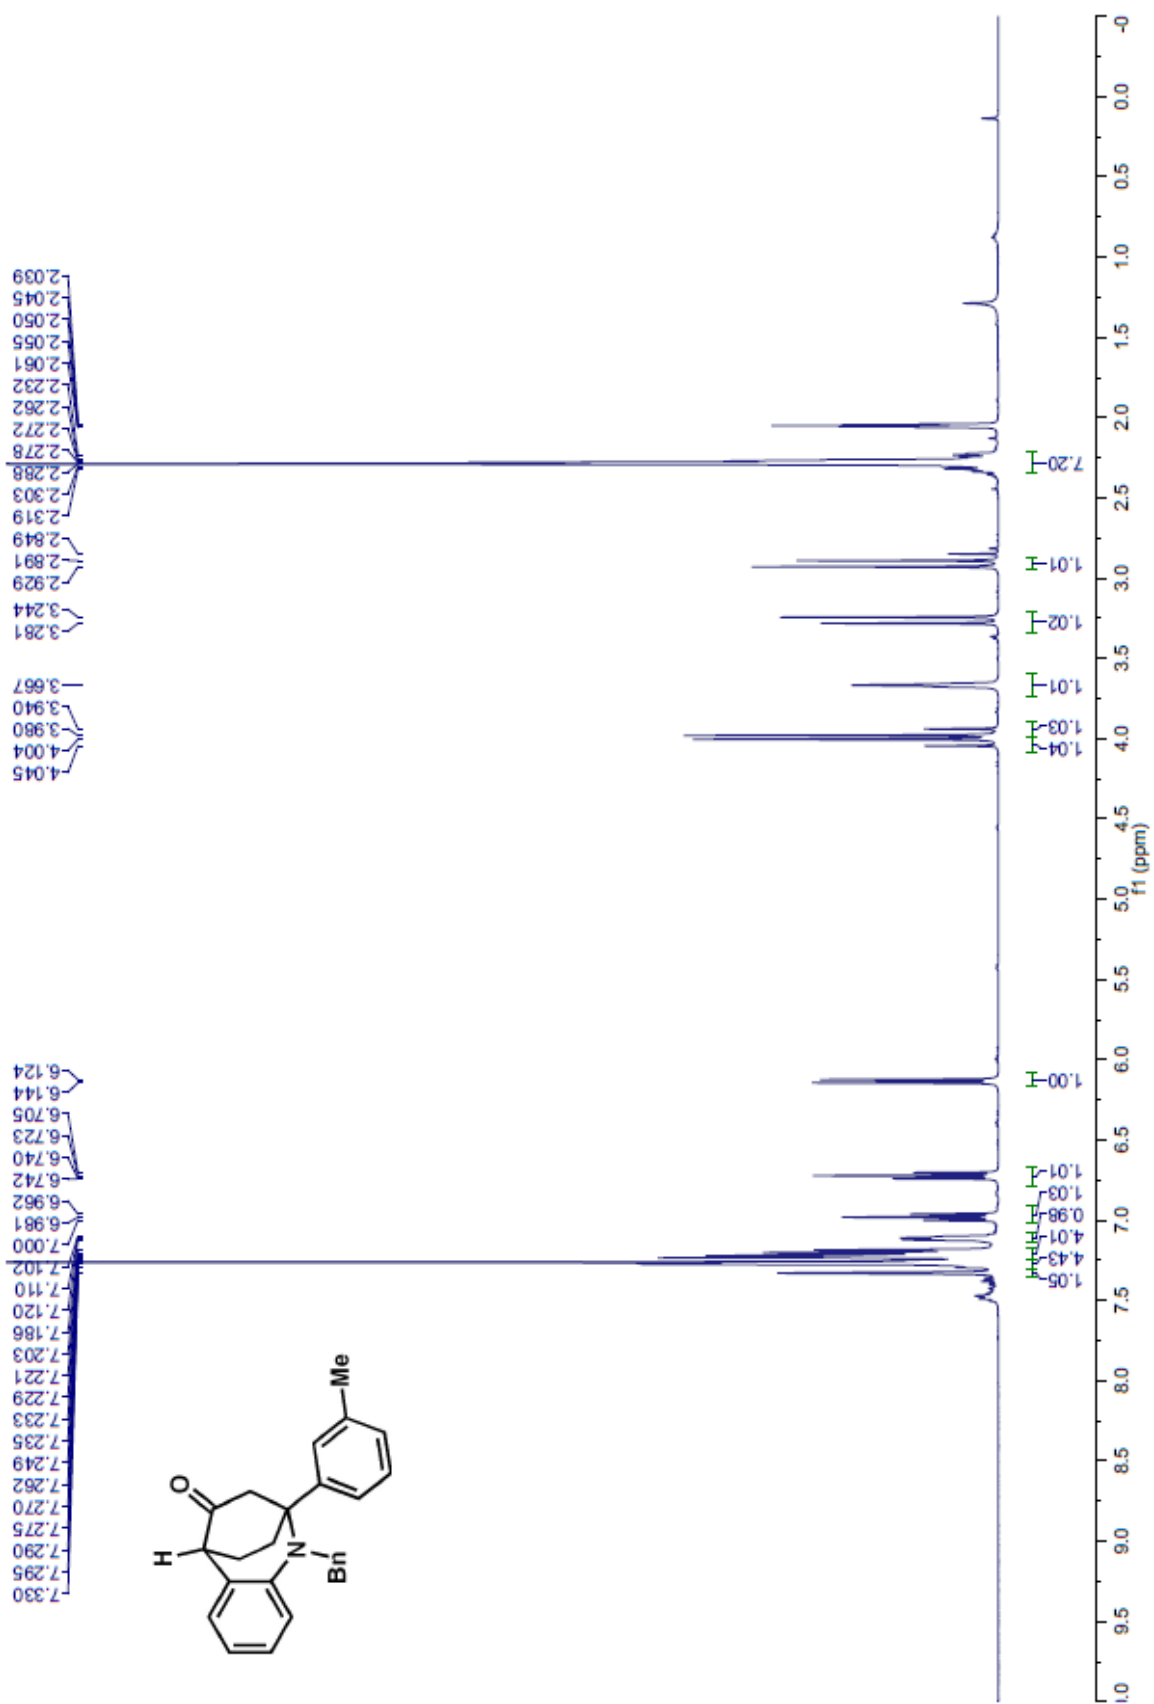

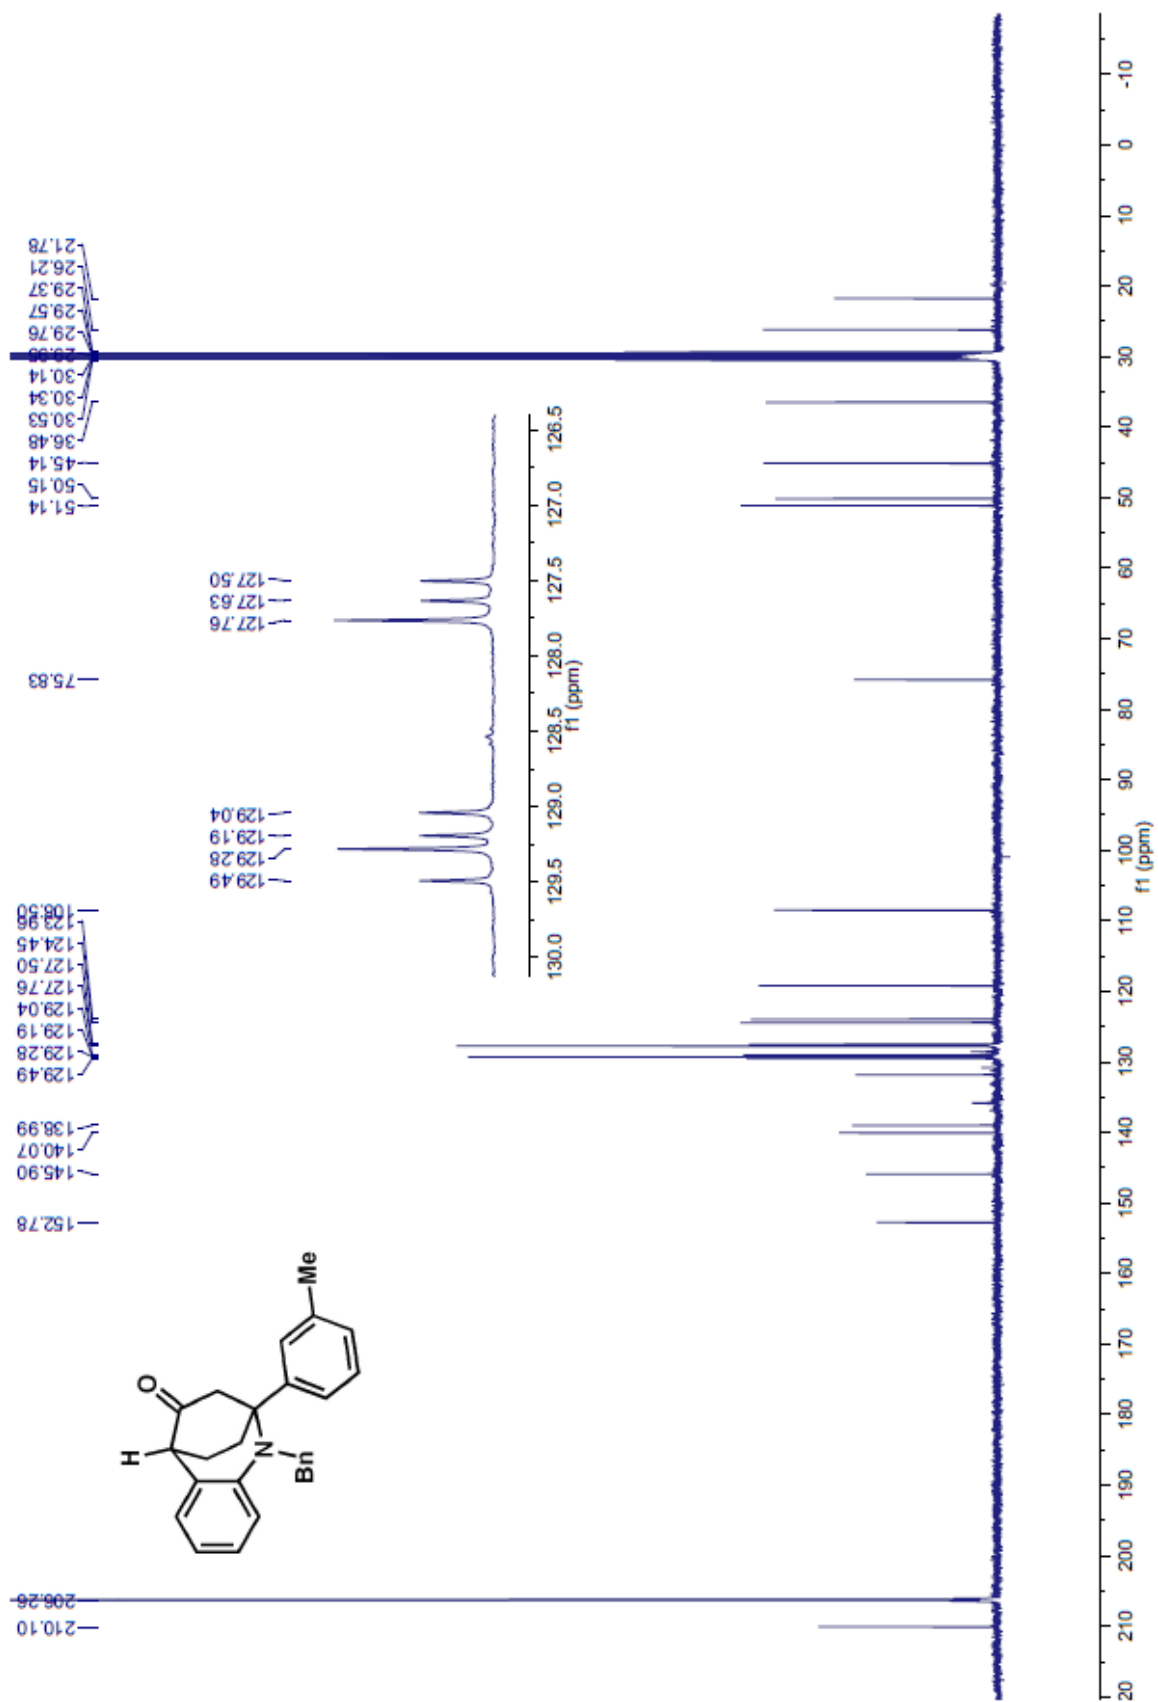

<sup>13</sup>C NMR (100 MHz, acetone-*d*<sub>6</sub>) of **6e**



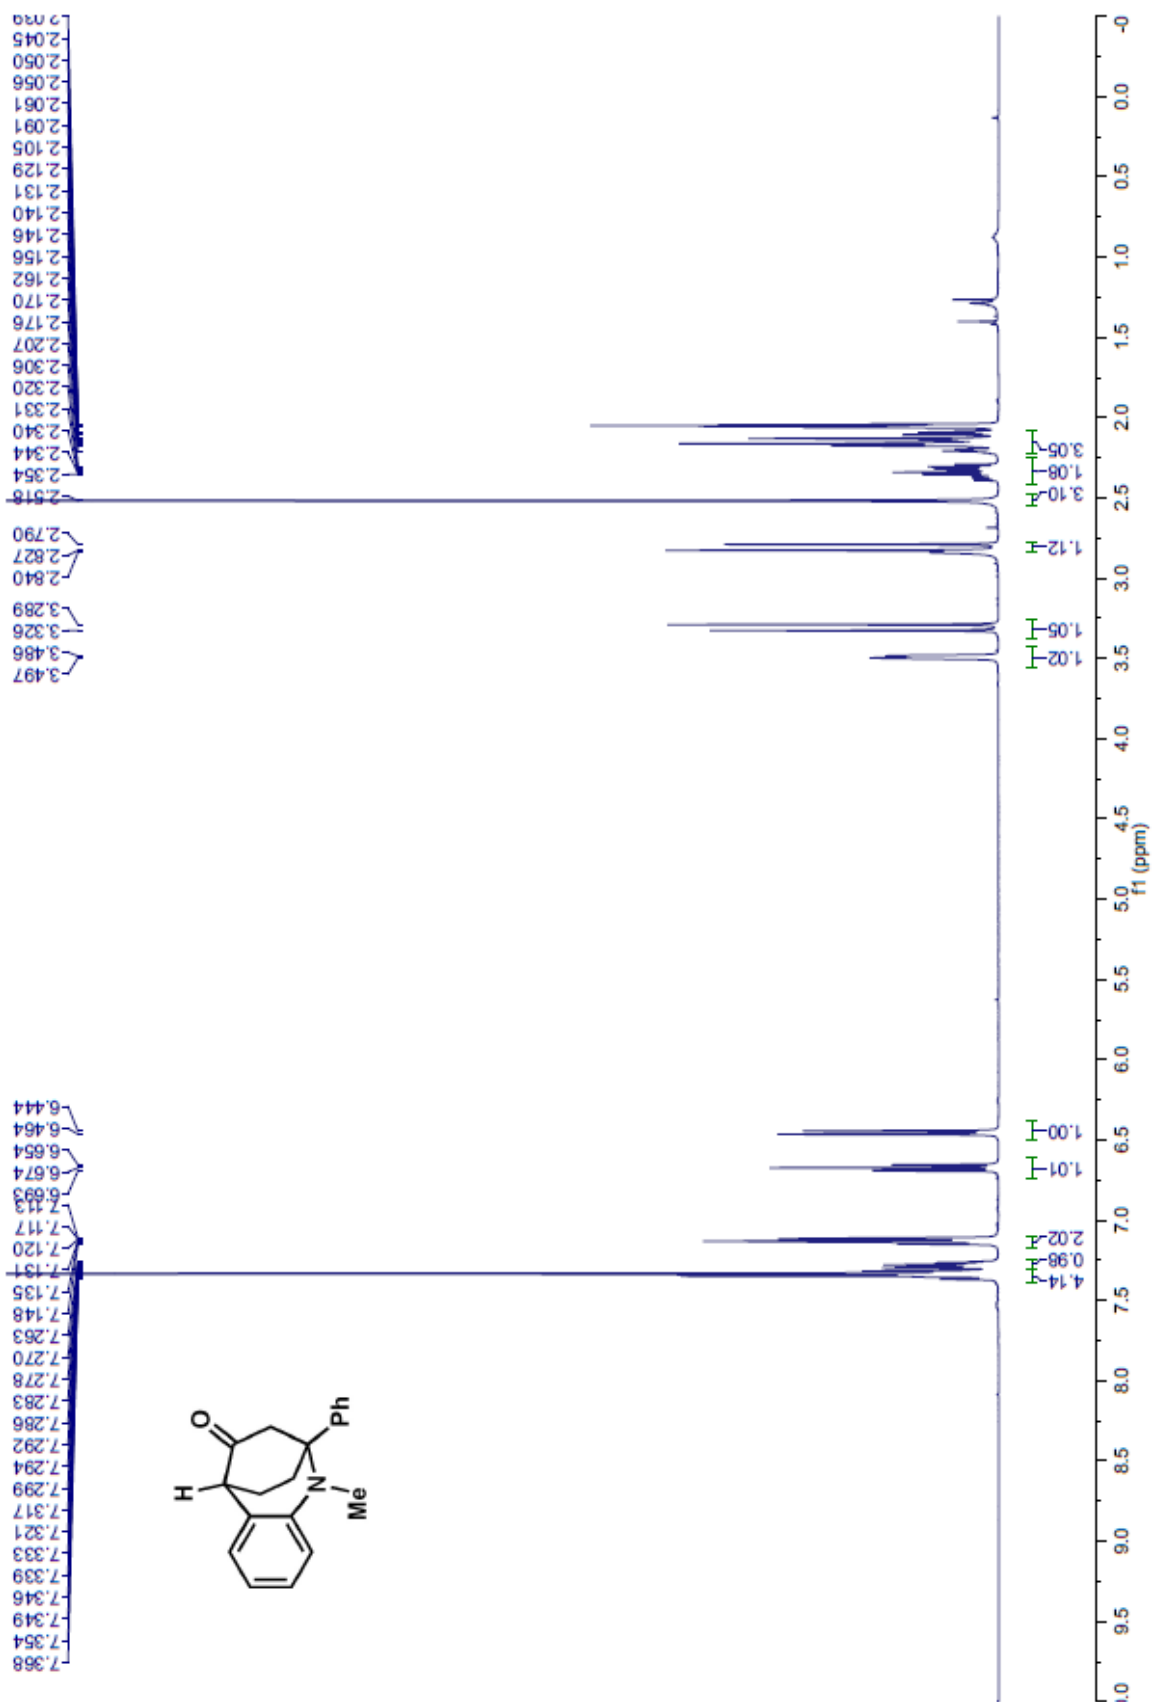

<sup>1</sup>H NMR (400 MHz, acetone-d<sub>6</sub>) of **6f**

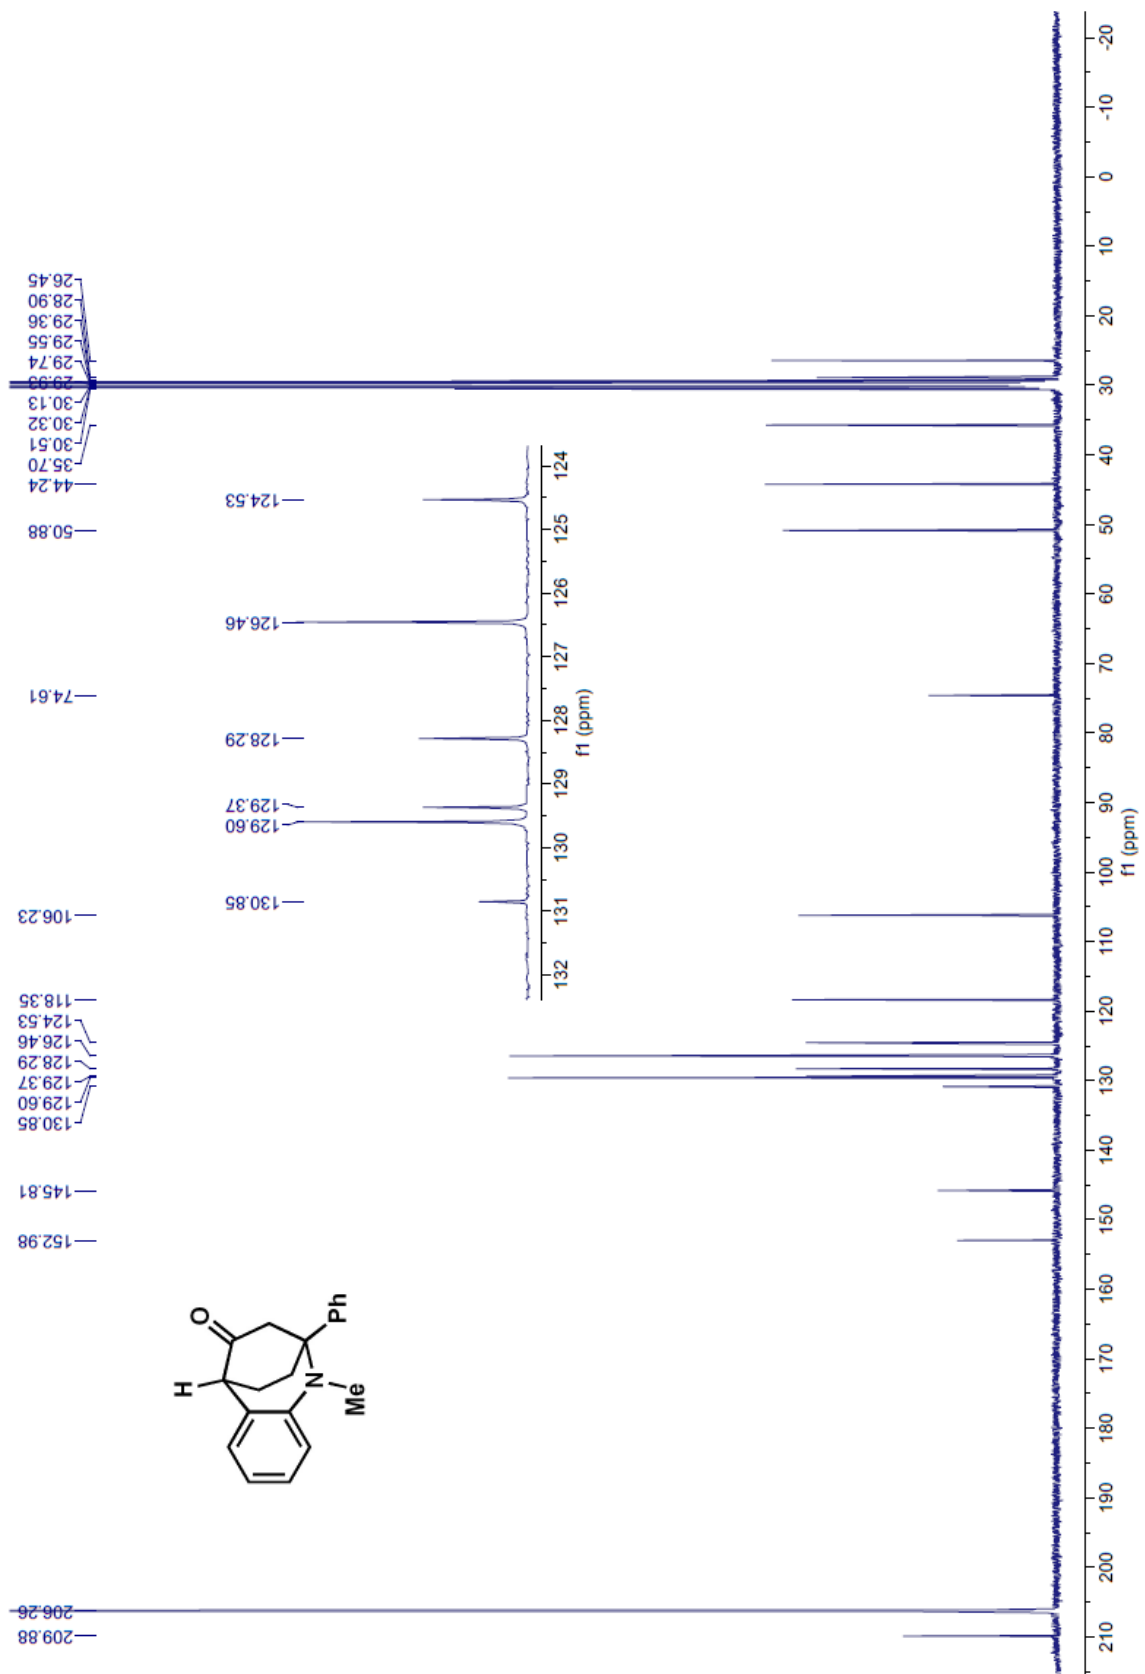

<sup>1</sup>H NMR (400 MHz, CDCl<sub>3</sub>) of **1b**

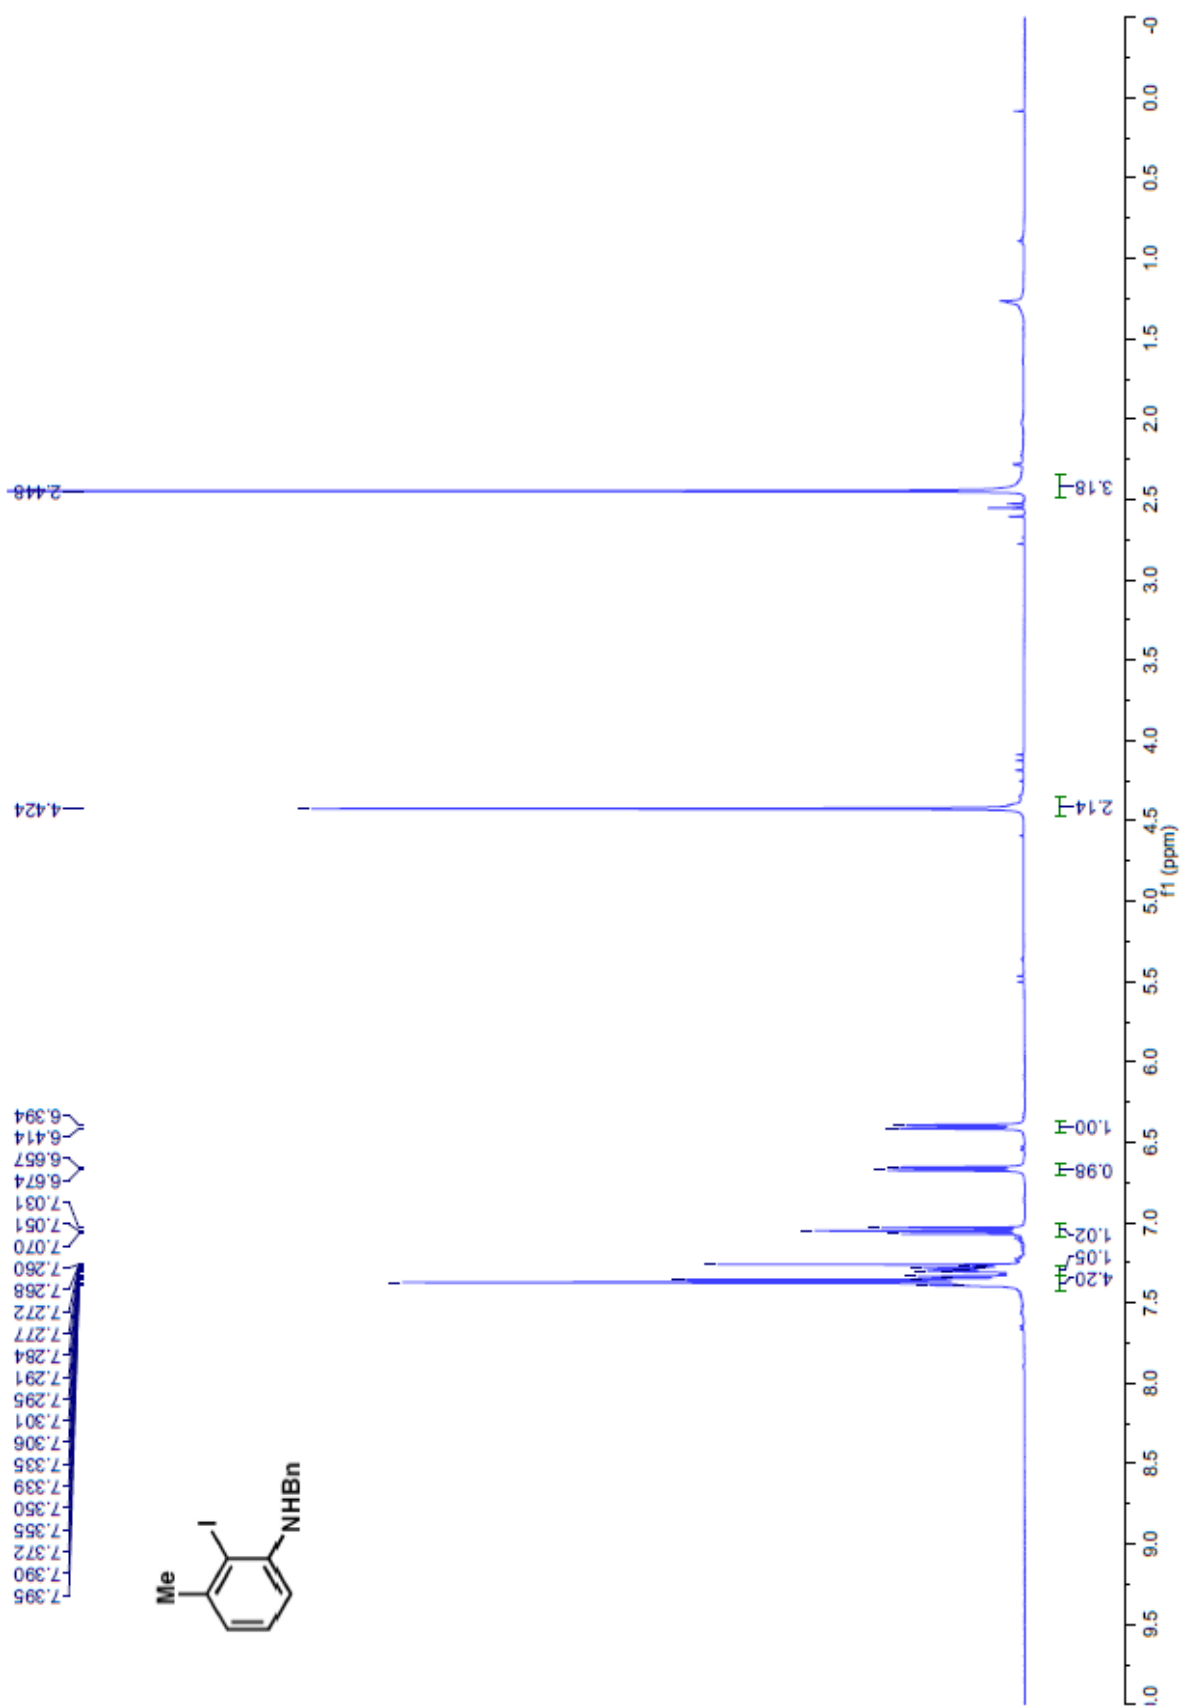

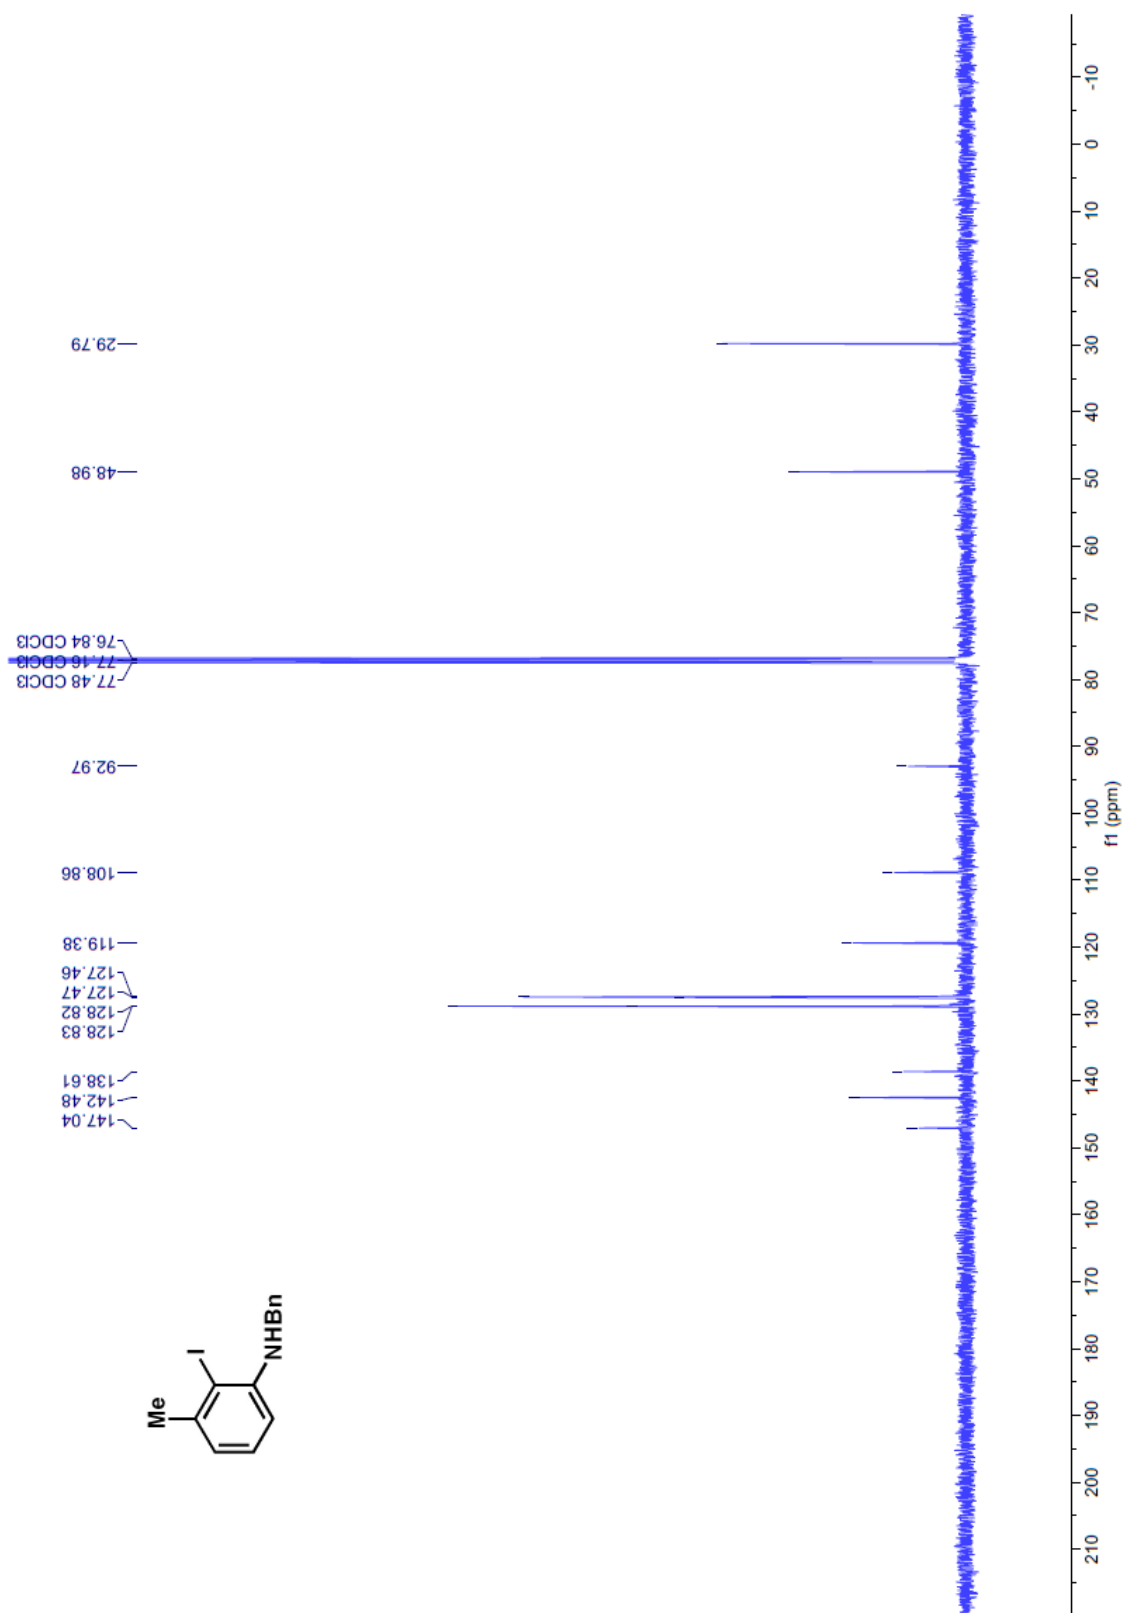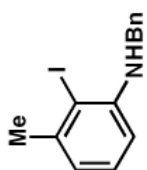

<sup>13</sup>C NMR (100 MHz, CDCl<sub>3</sub>) of **1b**

<sup>1</sup>H NMR (400 MHz, CDCl<sub>3</sub>) of **1e**

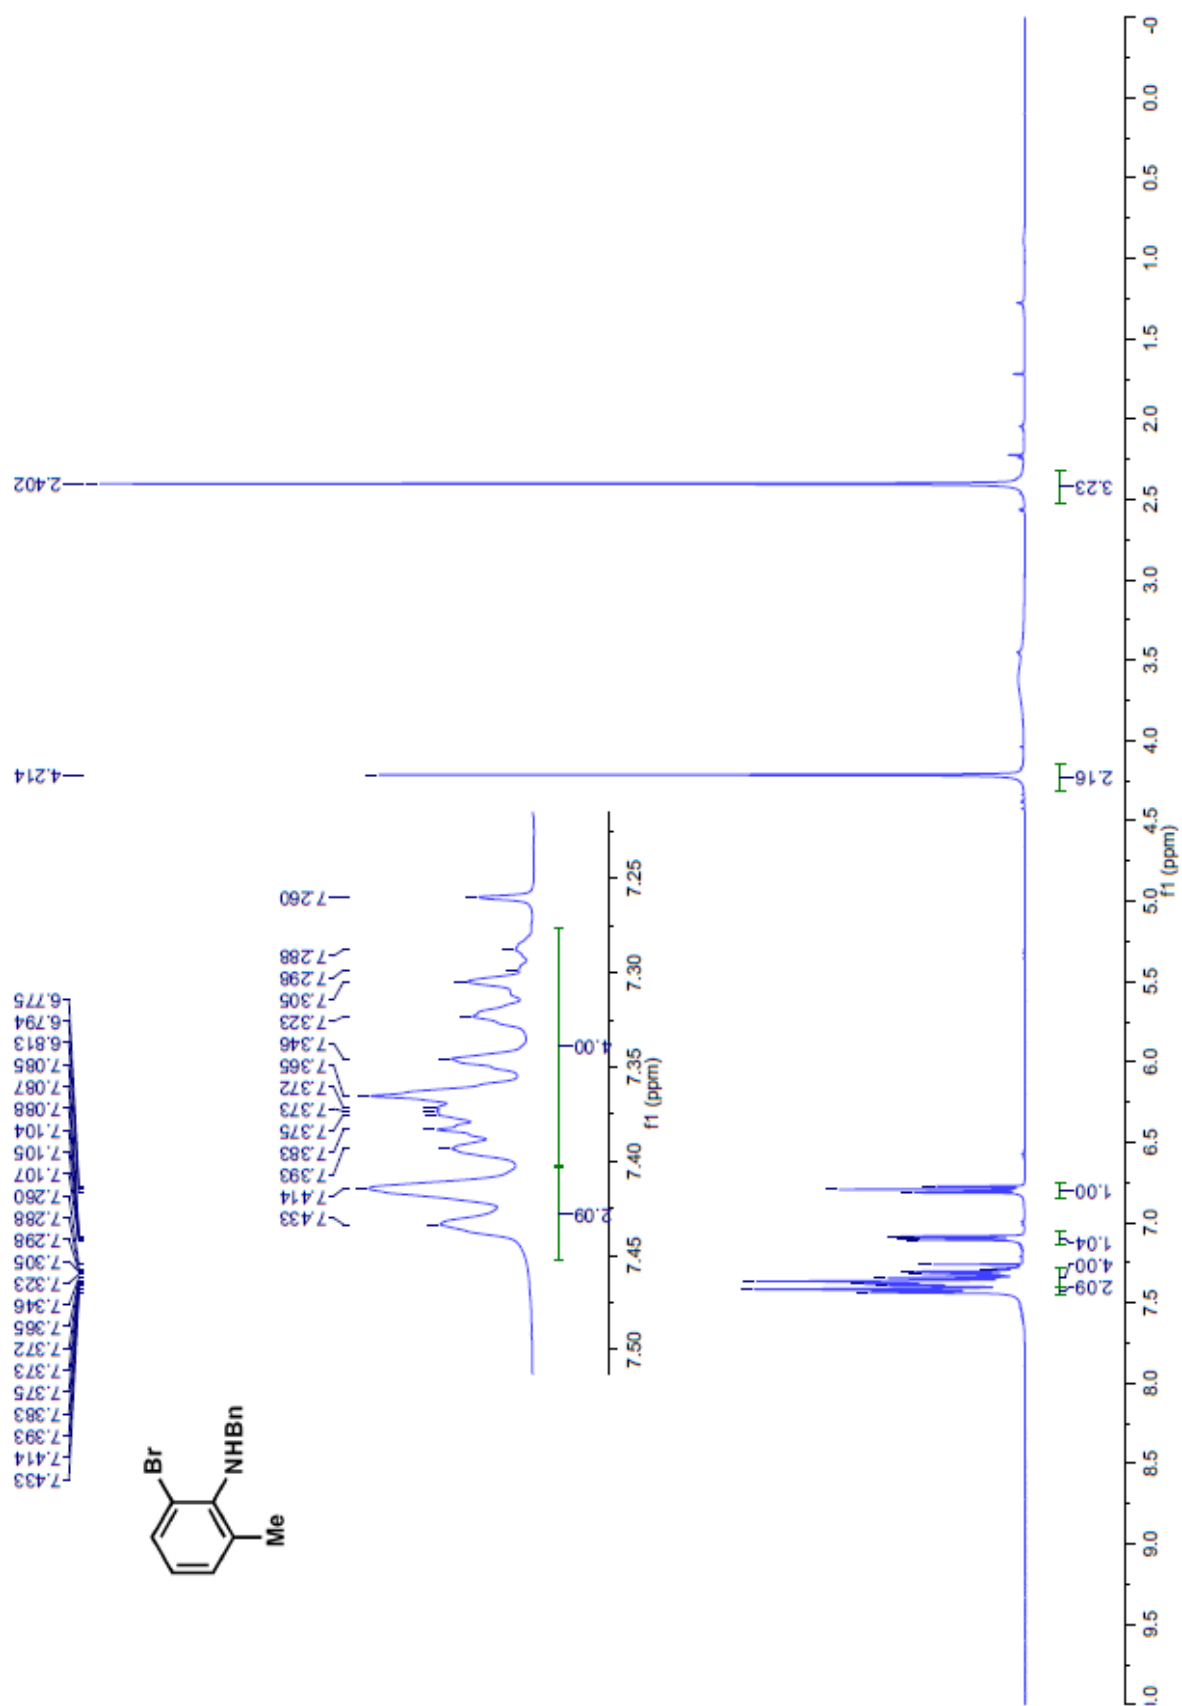

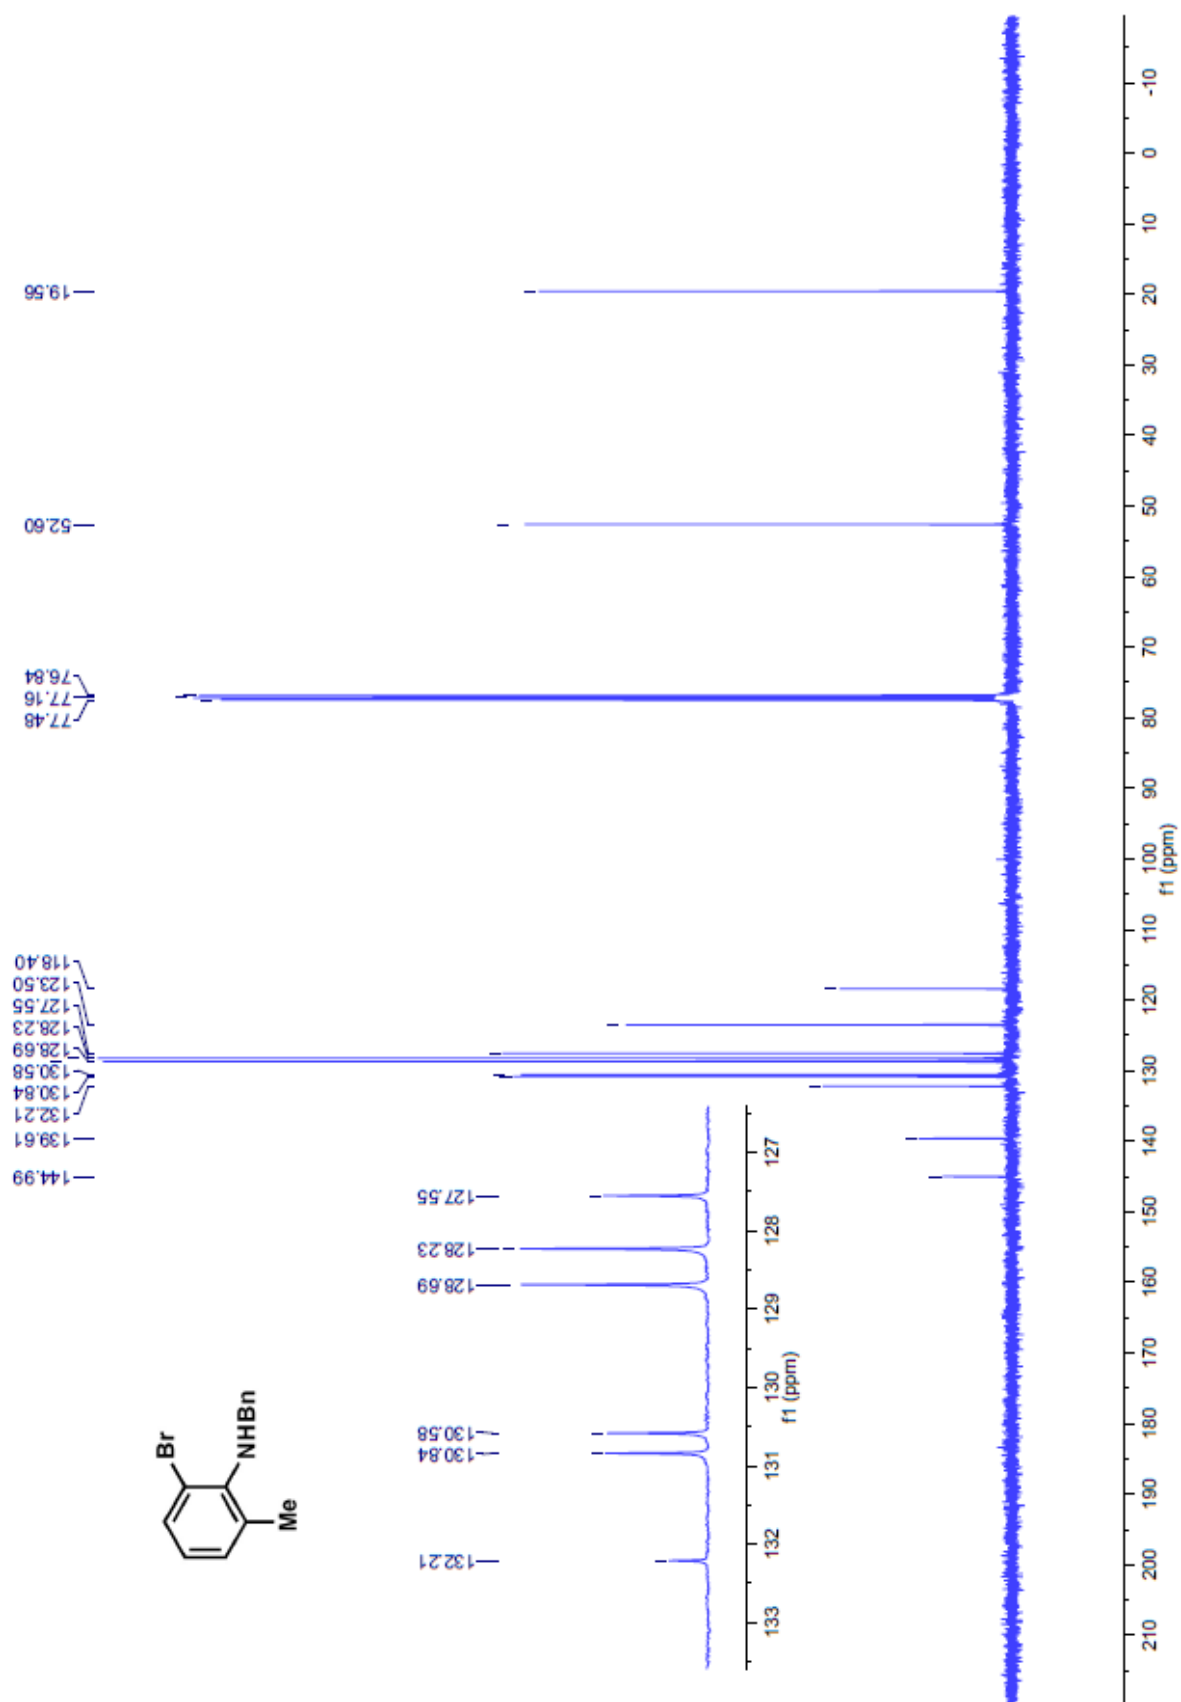

<sup>13</sup>C NMR (100 MHz, CDCl<sub>3</sub>) of **1e**

<sup>1</sup>H NMR (400 MHz, CDCl<sub>3</sub>) of **1d**

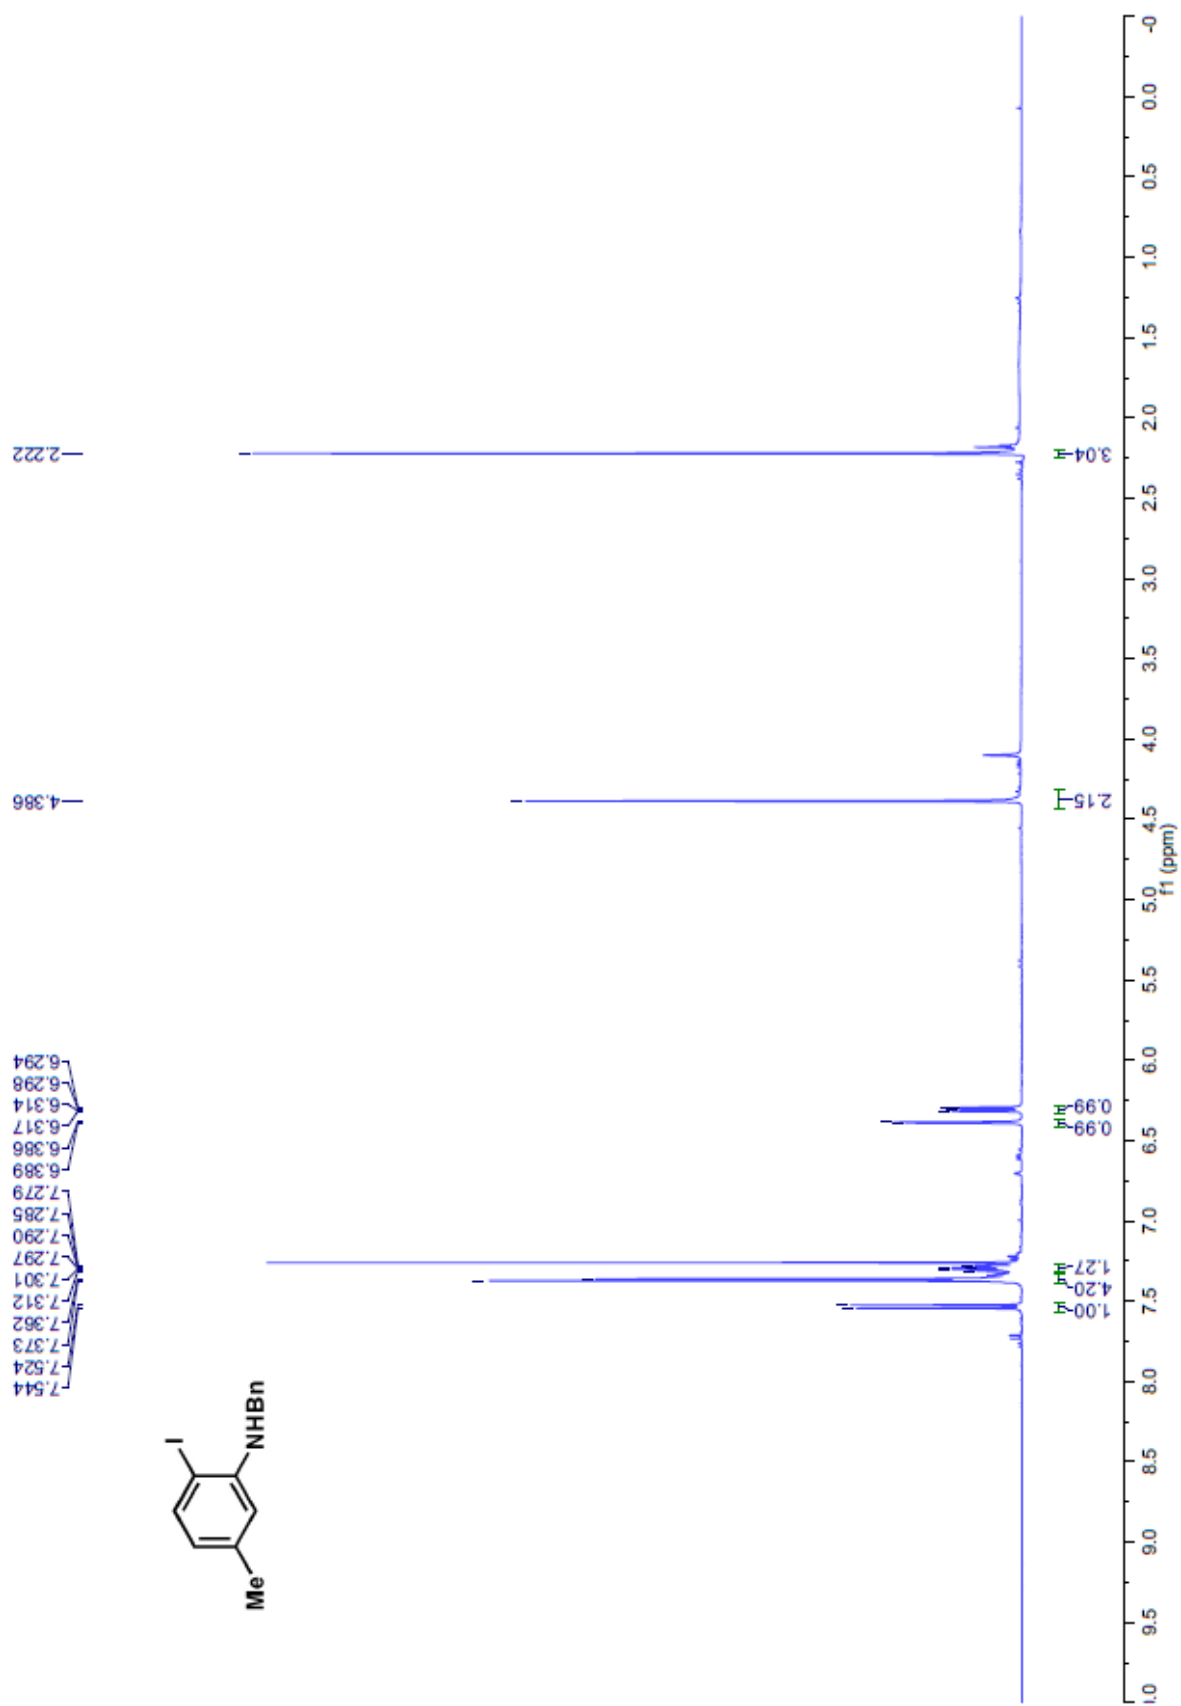

<sup>1</sup>H NMR (600 MHz, CDCl<sub>3</sub>) of *SI*

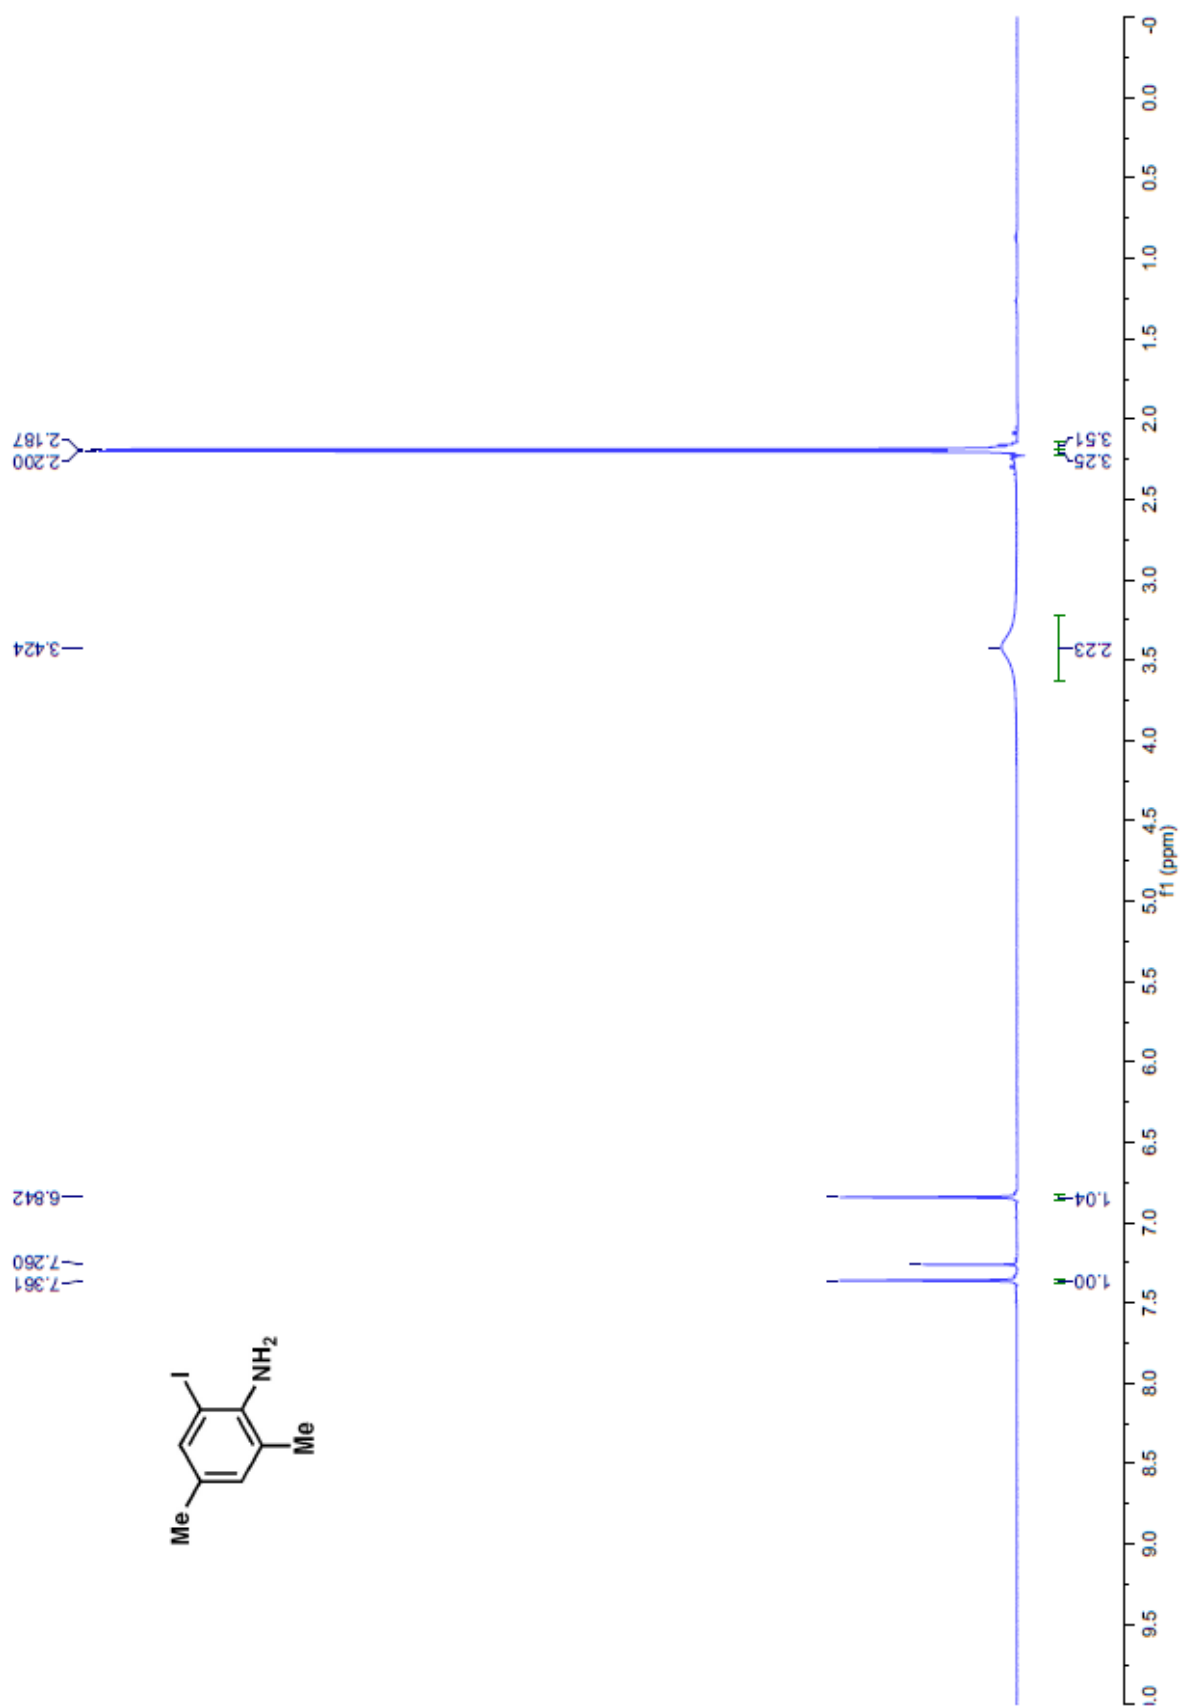



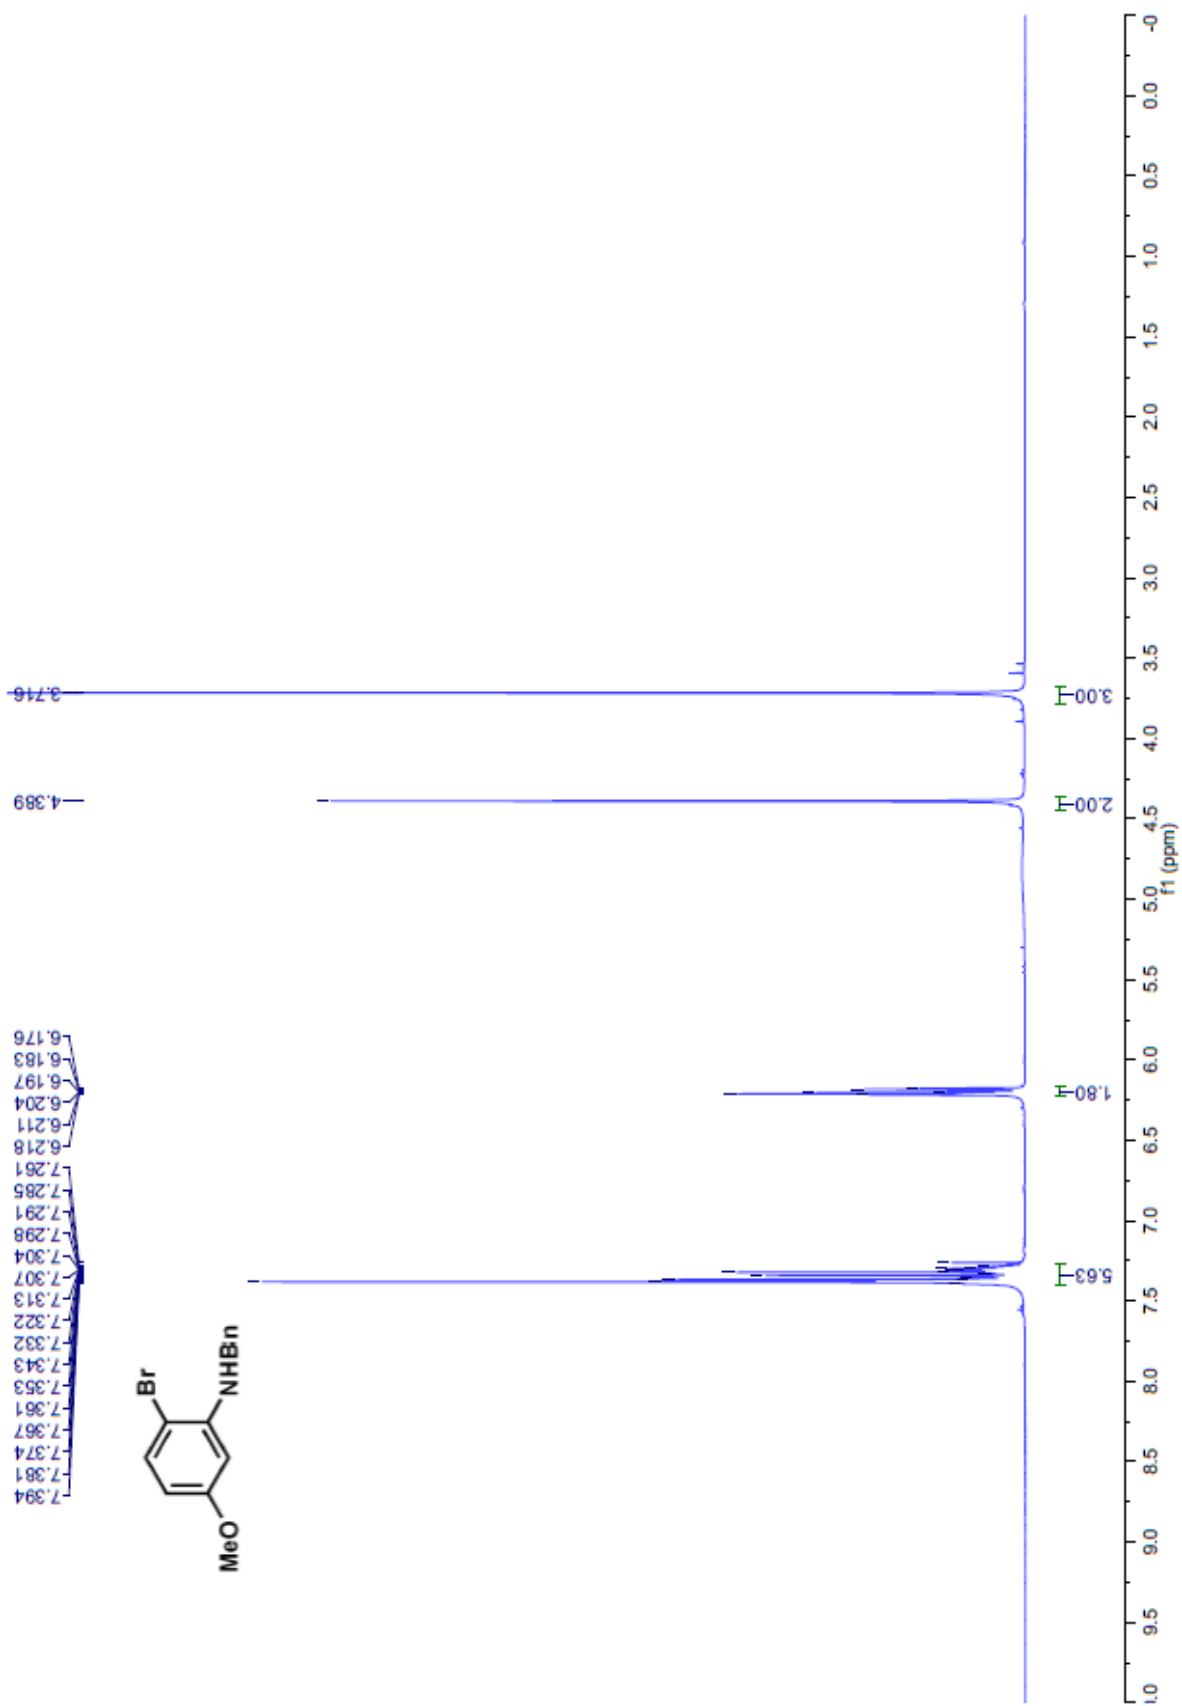

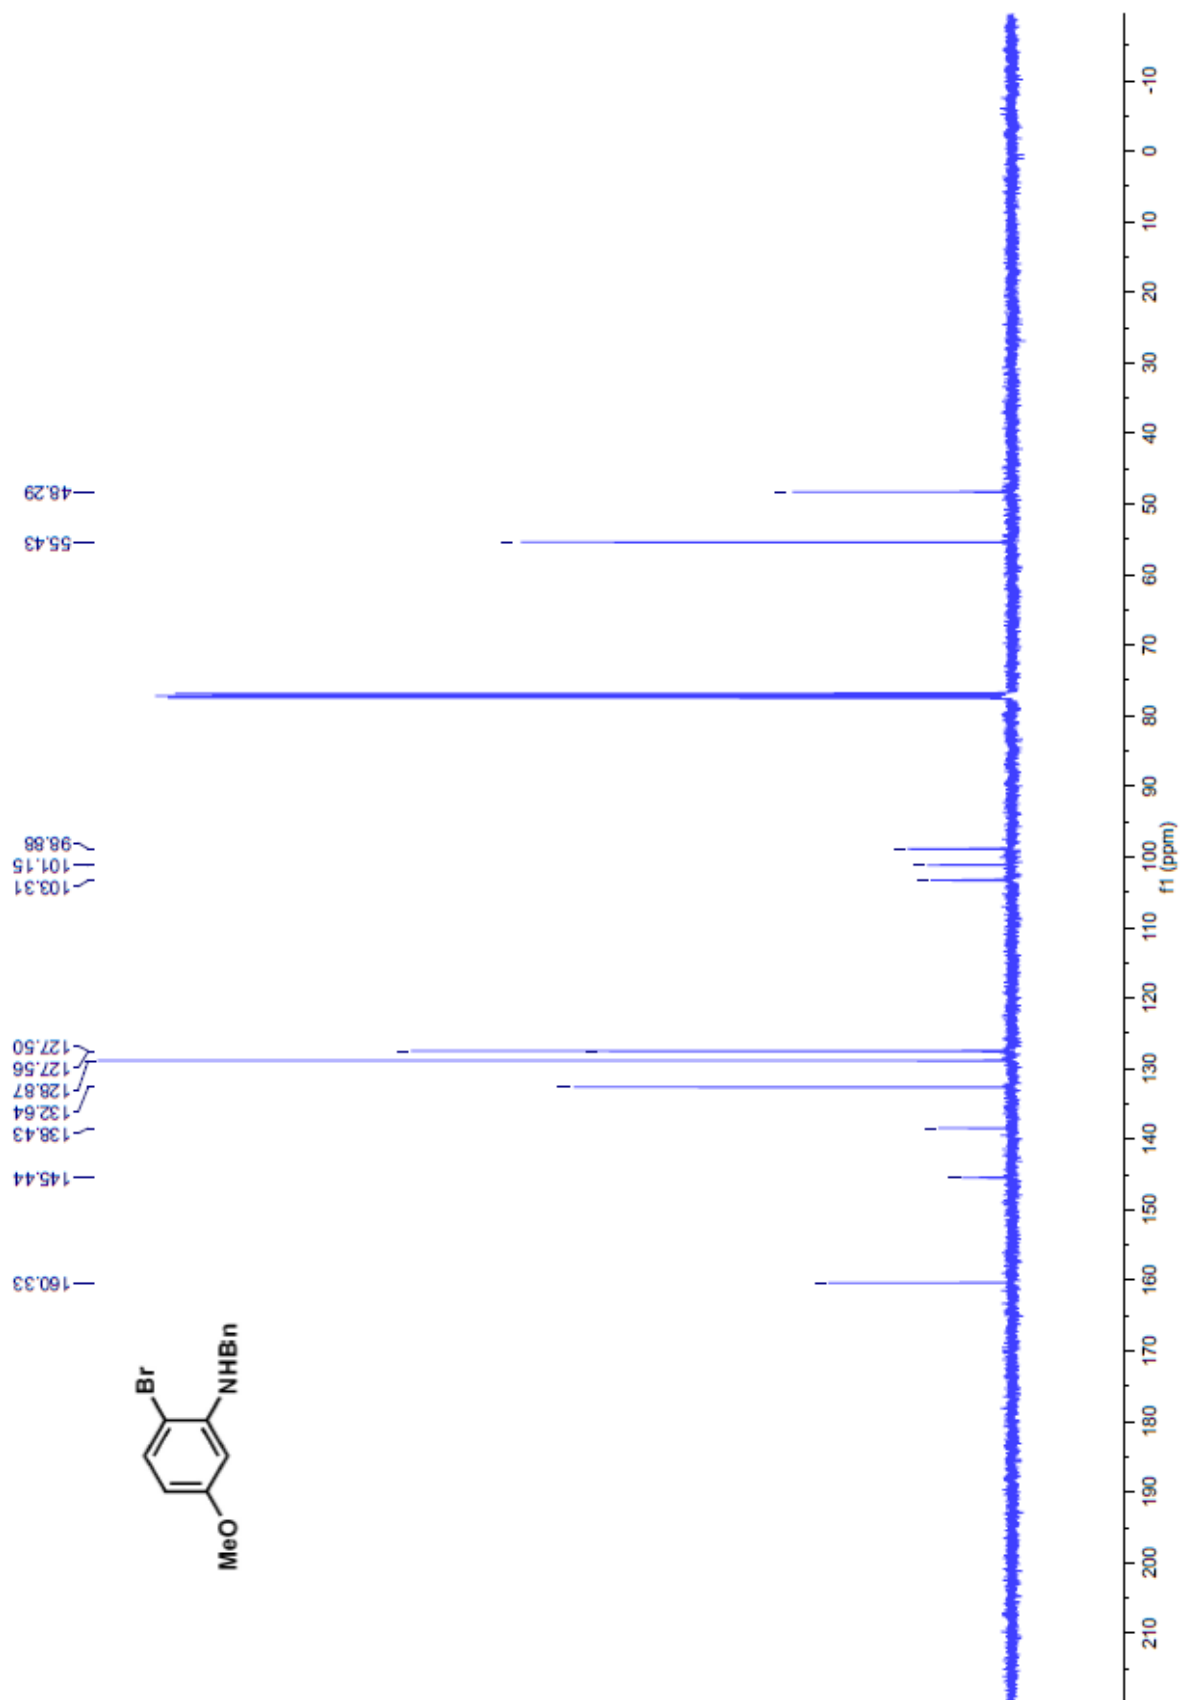

Supplement: d0cc04935b1.pdf [file d0cc04935b1.pdf]
